# Supplementary material
Source: MDPI journal article supplement (https://www.mdpi.com/2073-4433/12/12/1617)

## General Methods

All reagents were purchased from commercial sources and used without further purification unless otherwise noted. CHN **1** and *trans*-3-carene oxide **4** were prepared according to McKnight et al. Silica gel TLC plates (60  $\mu$ m) with a fluorescent indicator (254 nm) were used to monitor the progress of the reactions; they were visualized using UV, anisaldehyde, or KMnO<sub>4</sub> stain. Purification was accomplished with silica gel column chromatography using a Teledyne Isco CombiFlashC Lumen with 25  $\mu$ m SiliCycle spherical silica gel. <sup>1</sup>H, <sup>13</sup>C, HSQC, and COSY NMR spectra were recorded on a Bruker AV400 spectrometer and referenced to the protic residue of the deuterated solvents: chloroform-*d* (7.26 ppm), methanol-*d*<sub>4</sub> (3.31 ppm), ethanol-*d*<sub>6</sub> (3.56 ppm), or dimethyl sulfoxide-*d*<sub>6</sub> (2.50 ppm) unless otherwise noted. IR spectra were recorded on a ThermoNicolet IR100 spectrometer using a Thunderdome Attenuated Total Reflectance (ATR) sample accessory. High-resolution mass spectroscopy data was acquired via a Vanquish UHPLC/HPLC system coupled to Q Exactive Orbitrap MS with electrospray ionization in positive mode. Abbreviations include ethyl acetate (EtOAc), column volume (CV), retention factor (R<sub>f</sub>), singlet (s), doublet (d), doublet of doublets (dd), triplet (t), triplet of triplets (td), multiplet (m), broad (b), weak (w), medium (m), and strong (s).

## Product Isolation and Characterization

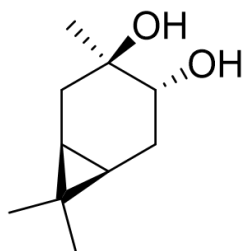

*trans*-**2**

CHN **1** (231 mg, 1.07 mmol) was suspended in 10% v/v H<sub>2</sub>O/DMSO (0.5 mL D.I. water, 4.5 mL DMSO), then stirred at room temperature for 5 hours. The reaction mixture was quenched with 0.5 M NaOH (2.14 mL, 1 equiv), then transferred to a separatory funnel with diethyl ether (30 mL). The mixture was extracted with diethyl ether (4 x 10 mL), then the combined organic extracts were washed with D.I. water (3 x 50 mL), dried with anhydrous Na<sub>2</sub>SO<sub>4</sub>, gravity filtered, and concentrated in vacuo. The crude product was purified by column chromatography (12 g SiO<sub>2</sub>, 0-100% EtOAc/hexane), yielding impure *trans*-**2** (47 mg, 26% yield). The impure *trans*-**2** was repurified by column chromatography (12 g SiO<sub>2</sub>, 0-40% EtOAc/hexane over 1.5 CV, 40% for 4 CV, 40-100% over 17 CV), yielding pure *trans*-**2** as a white crystalline solid: IR (ATR) cm<sup>-1</sup> 3385 (bd m, alcoholic OH), 2929 (m), 1064 (s); HRMS ESI + *m/z* calculated for [C<sub>10</sub>H<sub>18</sub>O<sub>2</sub>]<sup>+</sup> (170.1293, observed; 170.1301, expected); R<sub>f</sub> 0.11 (30% EtOAc/hexane, anisaldehyde); <sup>1</sup>H NMR (400 MHz, CDCl<sub>3</sub>)  $\delta$  3.33 (dd, *J* = 10.3, 7.4 Hz, 1H), 2.53 (s, 2H), 2.08 (dd, *J* = 14.4, 7.3 Hz, 1H), 2.00 – 1.91 (m, 1H), 1.67 – 1.59 (m, 1H), 1.22 – 1.19 (m, 4H), 0.97 (s, 3H), 0.95 (s, 3H), 0.73-0.65 (m, 2H);

$^{13}\text{C}$  { $^1\text{H}$ } NMR (101 MHz,  $\text{CDCl}_3$ )  $\delta$  74.56, 73.46, 33.88, 28.79, 27.93, 21.09, 20.10, 19.14, 17.77, 15.91.

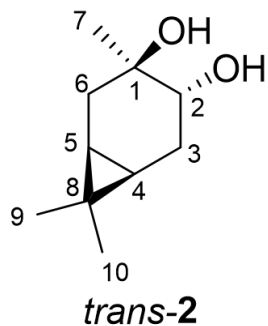

| Assignment     | # H | Multiplicity | $^1\text{H}$ $\delta$ (ppm, $\text{CDCl}_3$ ) | $^1\text{H}$ $\delta$ (ppm, $\text{MeOD-}d_4$ ) | $^1\text{H}$ $\delta$ (ppm, $\text{EtOD-}d_6$ ) | $^1\text{H}$ $\delta$ (ppm, 16.7% $\text{D}_2\text{O}/\text{DMSO-}d_6$ ) | $^1\text{H}$ $\delta$ (ppm, $\text{DMSO-}d_6$ ) |
|----------------|-----|--------------|-----------------------------------------------|-------------------------------------------------|-------------------------------------------------|--------------------------------------------------------------------------|-------------------------------------------------|
| 2              | 1   | dd           | 3.33                                          | obscured                                        | 3.33                                            | 3.09                                                                     | 3.09                                            |
| 3 <sub>A</sub> | 1   | dd           | 2.08                                          | 2.04                                            | 2.04                                            | 1.86 - 1.80                                                              | 1.87 - 1.82                                     |
| 3 <sub>B</sub> | 1   | m            | 1.67 - 1.59                                   | 1.70 - 1.62                                     | 1.72 - 1.64                                     | 1.54 - 1.46                                                              | 1.55 - 1.47                                     |
| 4 and 5        | 2   | m            | 0.73 - 0.65                                   | 0.75 - 0.67                                     | 0.74 - 0.66                                     | 0.63 - 0.56                                                              | 0.64 - 0.57                                     |
| 6 <sub>A</sub> | 1   | m            | 2.00 - 1.91                                   | 1.95 - 1.89                                     | 1.97 - 1.91                                     | 1.80 - 1.75                                                              | 1.82 - 1.76                                     |
| 6 <sub>B</sub> | 1   | m            | 1.22                                          | 1.23                                            | 1.25                                            | 1.05                                                                     | 1.06                                            |
| 7              | 3   | s            | 1.22                                          | 1.18                                            | 1.19                                            | 1.00                                                                     | 1.02                                            |
| 9 and 10       | 3   | s            | 0.97 and 0.95                                 | 0.99 and 0.99                                   | 1.00 and 1.00                                   | 0.91 and 0.89                                                            | 0.94 and 0.92                                   |

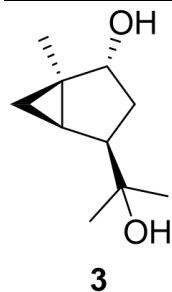

CHN **1** (101 mg, 0.469 mmol) was suspended in D.I. water (5 mL, 0.09 M), then stirred at room temperature for 16 hours. The reaction mixture was quenched with 0.5 M NaOH (0.938 mL, 1 equiv), then concentrated in vacuo. The crude product was purified by column chromatography (12 g SiO<sub>2</sub>, 0-100% EtOAc/hexane), yielding **3** as a white crystalline solid (54 mg, 68% yield): IR (ATR) cm<sup>-1</sup> 3337 (bd m, alcoholic OH), 2968 (m); HRMS ESI+ *m/z* calculated for [C<sub>10</sub>H<sub>18</sub>O<sub>2</sub>]<sup>+</sup> (170.1292, observed; 170.1301, expected); R<sub>f</sub> 0.06 (30% EtOAc/hexane, anisaldehyde); <sup>1</sup>H NMR (400 MHz, CDCl<sub>3</sub>) δ 4.07 (d, *J* = 4.5 Hz, 1H), 2.51 (m, 1H), 1.89 (br-s, 2H), 1.53 – 1.37 (m, 2H), 1.25 (s, 3H), 1.21 (s, 3H), 1.14 (m, 4H), 0.58 (t, *J* = 4.5 Hz, 1H), 0.29 (dd, *J* = 5.0, 2.5 Hz, 1H) ppm; <sup>13</sup>C {<sup>1</sup>H} NMR (101 MHz, CDCl<sub>3</sub>) δ 76.70, 72.59, 48.19, 32.45, 29.48, 27.82, 26.56, 24.09, 16.54, 13.17 ppm.

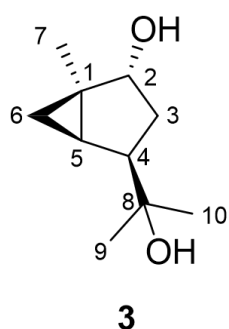

| Assignment     | # H | Multiplicity | <sup>1</sup> H δ (ppm, CDCl <sub>3</sub> ) | <sup>1</sup> H δ (ppm, MeOD- <i>d</i> <sub>4</sub> ) | <sup>1</sup> H δ (ppm, EtOD- <i>d</i> <sub>6</sub> ) | <sup>1</sup> H δ (ppm, 16.7% D <sub>2</sub> O/<br>DMSO- <i>d</i> <sub>6</sub> ) |
|----------------|-----|--------------|--------------------------------------------|------------------------------------------------------|------------------------------------------------------|---------------------------------------------------------------------------------|
| 2              | 1   | d            | 4.07                                       | 3.99                                                 | 3.99                                                 | 3.82                                                                            |
| 3              | 2   | m            | 1.53 - 1.37                                | 1.51 - 1.38                                          | 1.53 - 1.36                                          | 1.32 - 1.20                                                                     |
| 4              | 1   | m            | 2.51                                       | 2.54                                                 | 2.58                                                 | 2.37                                                                            |
| 5              | 1   | m            | 1.12                                       | 1.12                                                 | 1.12                                                 | 0.96                                                                            |
| 6 <sub>A</sub> | 1   | t            | 0.58                                       | 0.57                                                 | 0.55                                                 | 0.42                                                                            |
| 6 <sub>B</sub> | 1   | dd           | 0.29                                       | 0.27                                                 | 0.25                                                 | 0.14                                                                            |
| 7              | 3   | s            | 1.21                                       | 1.20                                                 | 1.20                                                 | 1.09                                                                            |
| 9 and 10       | 3   | s            | 1.14 and 1.25                              | 1.18 and 1.21                                        | 1.18 and 1.21                                        | 1.04 and 1.09                                                                   |

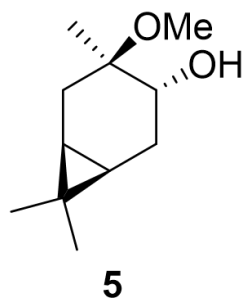

*trans*-3-Carene oxide **4** (152 mg, 1 mmol) and Bi(NO<sub>3</sub>)<sub>3</sub> • 5 H<sub>2</sub>O (485 mg, 1 equiv) were suspended in methanol (5 mL, 0.2 M). The reaction mixture was stirred for 1.25 hours at room temperature, then filtered through celite and rinsed with dichloromethane (2 x 10 mL). The filtrate was washed with saturated sodium bicarbonate (2 x 10 mL). The organic extracts were dried with anhydrous sodium sulfate, then gravity filtered and concentrated in vacuo to yield a clear crude oil. The crude product was purified by column chromatography (12 g, SiO<sub>2</sub>, 0-30% EtOAc/hexane), yielding **5** as a clear oil (87 mg, 47% yield): IR (ATR) cm<sup>-1</sup> 3453 (bd w, alcoholic OH), 2934 (m), 1061 (s); HRMS ESI + *m/z* calculated for [C<sub>11</sub>H<sub>20</sub>O<sub>2</sub>]<sup>+</sup> (184.1450, observed; 184.1463, expected); R<sub>f</sub> 0.50 (30% EtOAc/hexane, anisaldehyde); <sup>1</sup>H NMR (400 MHz, CDCl<sub>3</sub>) δ 3.40 (dd, *J* = 10.3, 7.4 Hz, 1H), 3.21 (s, 3H), 2.14 – 2.06 (m, 2H), 1.75 – 1.67 (m, 1H), 1.16 (s, 3H), 1.10 – 1.05 (m, 1H), 0.99 (s, 3H), 0.96 (s, 3H), 0.70 – 0.63 (m, 2H); <sup>13</sup>C {<sup>1</sup>H} NMR (101 MHz, CDCl<sub>3</sub>) δ 77.57, 73.14, 48.81, 28.89, 28.29, 26.61, 20.53, 19.67, 17.81, 15.97, 13.84.

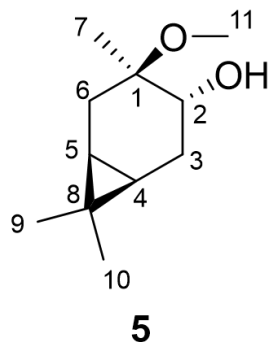

| Assignment     | # H | Multiplicity | <sup>1</sup> H δ (ppm, CDCl <sub>3</sub> ) | <sup>1</sup> H δ (ppm, MeOD- <i>d</i> <sub>4</sub> ) | <sup>1</sup> H δ (ppm, 16.7% D <sub>2</sub> O/MeOD- <i>d</i> <sub>4</sub> ) |
|----------------|-----|--------------|--------------------------------------------|------------------------------------------------------|-----------------------------------------------------------------------------|
| 2              | 1   | dd           | 3.40                                       | 3.42                                                 | 3.45                                                                        |
| 3 <sub>A</sub> | 1   | m            | 2.10                                       | 2.04 - 2.01                                          | 2.05 - 2.02                                                                 |
| 3 <sub>B</sub> | 1   | m            | 1.75 - 1.67                                | 1.74 - 1.66                                          | 1.75 - 1.67                                                                 |
| 4 and 5        | 2   | m            | 0.70 - 0.63                                | 0.74 - 0.66                                          | 0.74 - 0.66                                                                 |
| 6 <sub>A</sub> | 1   | m            | 2.12                                       | 2.10 - 2.04                                          | 2.08 - 2.05                                                                 |

|                |   |   |               |               |               |
|----------------|---|---|---------------|---------------|---------------|
| 6 <sub>B</sub> | 1 | m | 1.10-1.05     | 1.15          | 1.16          |
| 7              | 3 | s | 1.16          | 1.17          | 1.18          |
| 9 and 10       | 3 | s | 0.99 and 0.96 | 0.99 and 0.98 | 0.98 and 0.97 |
| 11             | 3 | s | 3.21          | 3.22          | 3.22          |

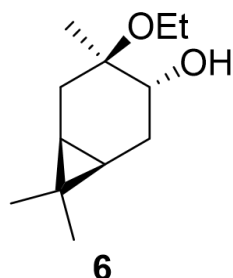

*trans*-3-Carene oxide **4** (152 mg, 1 mmol) and BiBr<sub>3</sub> (449 mg, 1 equiv) were suspended in ethanol (5 mL, 0.2 M). The reaction mixture was stirred for 1.75 hours at room temperature, then filtered through celite and rinsed with dichloromethane (2 x 10 mL). The filtrate was washed with saturated sodium bicarbonate (2 x 15 mL). The organic extracts were dried with anhydrous sodium sulfate, then gravity filtered and concentrated in vacuo to yield a clear crude oil. The crude product was purified by column chromatography (12 g, SiO<sub>2</sub>, 0-30% EtOAc/hexane), yielding **6** as a clear oil (104 mg, 53% yield): IR (ATR) cm<sup>-1</sup> 3457 (bd w, alcoholic OH), 2930 (m), 1064 (s); HRMS ESI + *m/z* calculated for [C<sub>12</sub>H<sub>22</sub>O<sub>2</sub>]<sup>+</sup> (198.1604, observed; 198.1614, expected); R<sub>f</sub> 0.67 (30% EtOAc/hexane, anisaldehyde); <sup>1</sup>H NMR (400 MHz, C<sub>6</sub>D<sub>6</sub>) δ 3.50 (dd, *J* = 10.2, 7.4 Hz, 1H), 3.17 (q, *J* = 7.0 Hz, 2H), 2.51 (br-s, 1H), 2.16 (dd, *J* = 14.6, 7.4 Hz, 1H), 1.95 – 1.84 (m, 2H), 1.18 (s, 3H), 1.06 (m, 1 H), 1.04 (t, *J* = 6.9, Hz, 3H), 0.86 (s, 3H), 0.84 (s, 3H), 0.47 – 0.40 (m, 2H); <sup>13</sup>C {<sup>1</sup>H} NMR (101 MHz, C<sub>6</sub>D<sub>6</sub>) δ 77.41, 73.39, 56.06, 29.05, 28.85, 26.78, 20.69, 19.99, 17.69, 16.36, 15.89, 14.50.

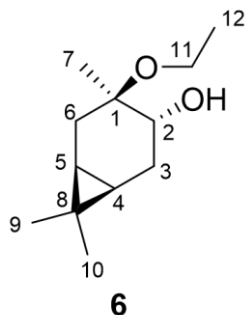

| Assignment | # H | Multiplicity | <sup>1</sup> H δ (ppm, C <sub>6</sub> D <sub>6</sub> ) | <sup>1</sup> H δ (ppm, EtOD- <i>d</i> <sub>6</sub> ) |
|------------|-----|--------------|--------------------------------------------------------|------------------------------------------------------|
| 2          | 1   | dd           | 3.50                                                   | 3.43                                                 |

|                |   |    |               |               |
|----------------|---|----|---------------|---------------|
| 3 <sub>A</sub> | 1 | dd | 2.16          | 2.11 - 2.05   |
| 3 <sub>B</sub> | 1 | m  | 1.88          | 1.77 - 1.69   |
| 4 and 5        | 2 | m  | 0.47 - 0.40   | 0.73 - 0.65   |
| 6 <sub>A</sub> | 1 | m  | 1.92          | 2.05 - 2.00   |
| 6 <sub>B</sub> | 1 | m  | 1.06          | obscured      |
| 7              | 3 | s  | 1.18          | 1.19          |
| 9 and 10       | 3 | s  | 0.86 and 0.84 | 1.01 and 1.00 |
| 11             | 2 | q  | 3.17          | 3.48          |
| 12             | 3 | t  | 1.04          | 1.14          |

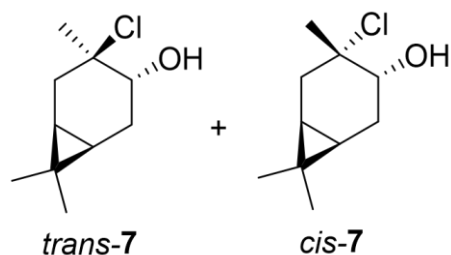

CHN **1** (250 mg, 1.16 mmol) and NaCl (339 mg, 5 equiv) were suspended in 10% v/v H<sub>2</sub>O/DMSO (0.5 mL D.I. water, 4.5 mL DMSO). The reaction mixture was stirred at room temperature for 3 hours, then quenched with NaHCO<sub>3</sub> (98 mg, 1 equiv) and extracted with diethyl ether (5 x 15 mL). The combined organic extracts were washed with D.I. water (3 x 5 mL), then dried with anhydrous Na<sub>2</sub>SO<sub>4</sub>, gravity filtered, and concentrated in vacuo to yield a clear crude oil. The crude product was purified by column chromatography (12 g, SiO<sub>2</sub>, 20-75% MTBE/pentane), yielding *trans*-**7** and *cis*-**7** in 17% and 10% yield, respectively.

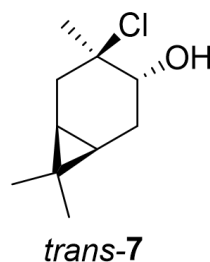

*trans*-**7** was isolated as a clear oil (38 mg, 17% yield): IR (ATR) cm<sup>-1</sup> 3449 (bd w, alcoholic OH), 2937 (m), 1069 (s); HRMS ESI + *m/z* calculated for [C<sub>10</sub>H<sub>17</sub>OCl]<sup>+</sup> (188.0960, observed; 188.0968, expected); R<sub>f</sub> 0.75 (30% EtOAc/hexane, anisaldehyde); <sup>1</sup>H NMR (400 MHz, CDCl<sub>3</sub>) δ 3.58 (dd, J

= 10.2, 7.4 Hz, 1H), 2.44 – 2.37 (m, 1H), 2.10 (dd,  $J = 14.7, 7.4$  Hz, 1H), 1.77 – 1.69 (m, 2H), 1.58 (s, 3H), 0.99 (d,  $J = 1.1$  Hz, 6H), 0.79 – 0.71 (m, 2H);  $^{13}\text{C}$   $\{^1\text{H}\}$  NMR (101 MHz,  $\text{CDCl}_3$ )  $\delta$  77.76, 74.96, 36.88, 28.59, 26.75, 21.29, 21.04, 20.29, 18.22, 15.90 ppm.

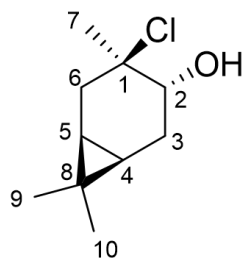

*trans-7*

| Assignment     | # H | Multiplicity | $^1\text{H}$ $\delta$ (ppm, $\text{CDCl}_3$ ) |
|----------------|-----|--------------|-----------------------------------------------|
| 2              | 1   | dd           | 3.58                                          |
| 3 <sub>A</sub> | 1   | dd           | 2.10                                          |
| 3 <sub>B</sub> | 1   | m            | 1.75                                          |
| 4 and 5        | 2   | m            | 0.79 - 0.71                                   |
| 6 <sub>A</sub> | 1   | m            | 2.41                                          |
| 6 <sub>B</sub> | 1   | m            | 1.73                                          |
| 7              | 3   | s            | 1.58                                          |
| 9 and 10       | 3   | s            | 0.99 and 0.99                                 |

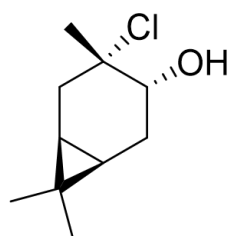

*cis-7*

*cis-7* was isolated as a clear oil (21 mg, 10% yield): IR (ATR)  $\text{cm}^{-1}$  3409 (bd w, alcoholic OH), 2932 (m), 733 (s); HRMS ESI +  $m/z$  calculated for  $[\text{C}_{10}\text{H}_{17}\text{OCl}]^+$  (188.0964, observed; 188.0968, expected);  $R_f$  0.61 (30% EtOAc/hexane, anisaldehyde);  $^1\text{H}$  NMR (400 MHz,  $\text{CDCl}_3$ )  $\delta$  3.94 (td,  $J = 5.6, 1.3$  Hz, 1H), 2.53 (m, 1H), 1.91 (dd,  $J = 6.5, 1.3$  Hz, 1H), 1.66 (ddd,  $J = 16.1, 5.7, 4.2$  Hz, 1H), 1.46 (dd,  $J = 15.4, 6.0$  Hz, 1H), 1.29 (s, 3H), 1.06 (s, 3H), 1.03 (s, 3H), 0.78 – 0.67 (m, 2H)

ppm;  $^{13}\text{C}$  { $^1\text{H}$ } NMR (101 MHz,  $\text{CDCl}_3$ )  $\delta$  71.96, 63.73, 29.64, 28.60, 27.62, 26.74, 19.27, 18.84, 18.04, 15.67.

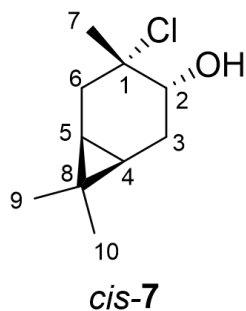

| Assignment     | # H | Multiplicity | $^1\text{H}$ $\delta$ (ppm, $\text{CDCl}_3$ ) |
|----------------|-----|--------------|-----------------------------------------------|
| 2              | 1   | td           | 3.94                                          |
| 3 <sub>A</sub> | 1   | m            | 2.53                                          |
| 3 <sub>B</sub> | 1   | m            | 1.66                                          |
| 4 and 5        | 2   | m            | 0.78 - 0.687                                  |
| 6 <sub>A</sub> | 1   | dd           | 1.91                                          |
| 6 <sub>B</sub> | 1   | dd           | 1.46                                          |
| 7              | 3   | s            | 1.29                                          |
| 9 and 10       | 3   | s            | 1.06 and 1.03                                 |



$^1\text{H}$  NMR (400 MHz,  $\text{CDCl}_3$ )

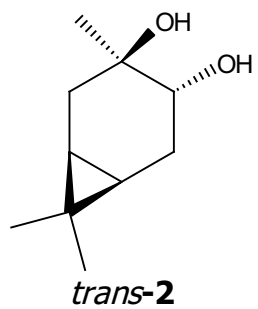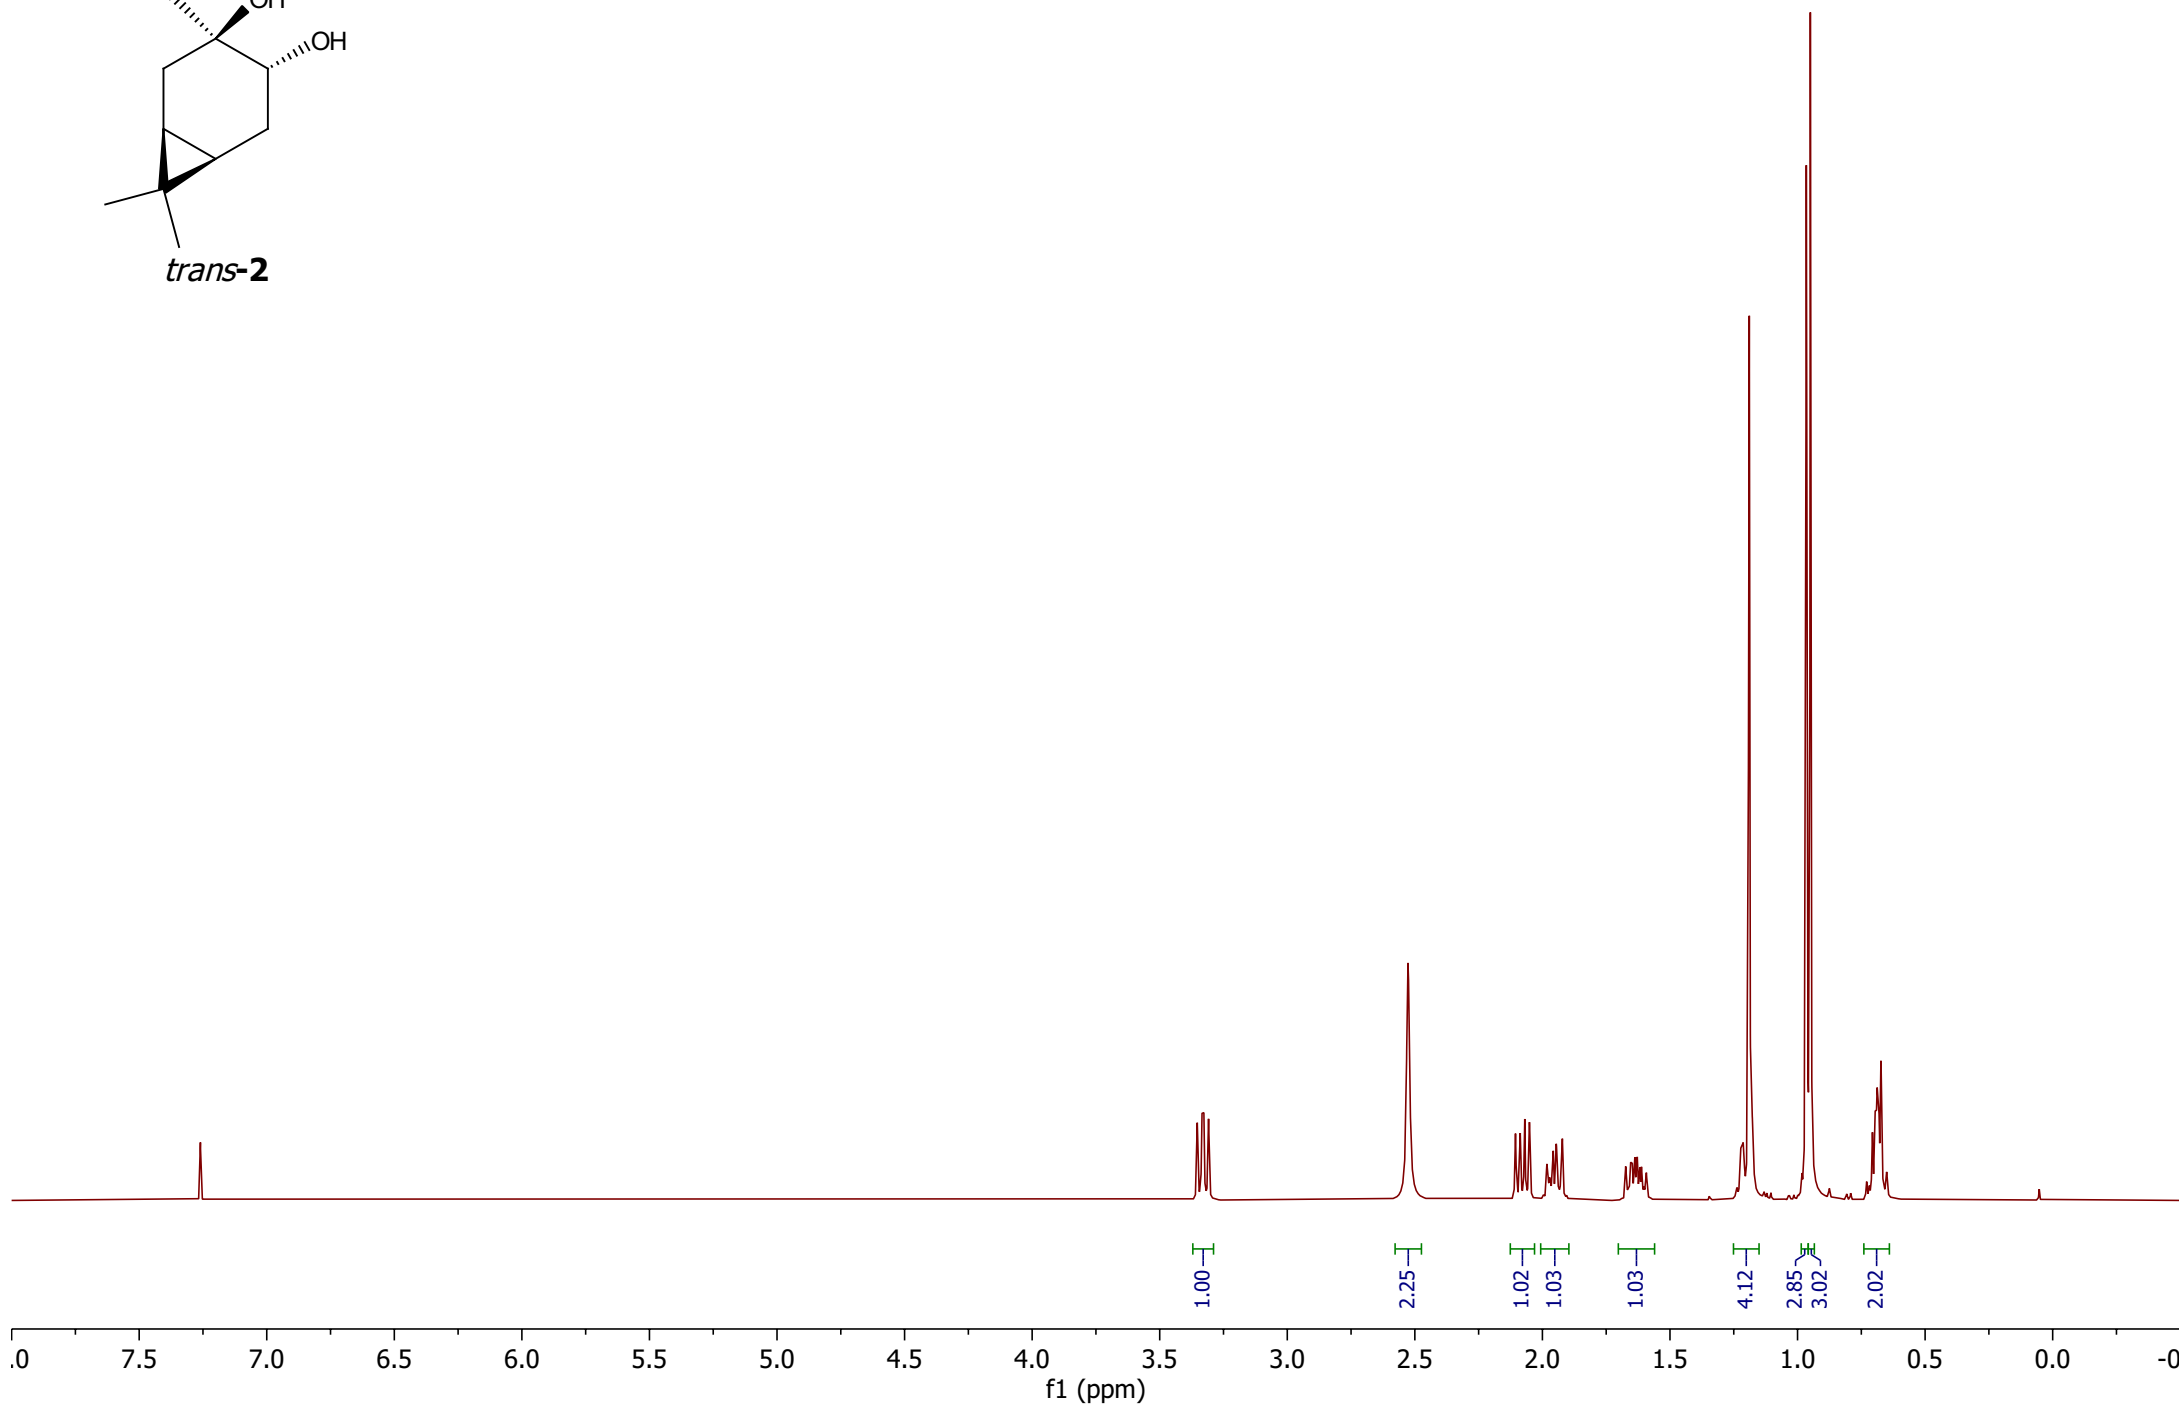

$^{13}\text{C}$   $\{^1\text{H}\}$  NMR (101 MHz,  $\text{CDCl}_3$ )

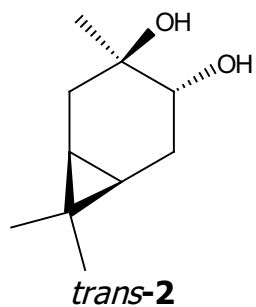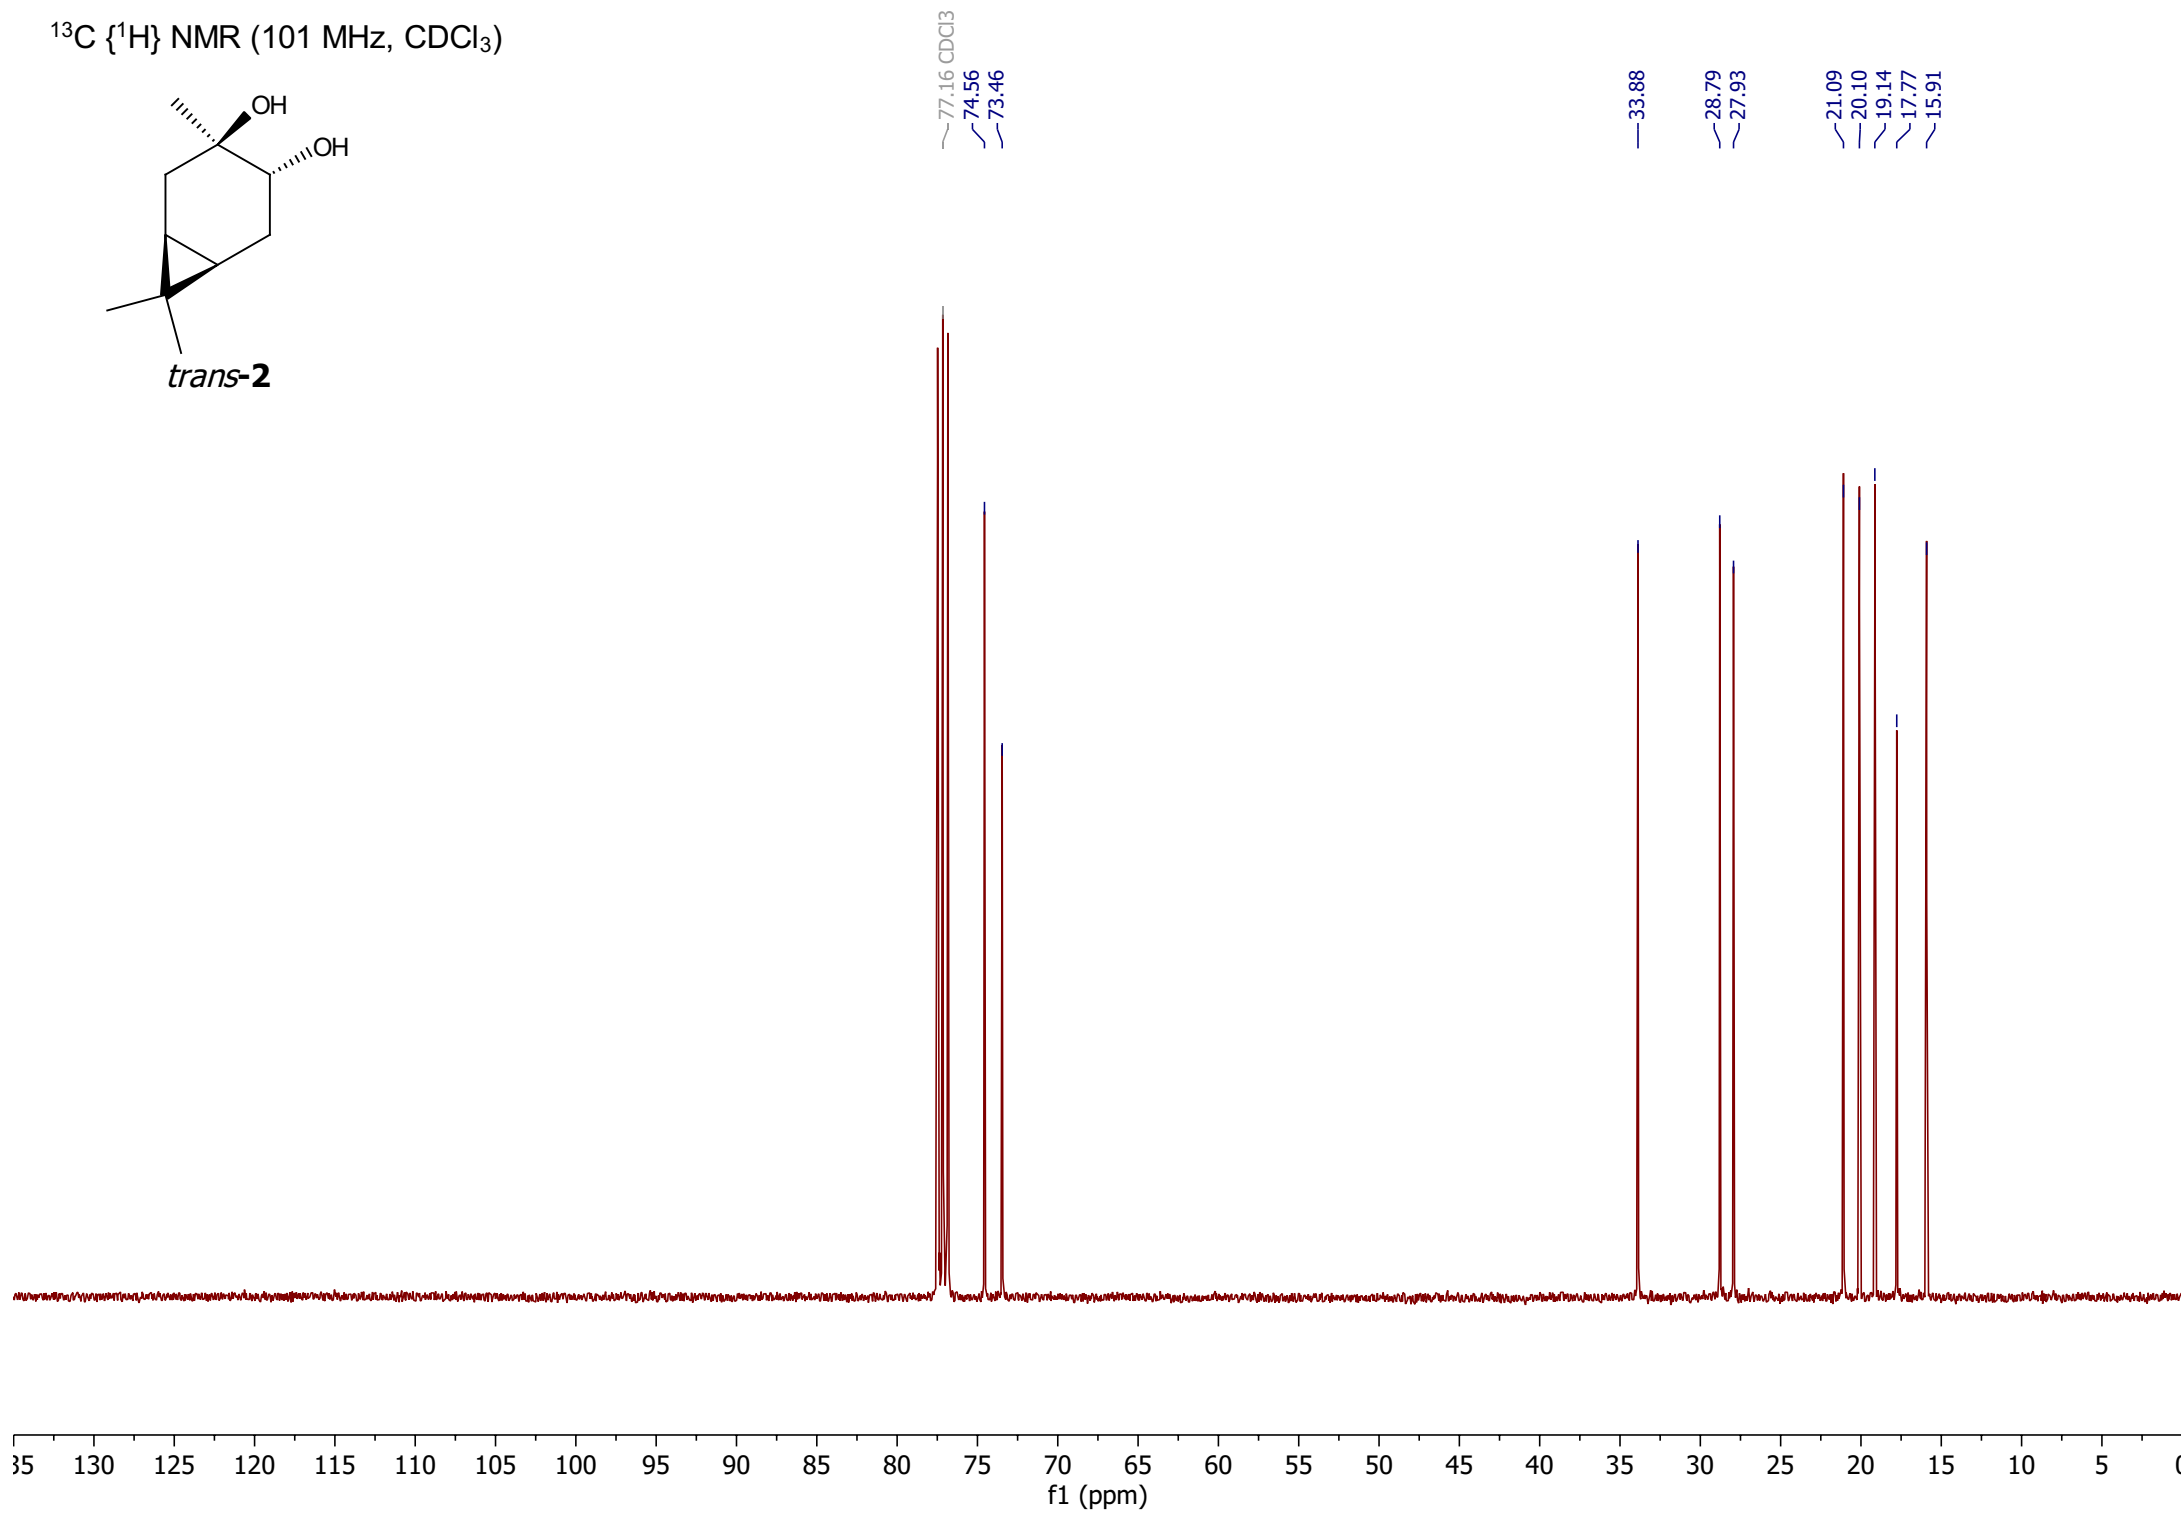

HSQC NMR ( $^1\text{H}$ - $^{13}\text{C}$ ,  $\text{CDCl}_3$ )

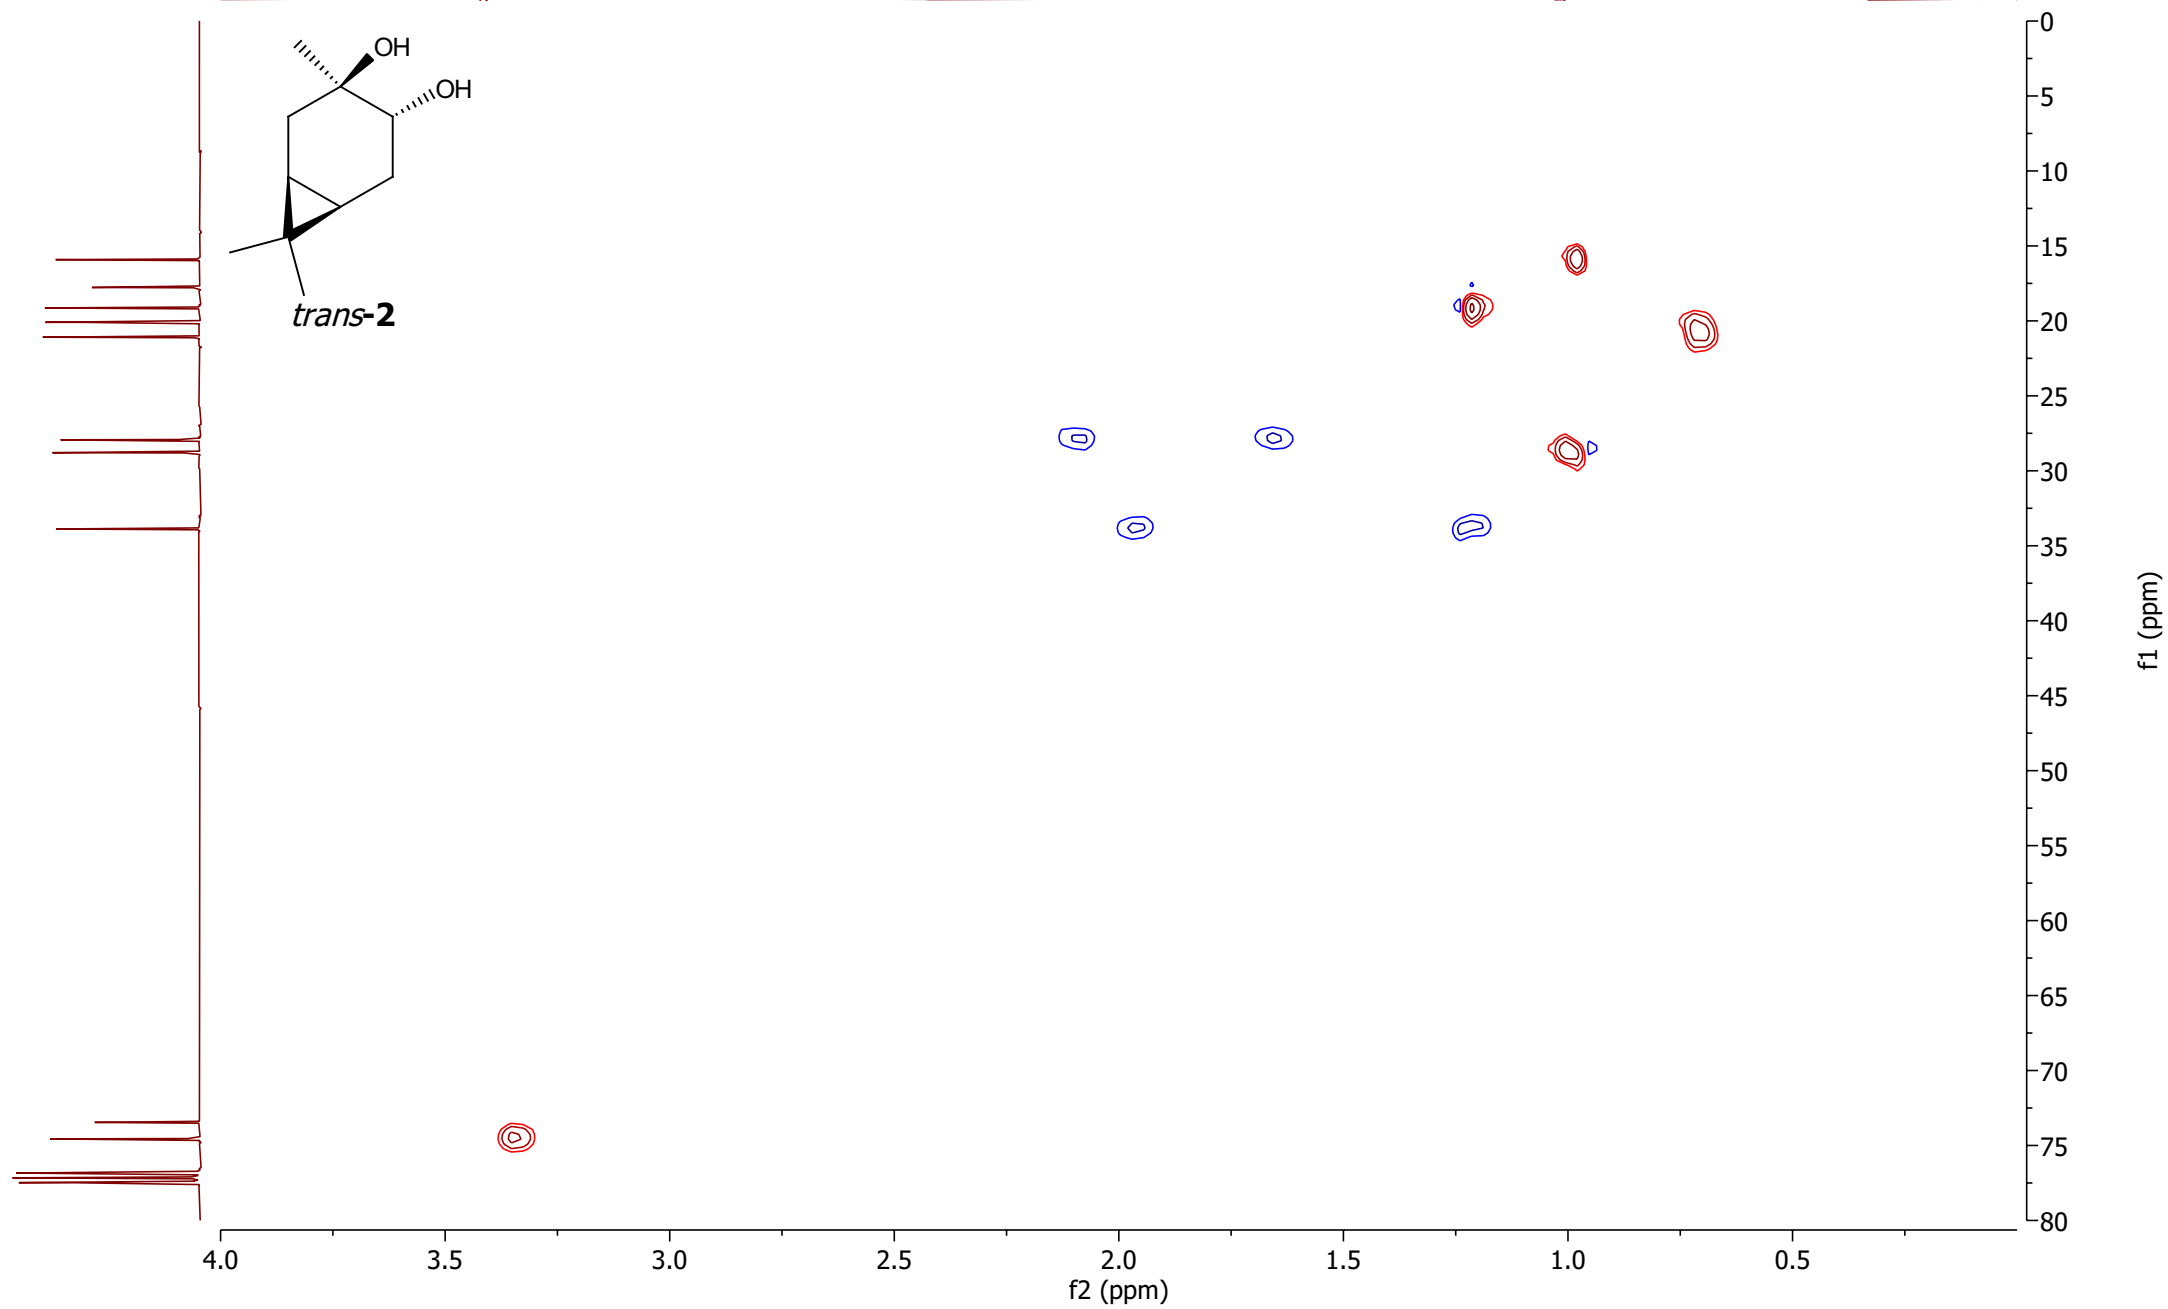

COSY NMR (400 MHz, CDCl<sub>3</sub>)

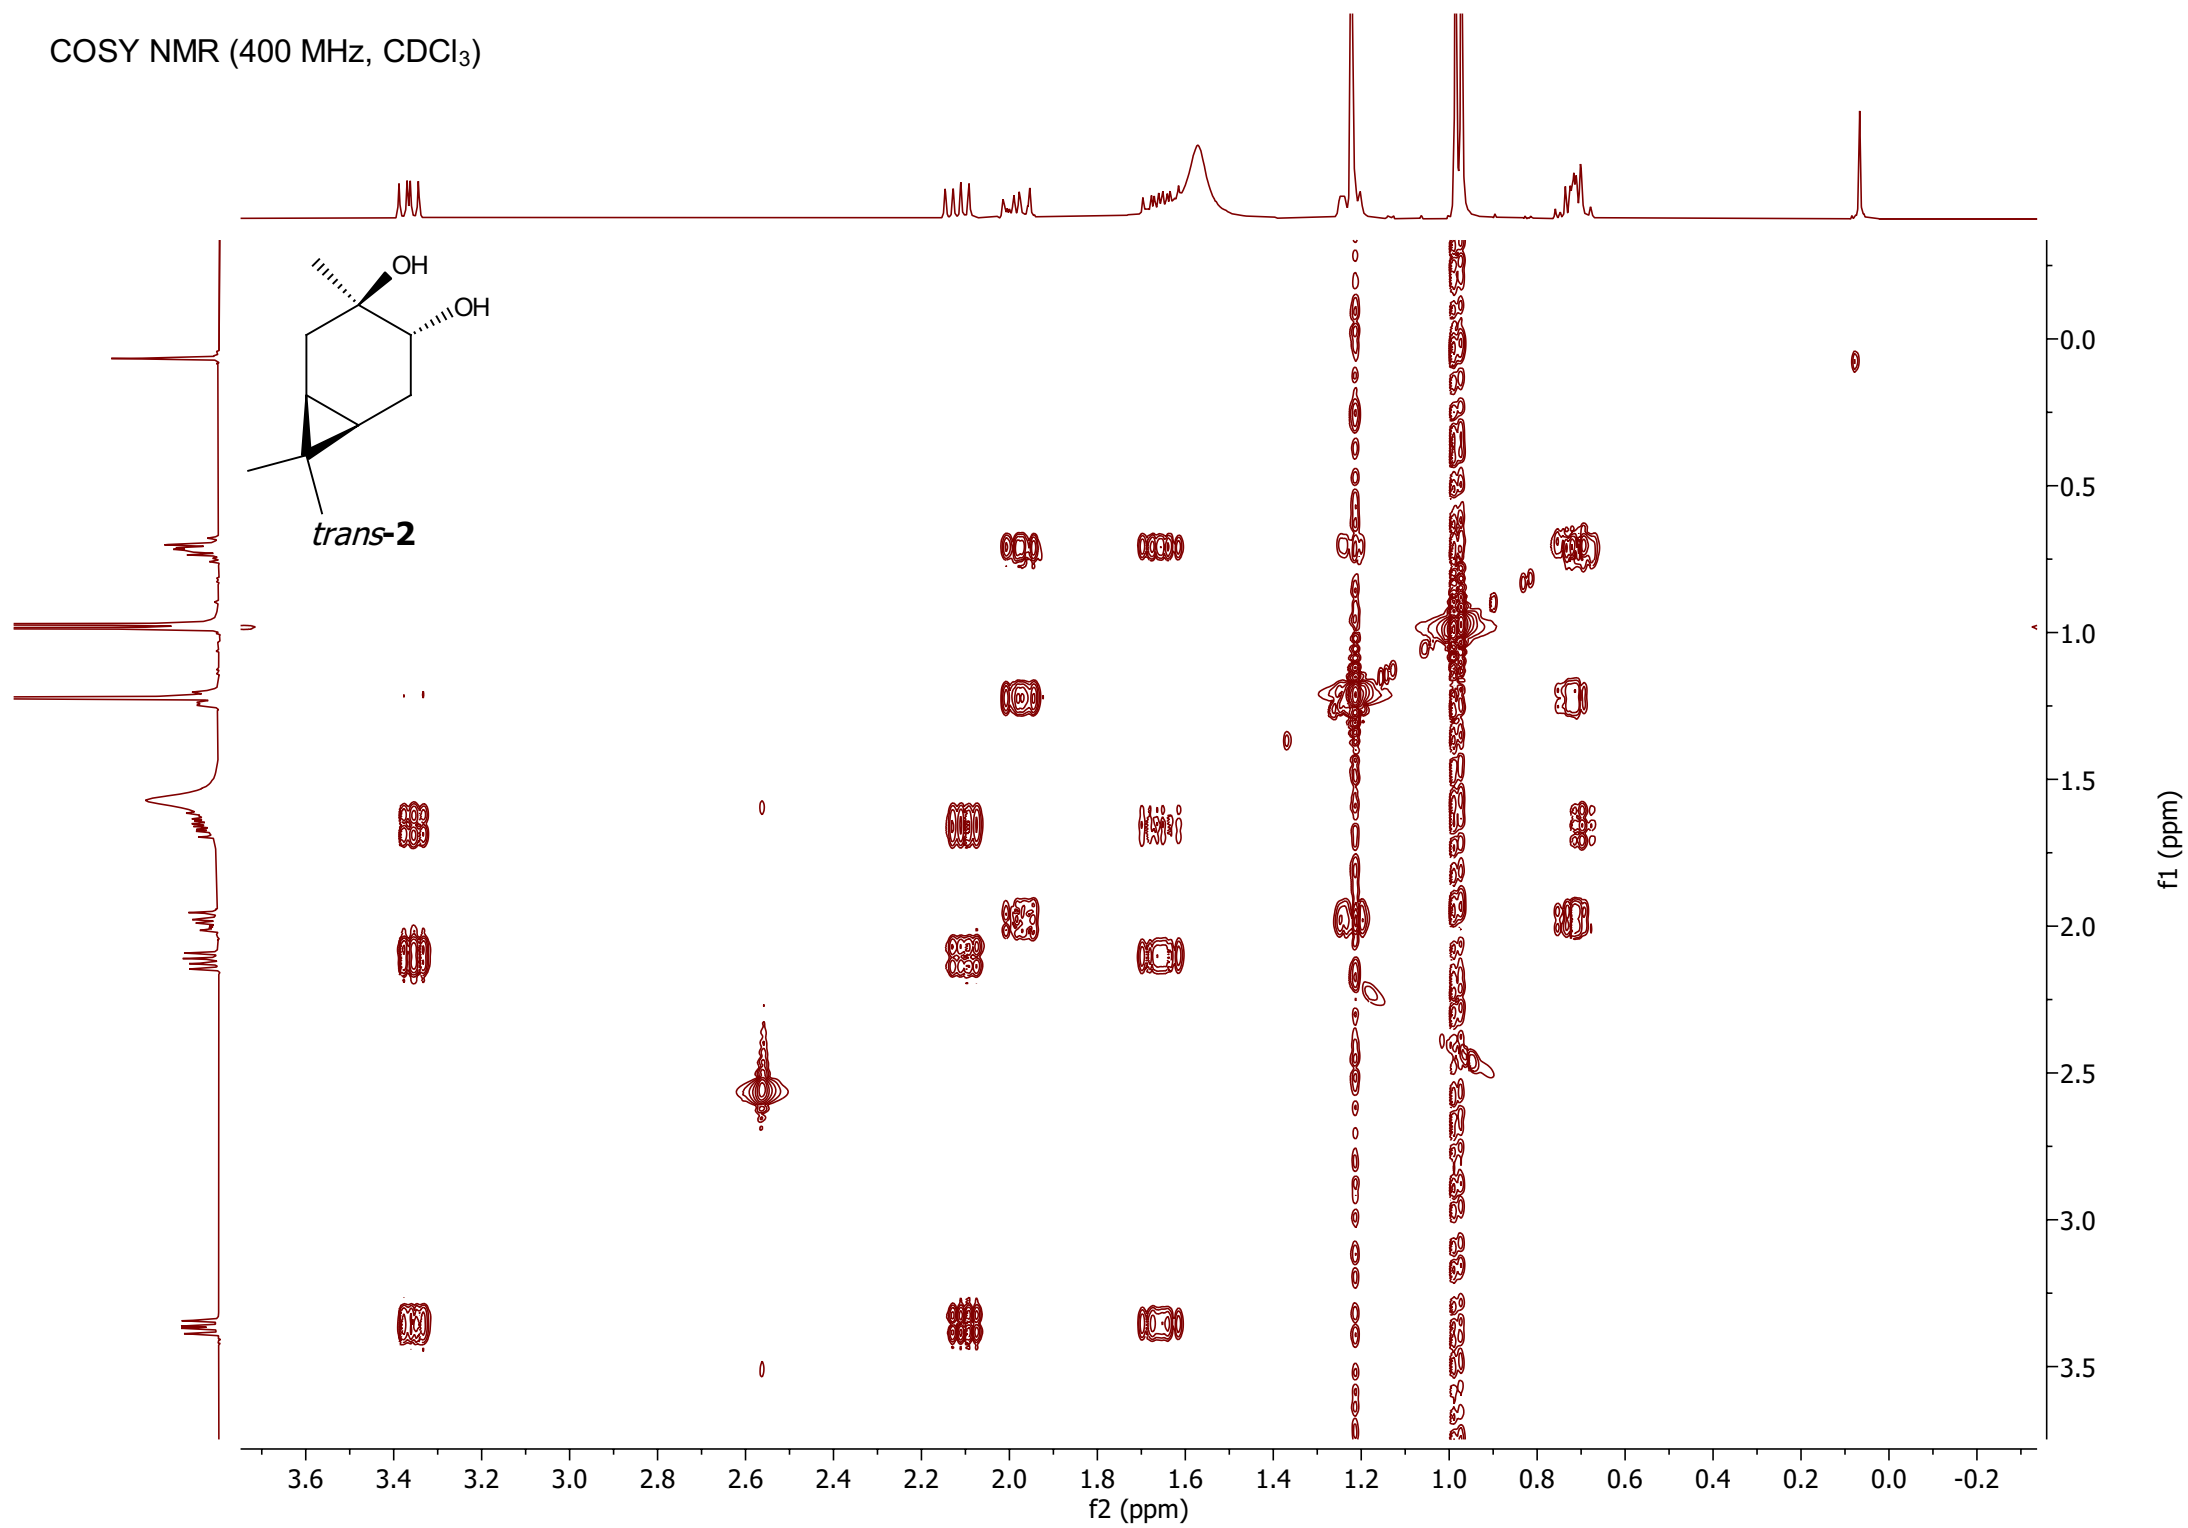

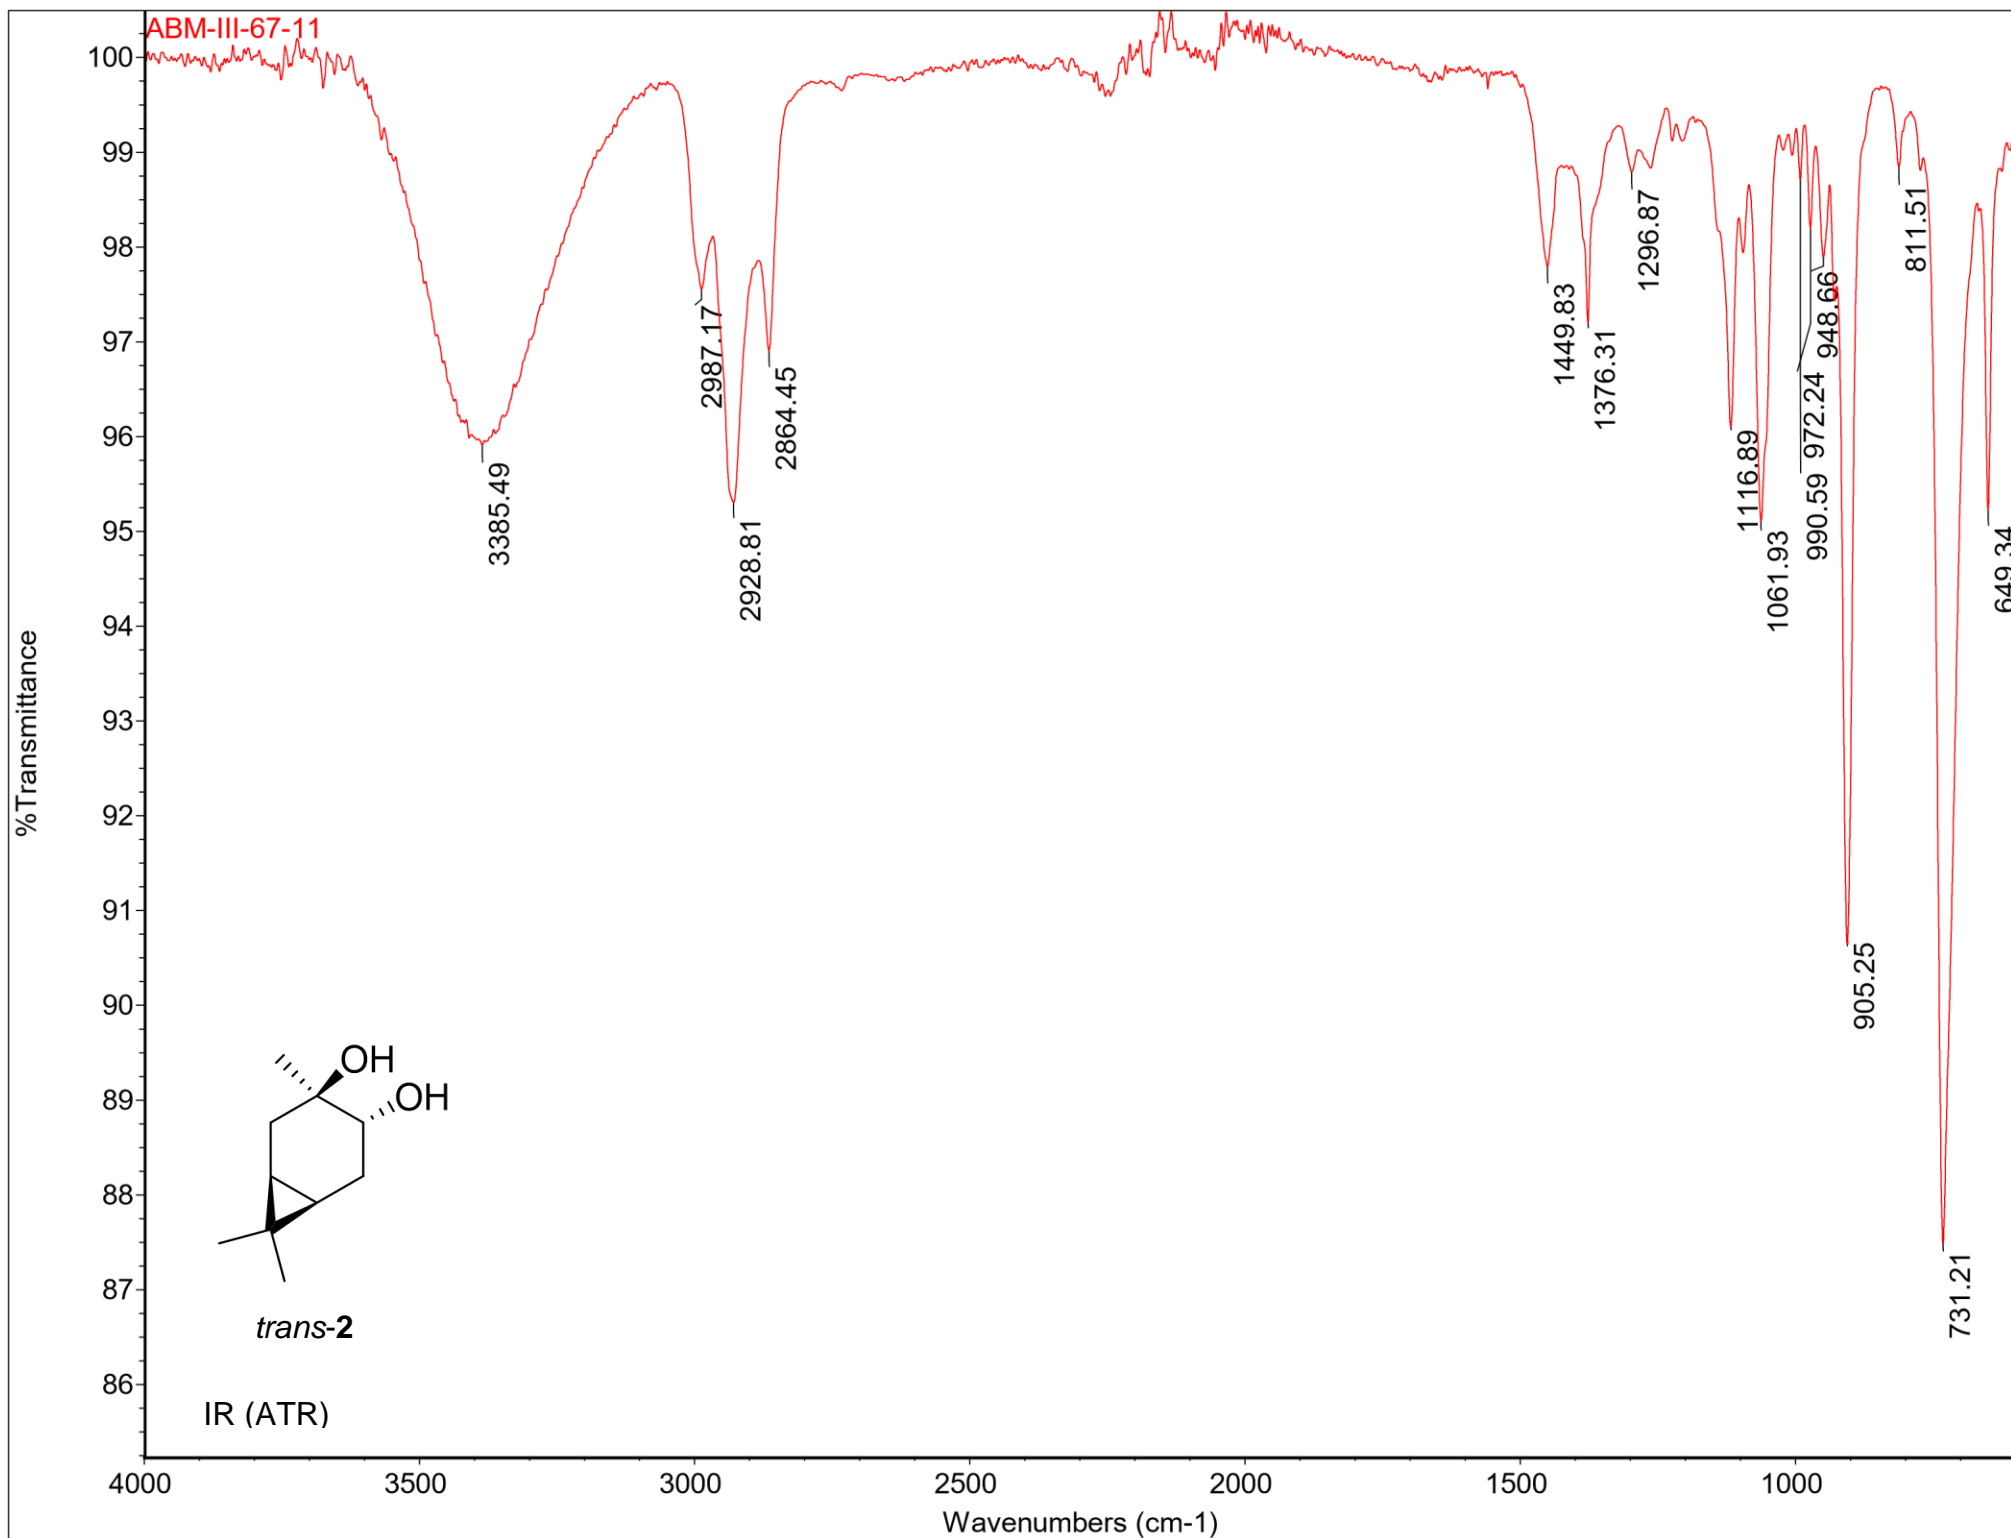

$^1\text{H}$  NMR (400 MHz,  $\text{CDCl}_3$ )

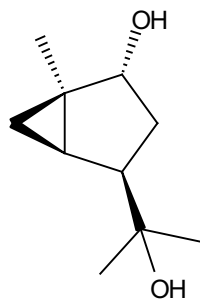

**3**

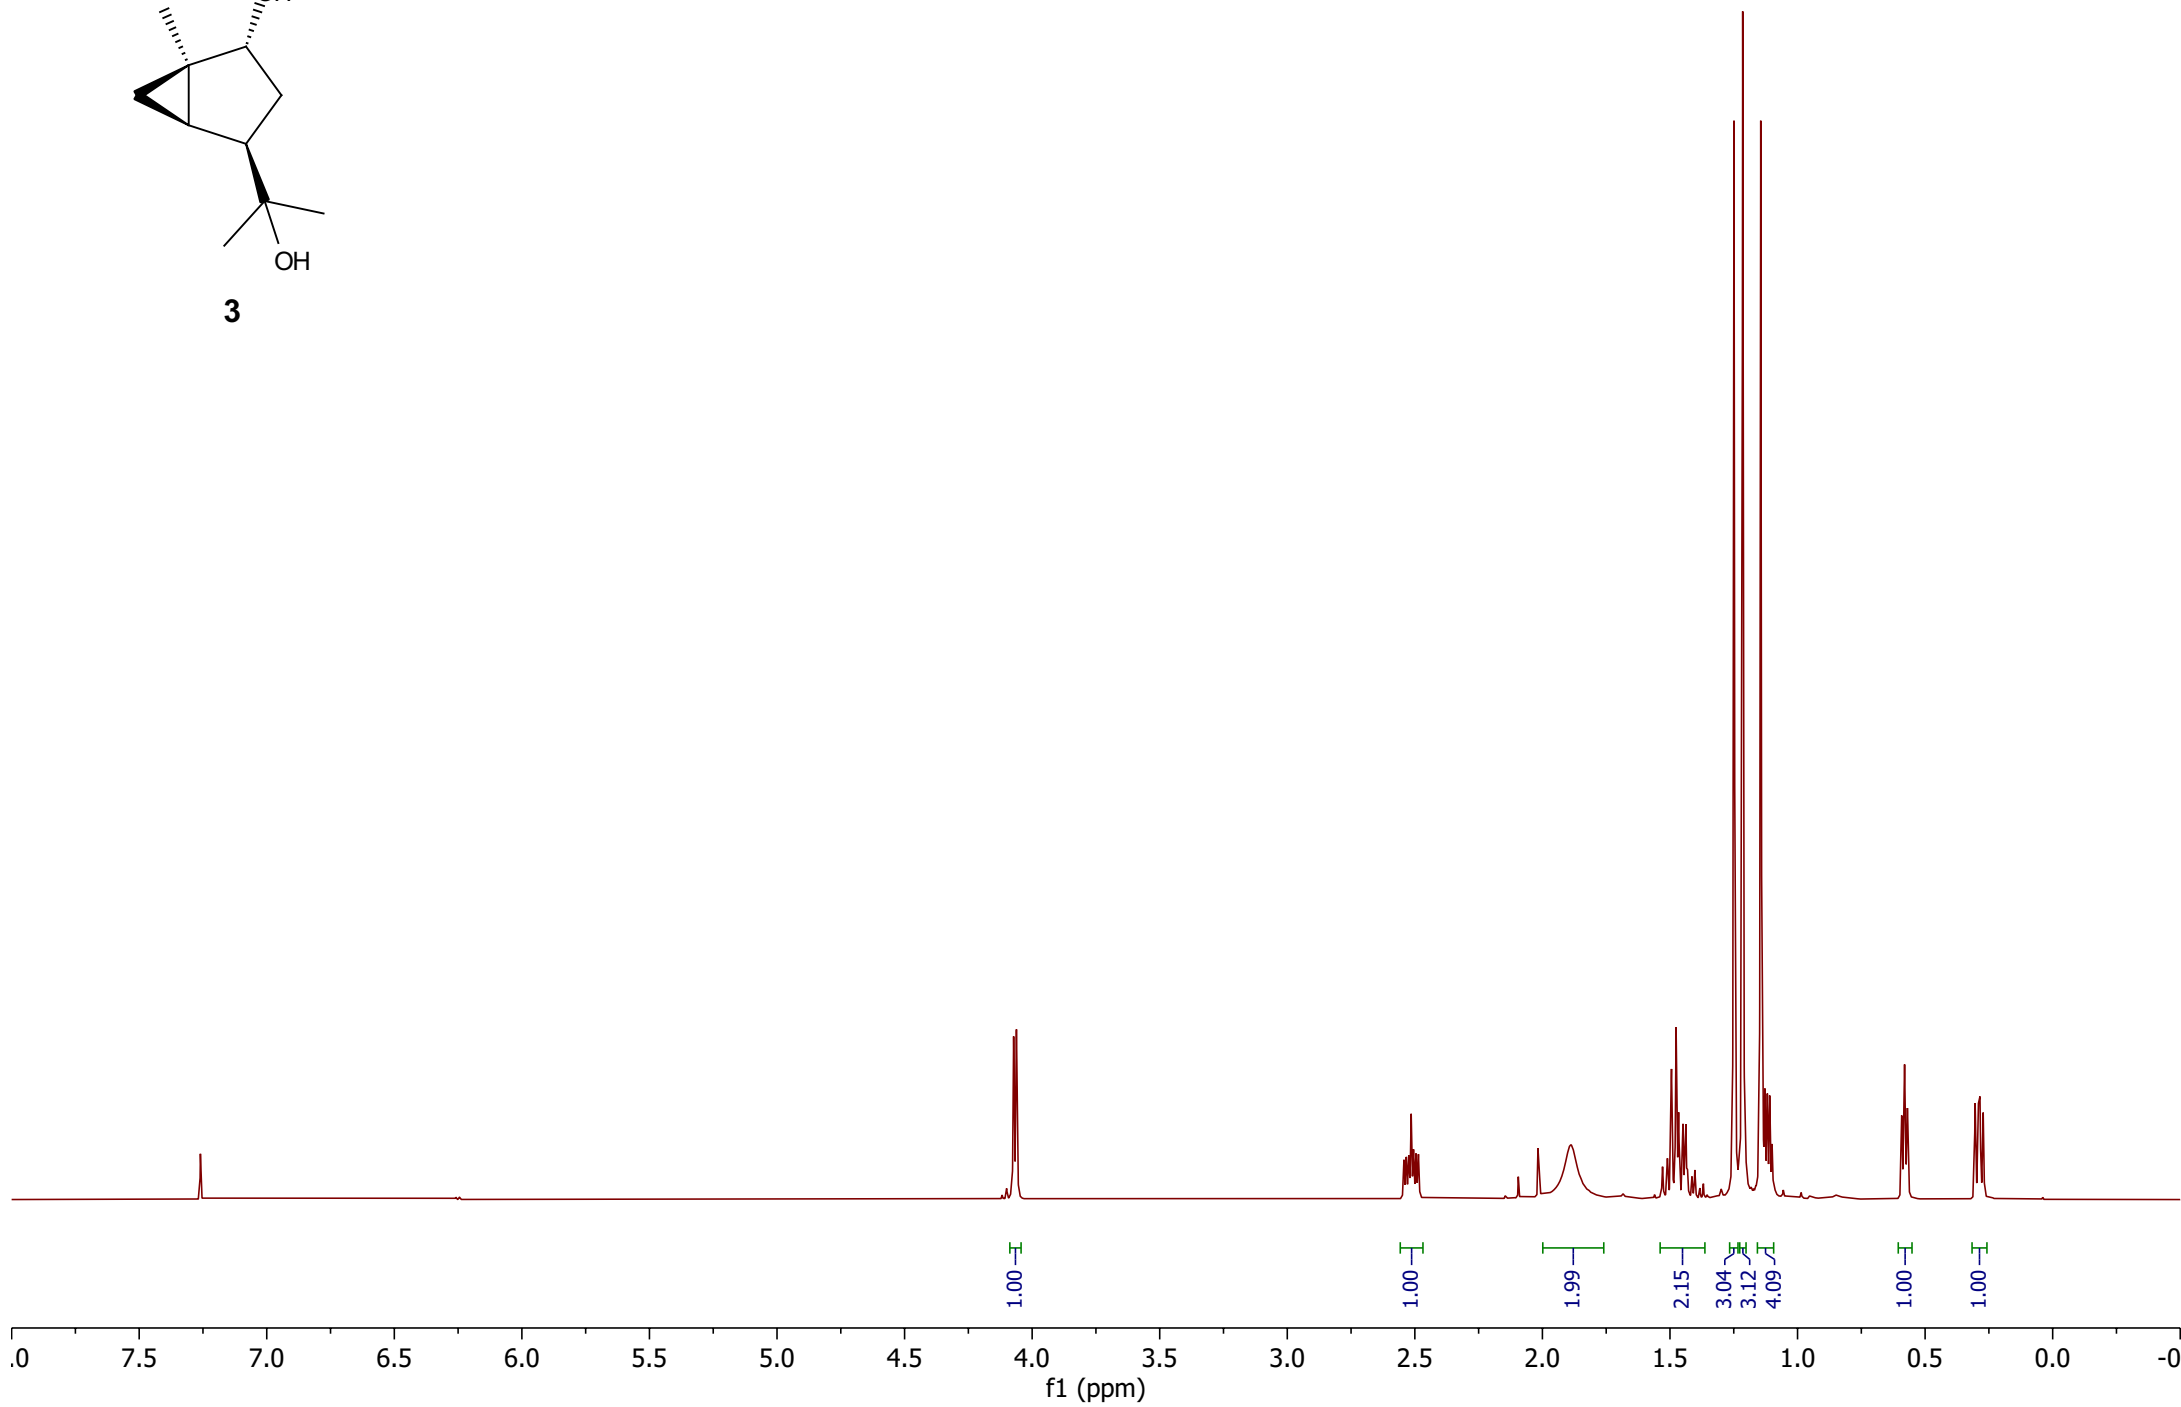

$^{13}\text{C}$   $\{^1\text{H}\}$  NMR (101 MHz,  $\text{CDCl}_3$ )



**3**

77.16  $\text{CDCl}_3$

76.70

72.59

48.19

32.45

29.48

27.82

26.56

24.09

16.54

13.17

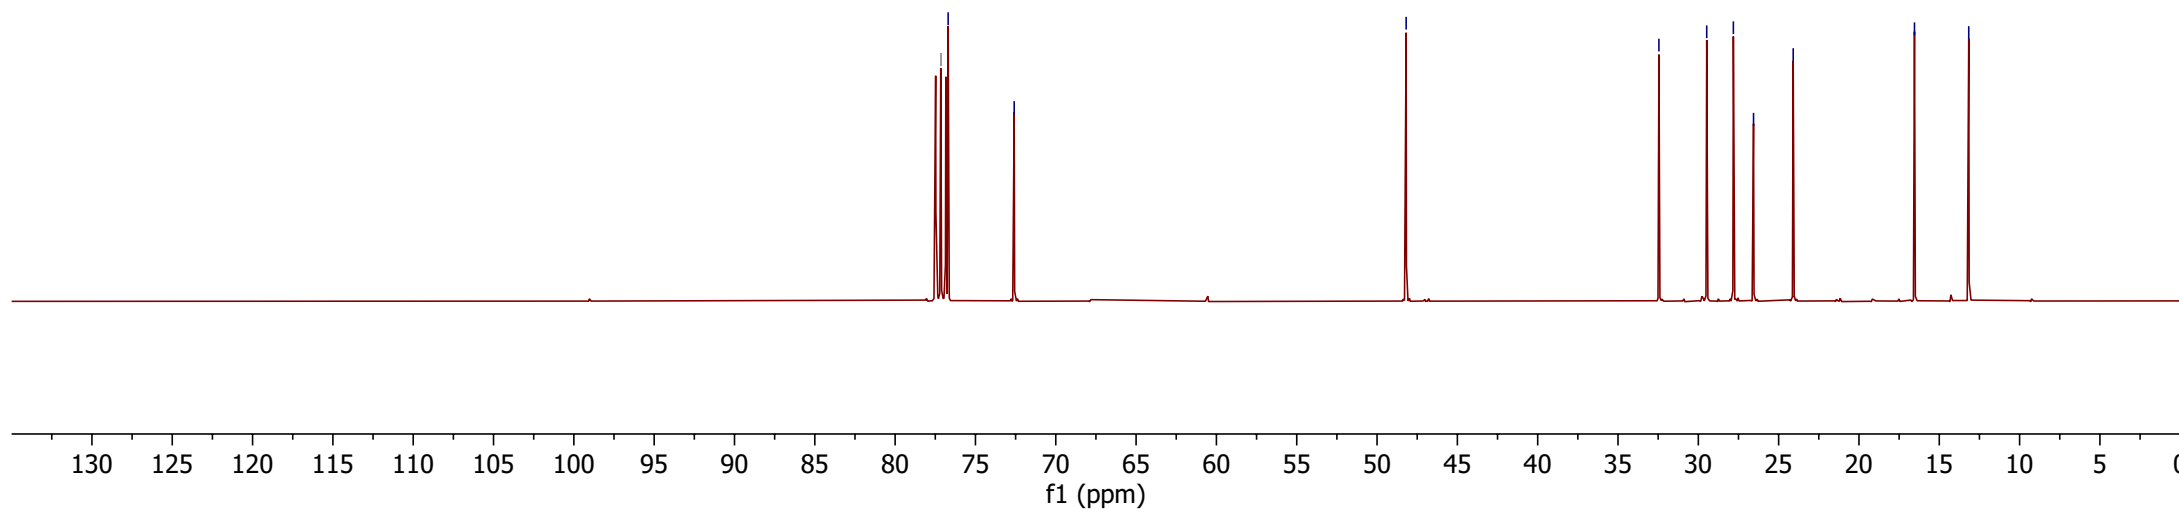

HSQC NMR ( $^1\text{H}$ - $^{13}\text{C}$ ,  $\text{CDCl}_3$ )

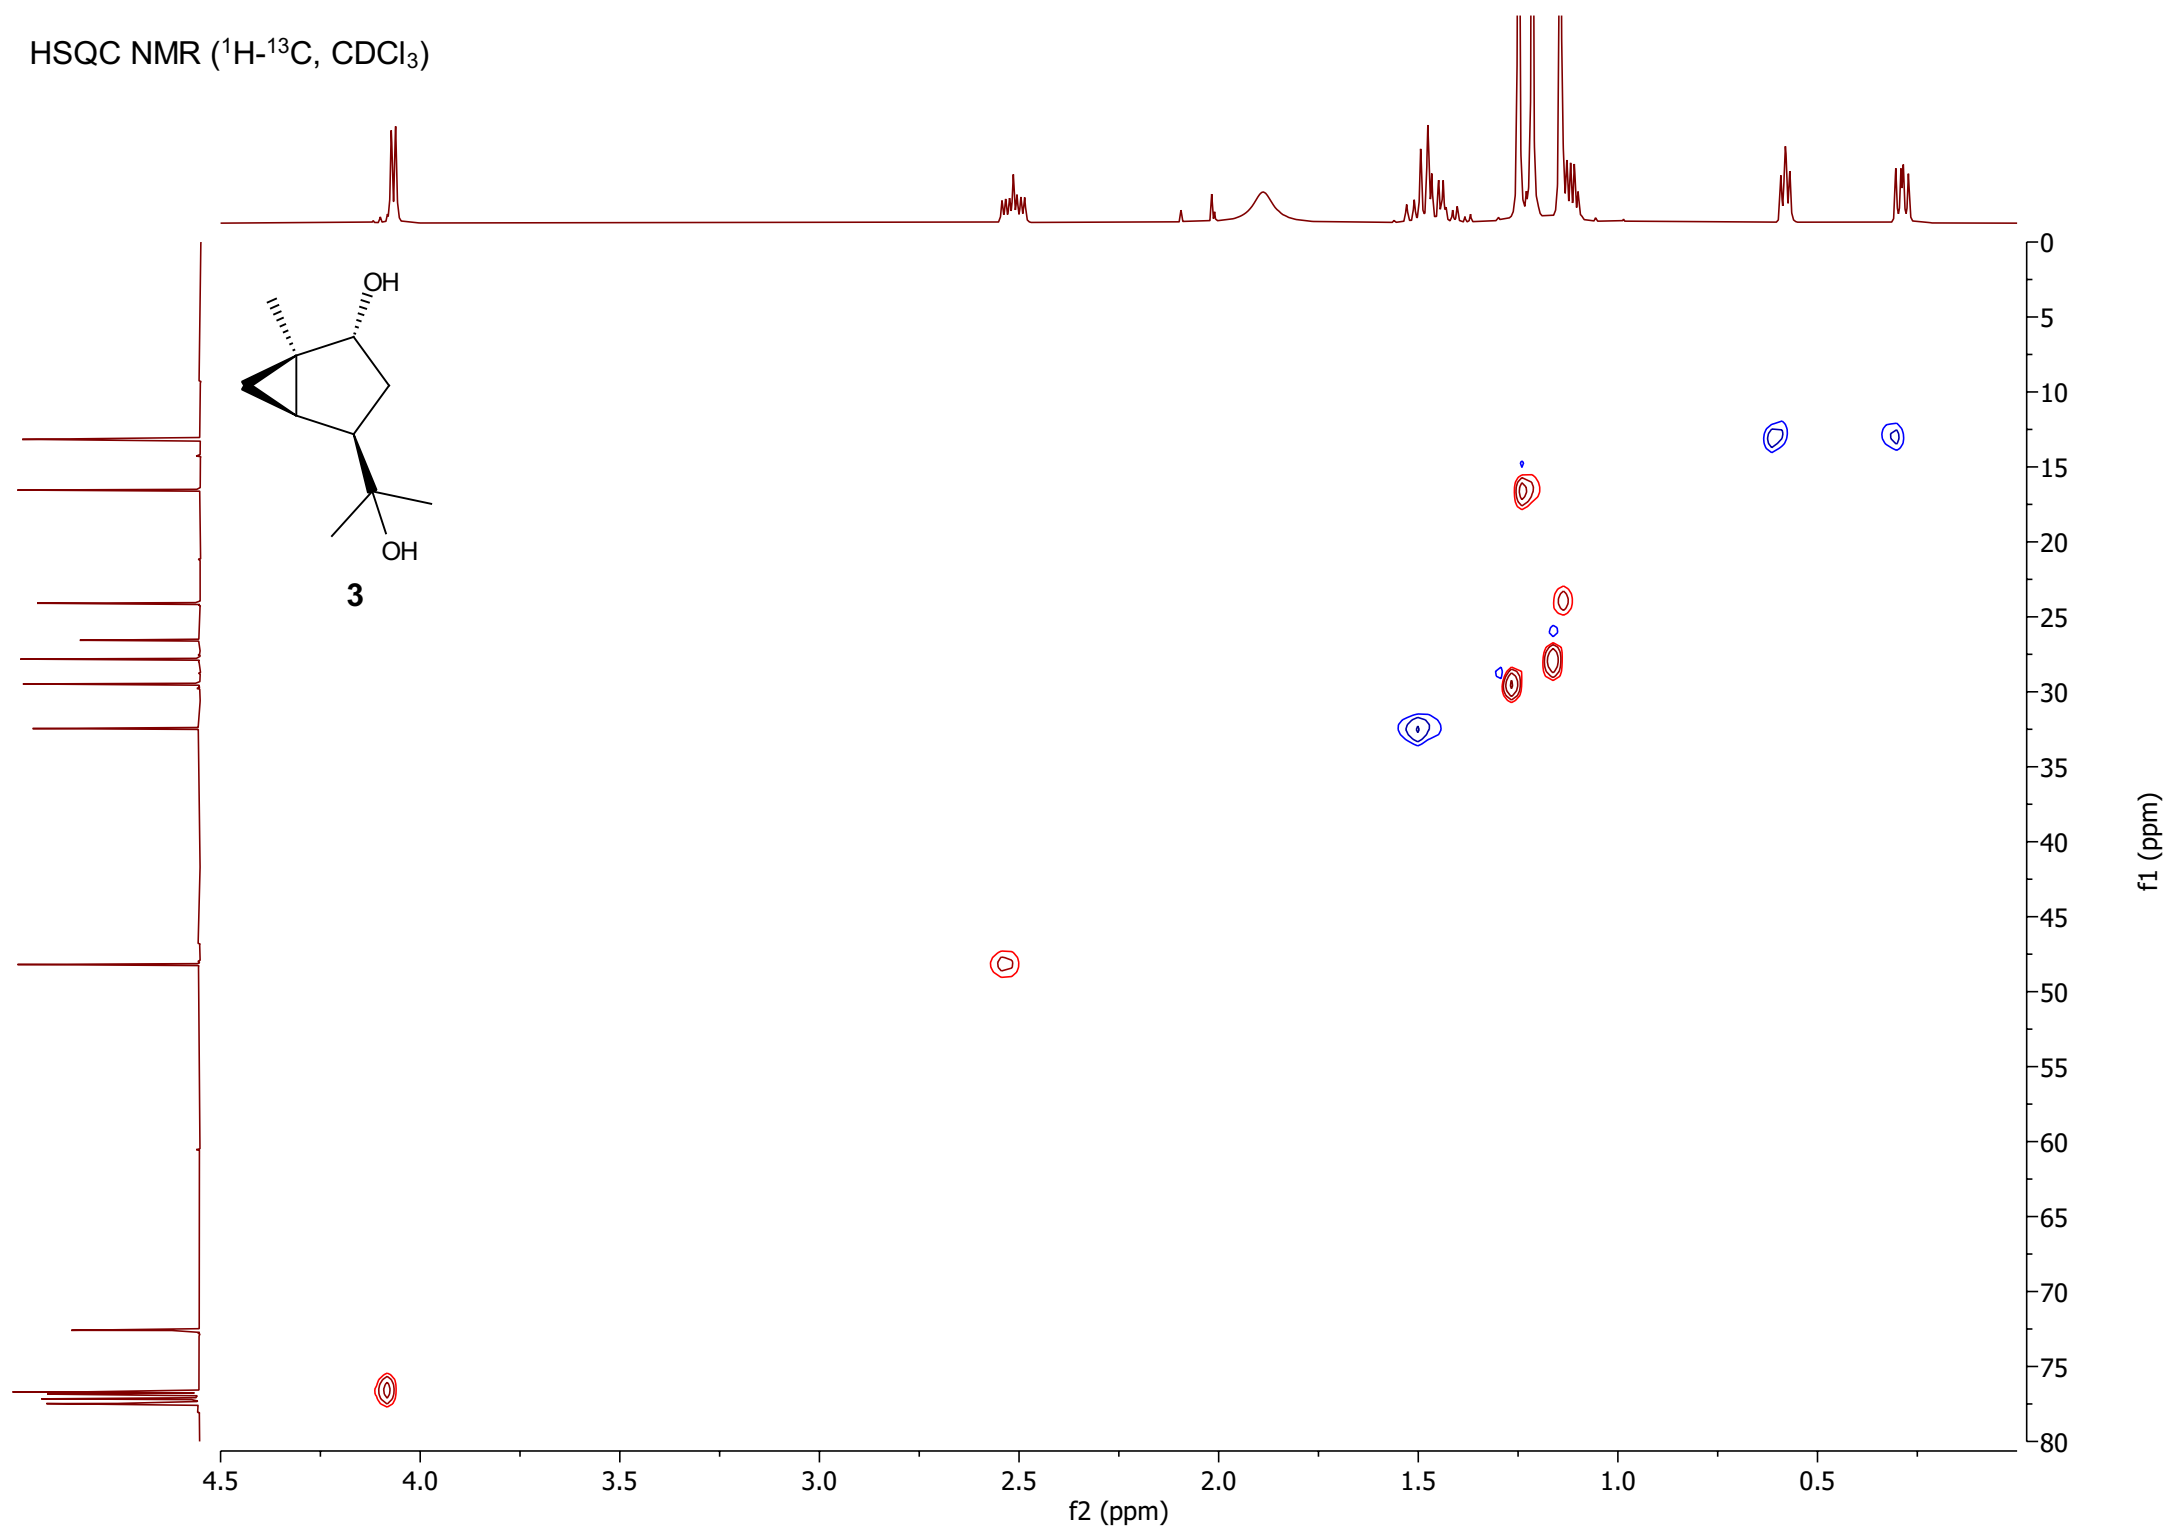



COSY NMR (400 MHz, CDCl<sub>3</sub>)

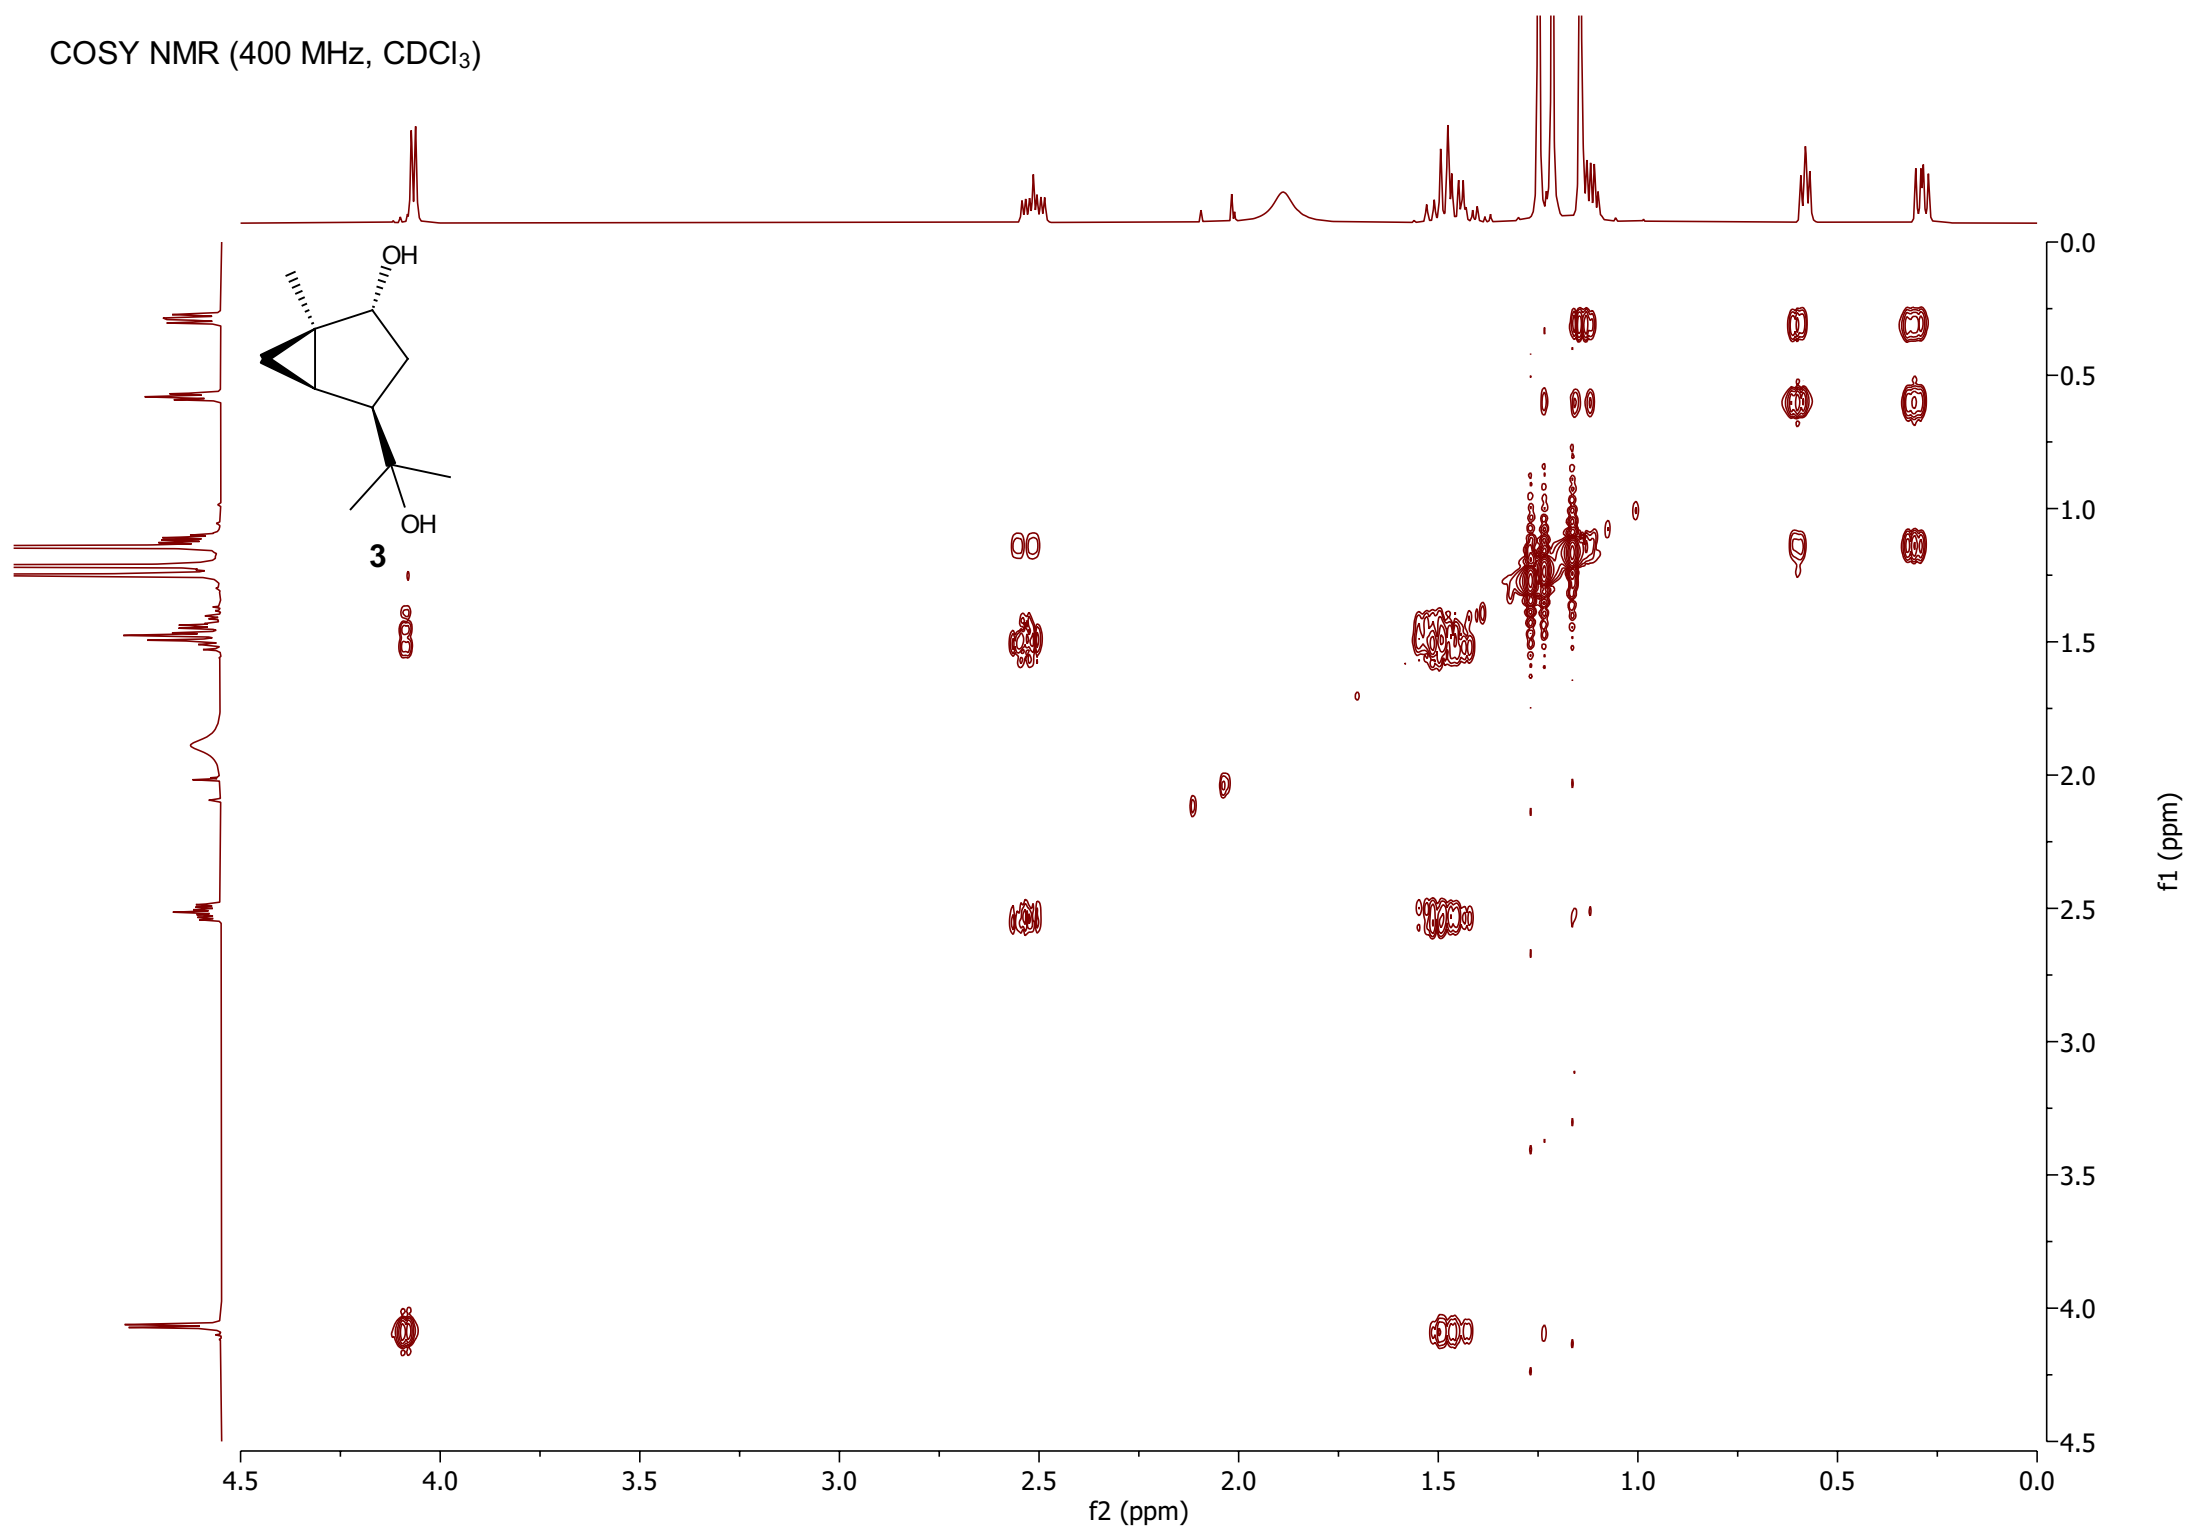

NOE NMR (400 MHz, CDCl<sub>3</sub>)

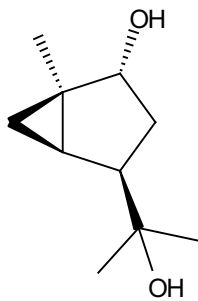

**3**

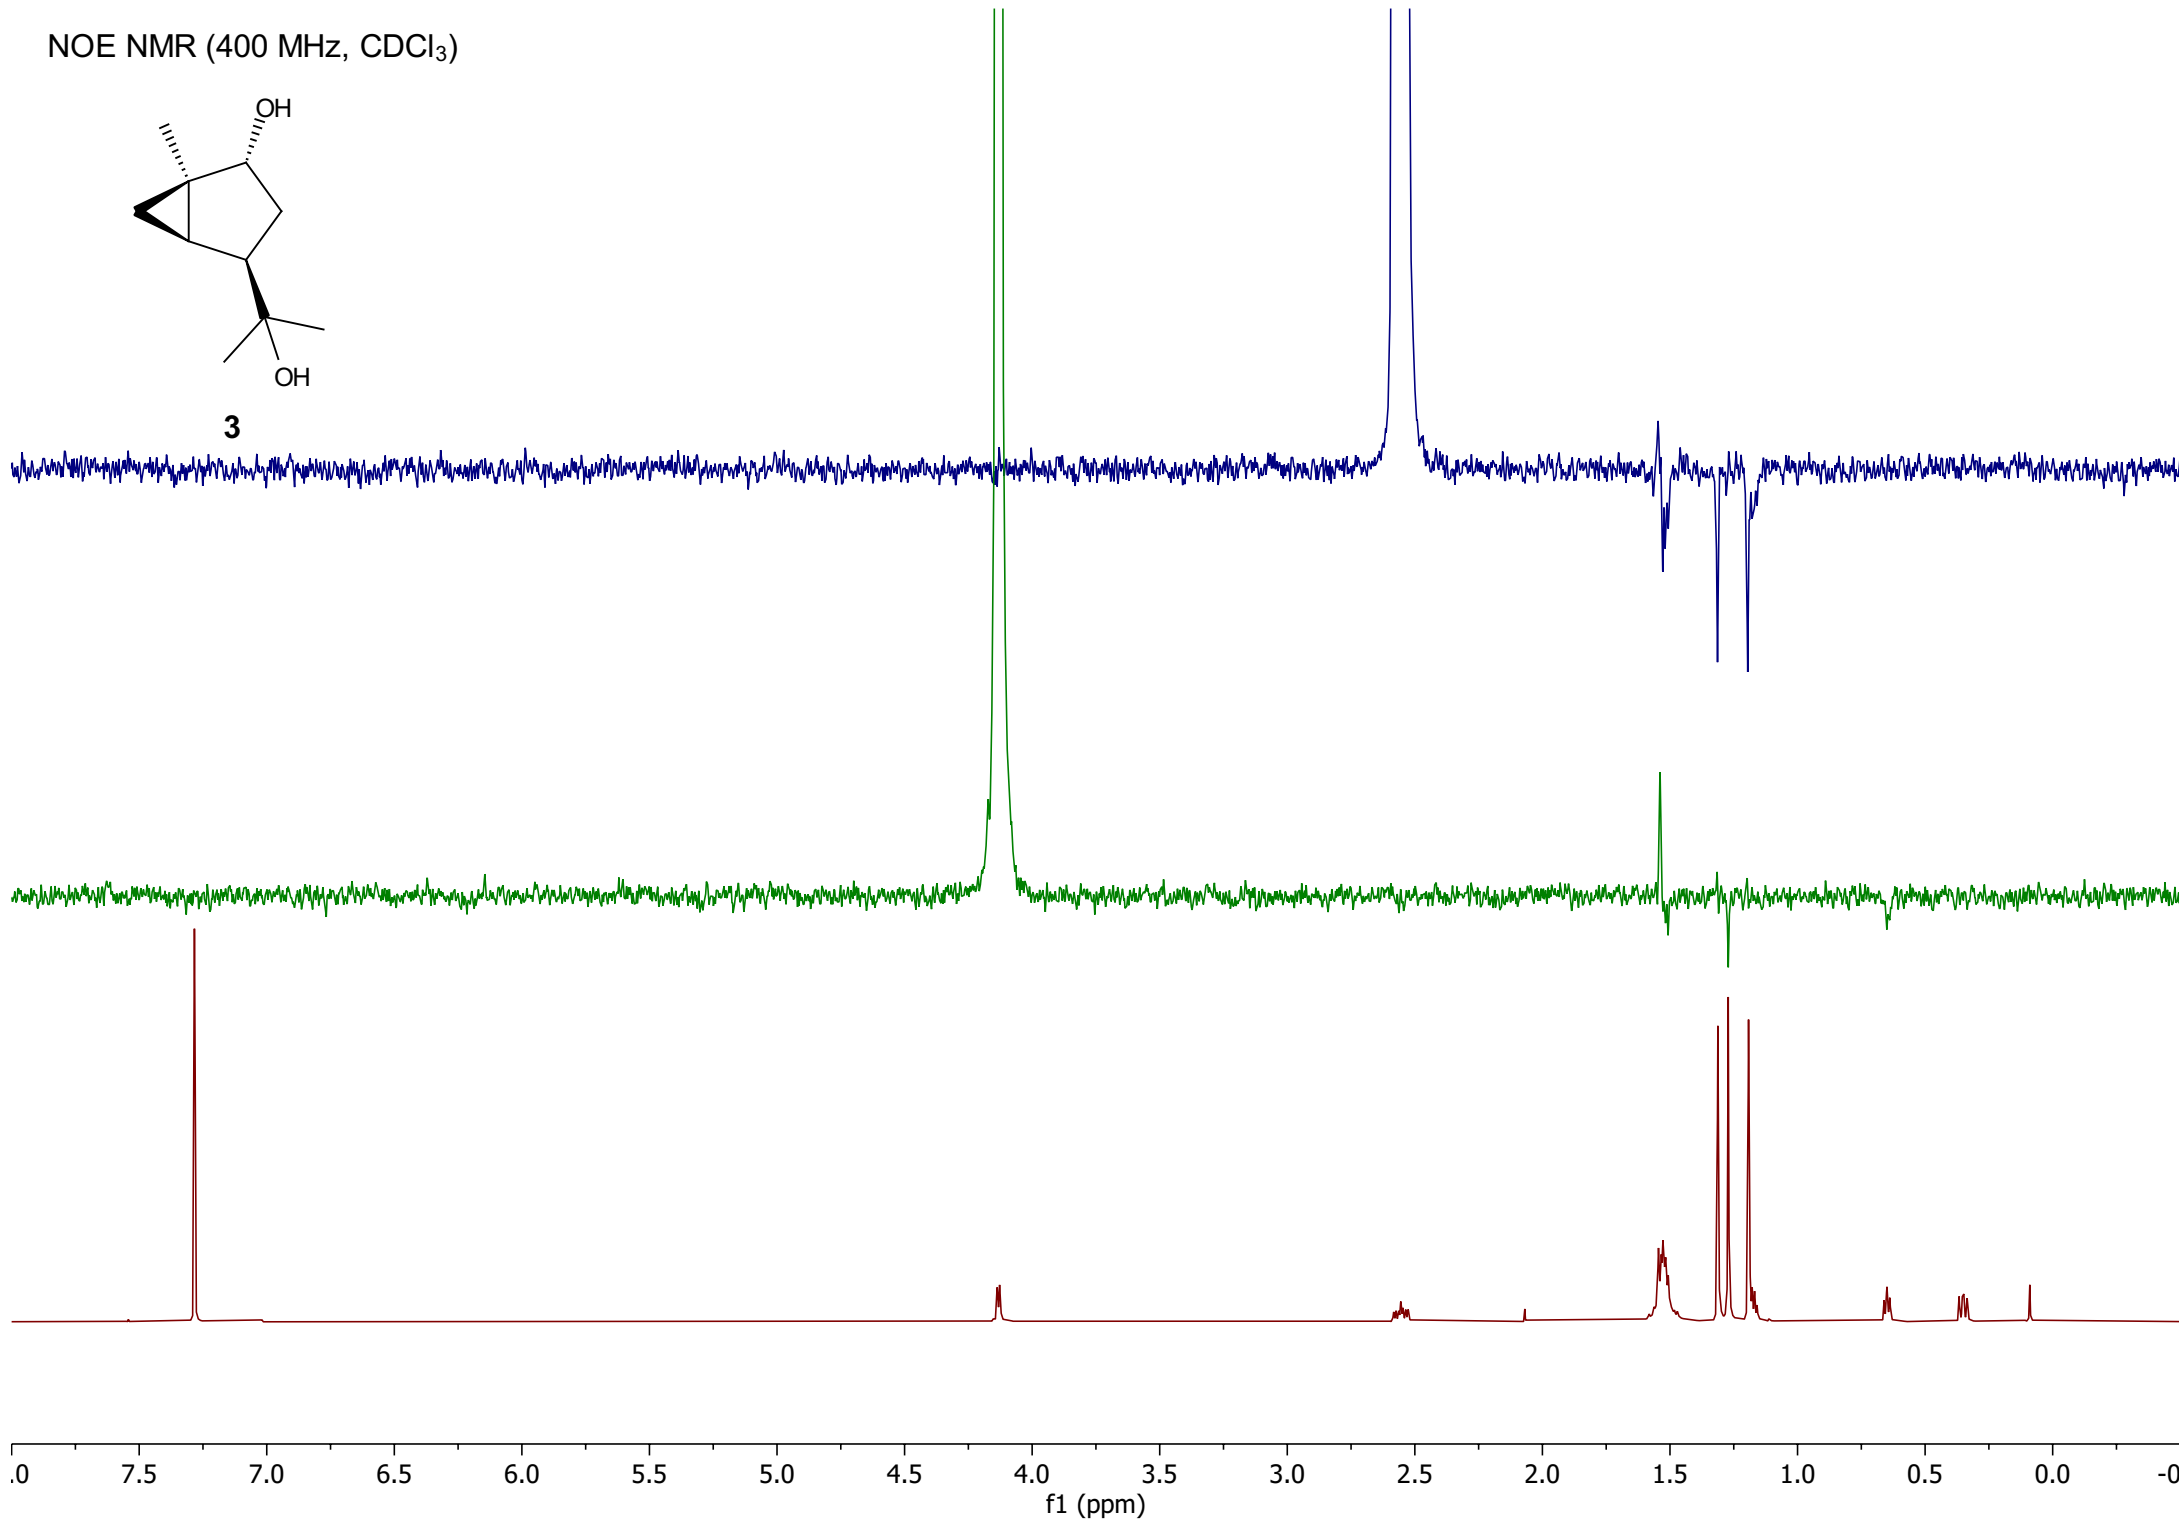

Wed Aug 04 10:31:41 2021 (GMT-07:00)

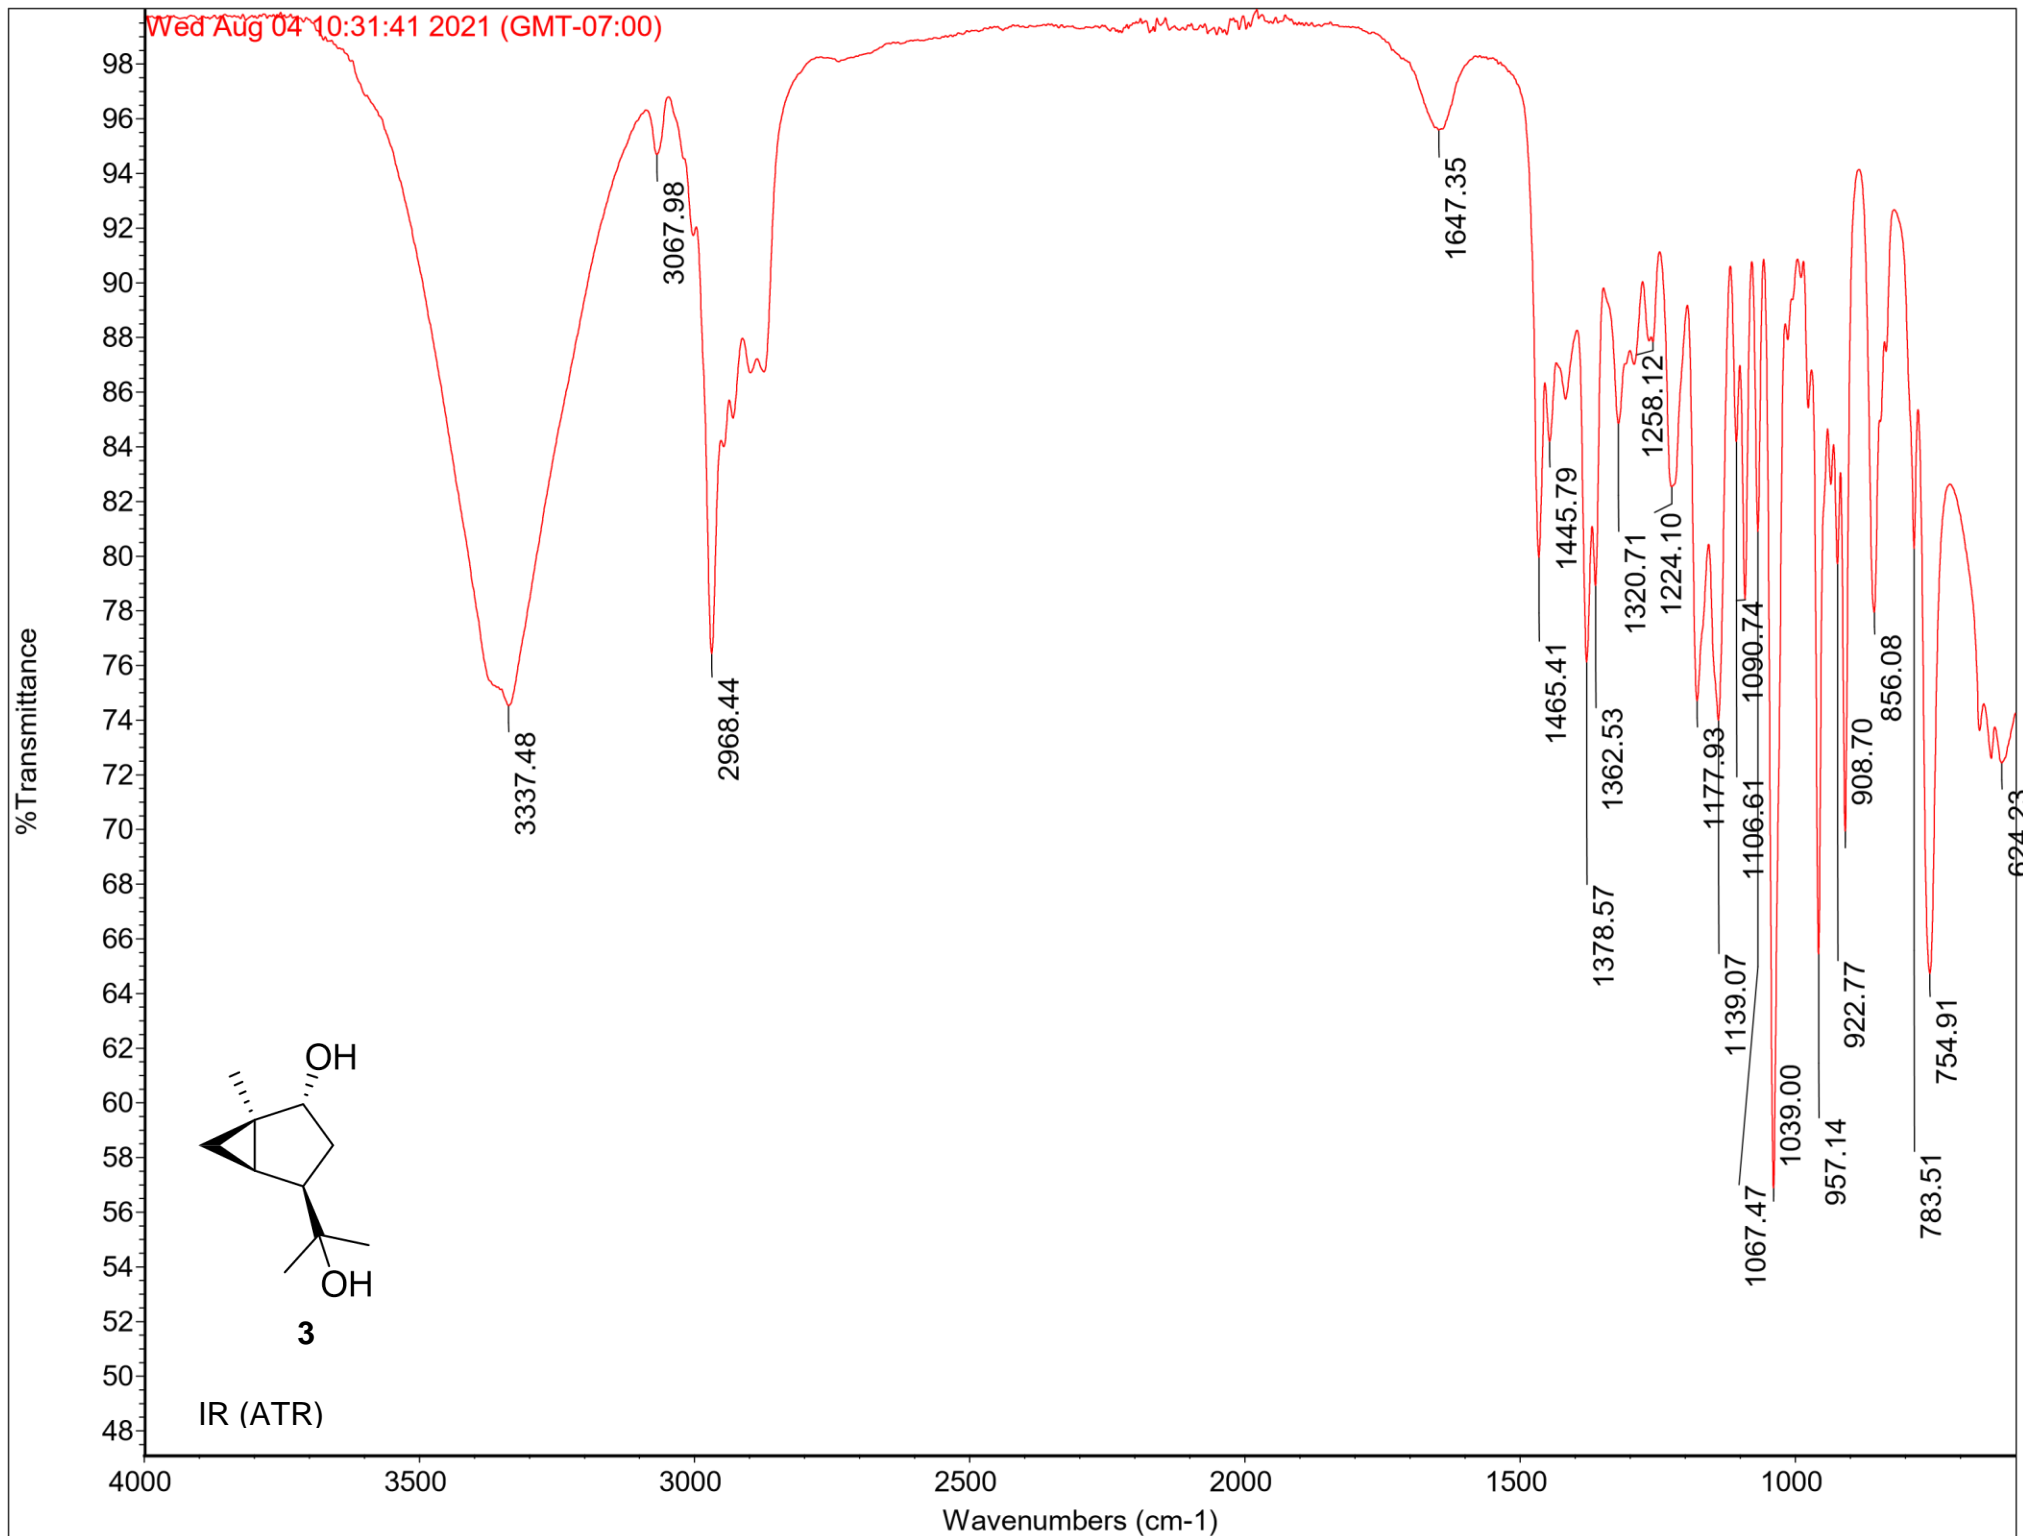

$^1\text{H}$  NMR (400 MHz,  $\text{CDCl}_3$ )

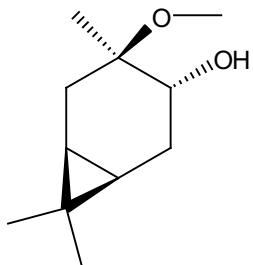

**5**

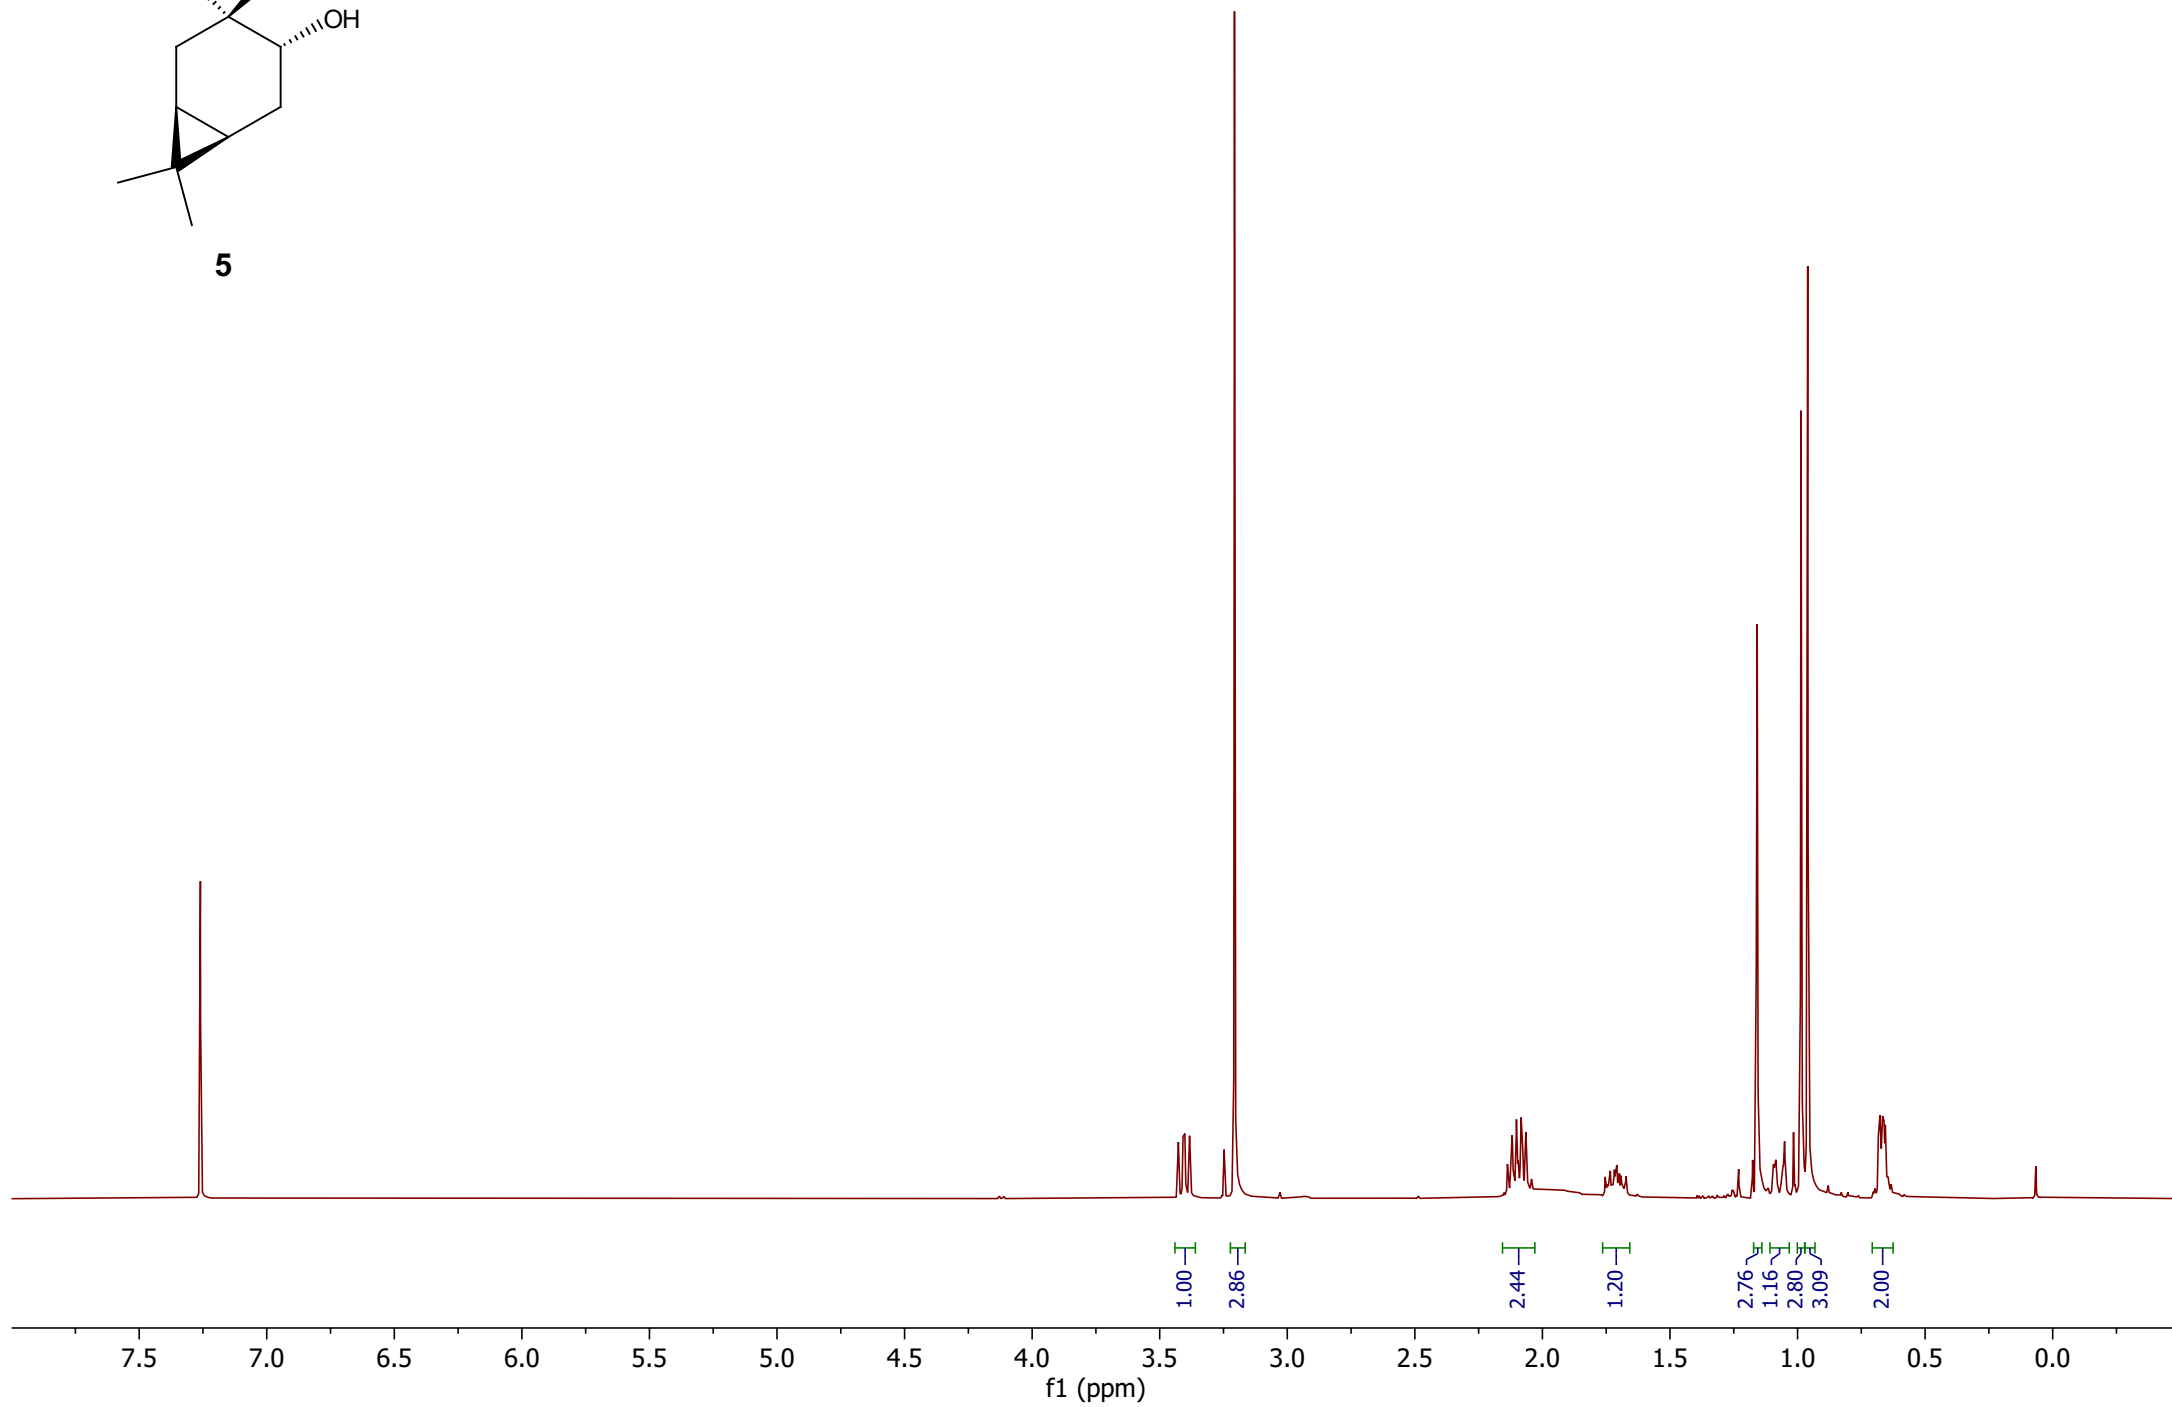

$^{13}\text{C}$  { $^1\text{H}$ } NMR (101 MHz,  $\text{CDCl}_3$ )



**5**

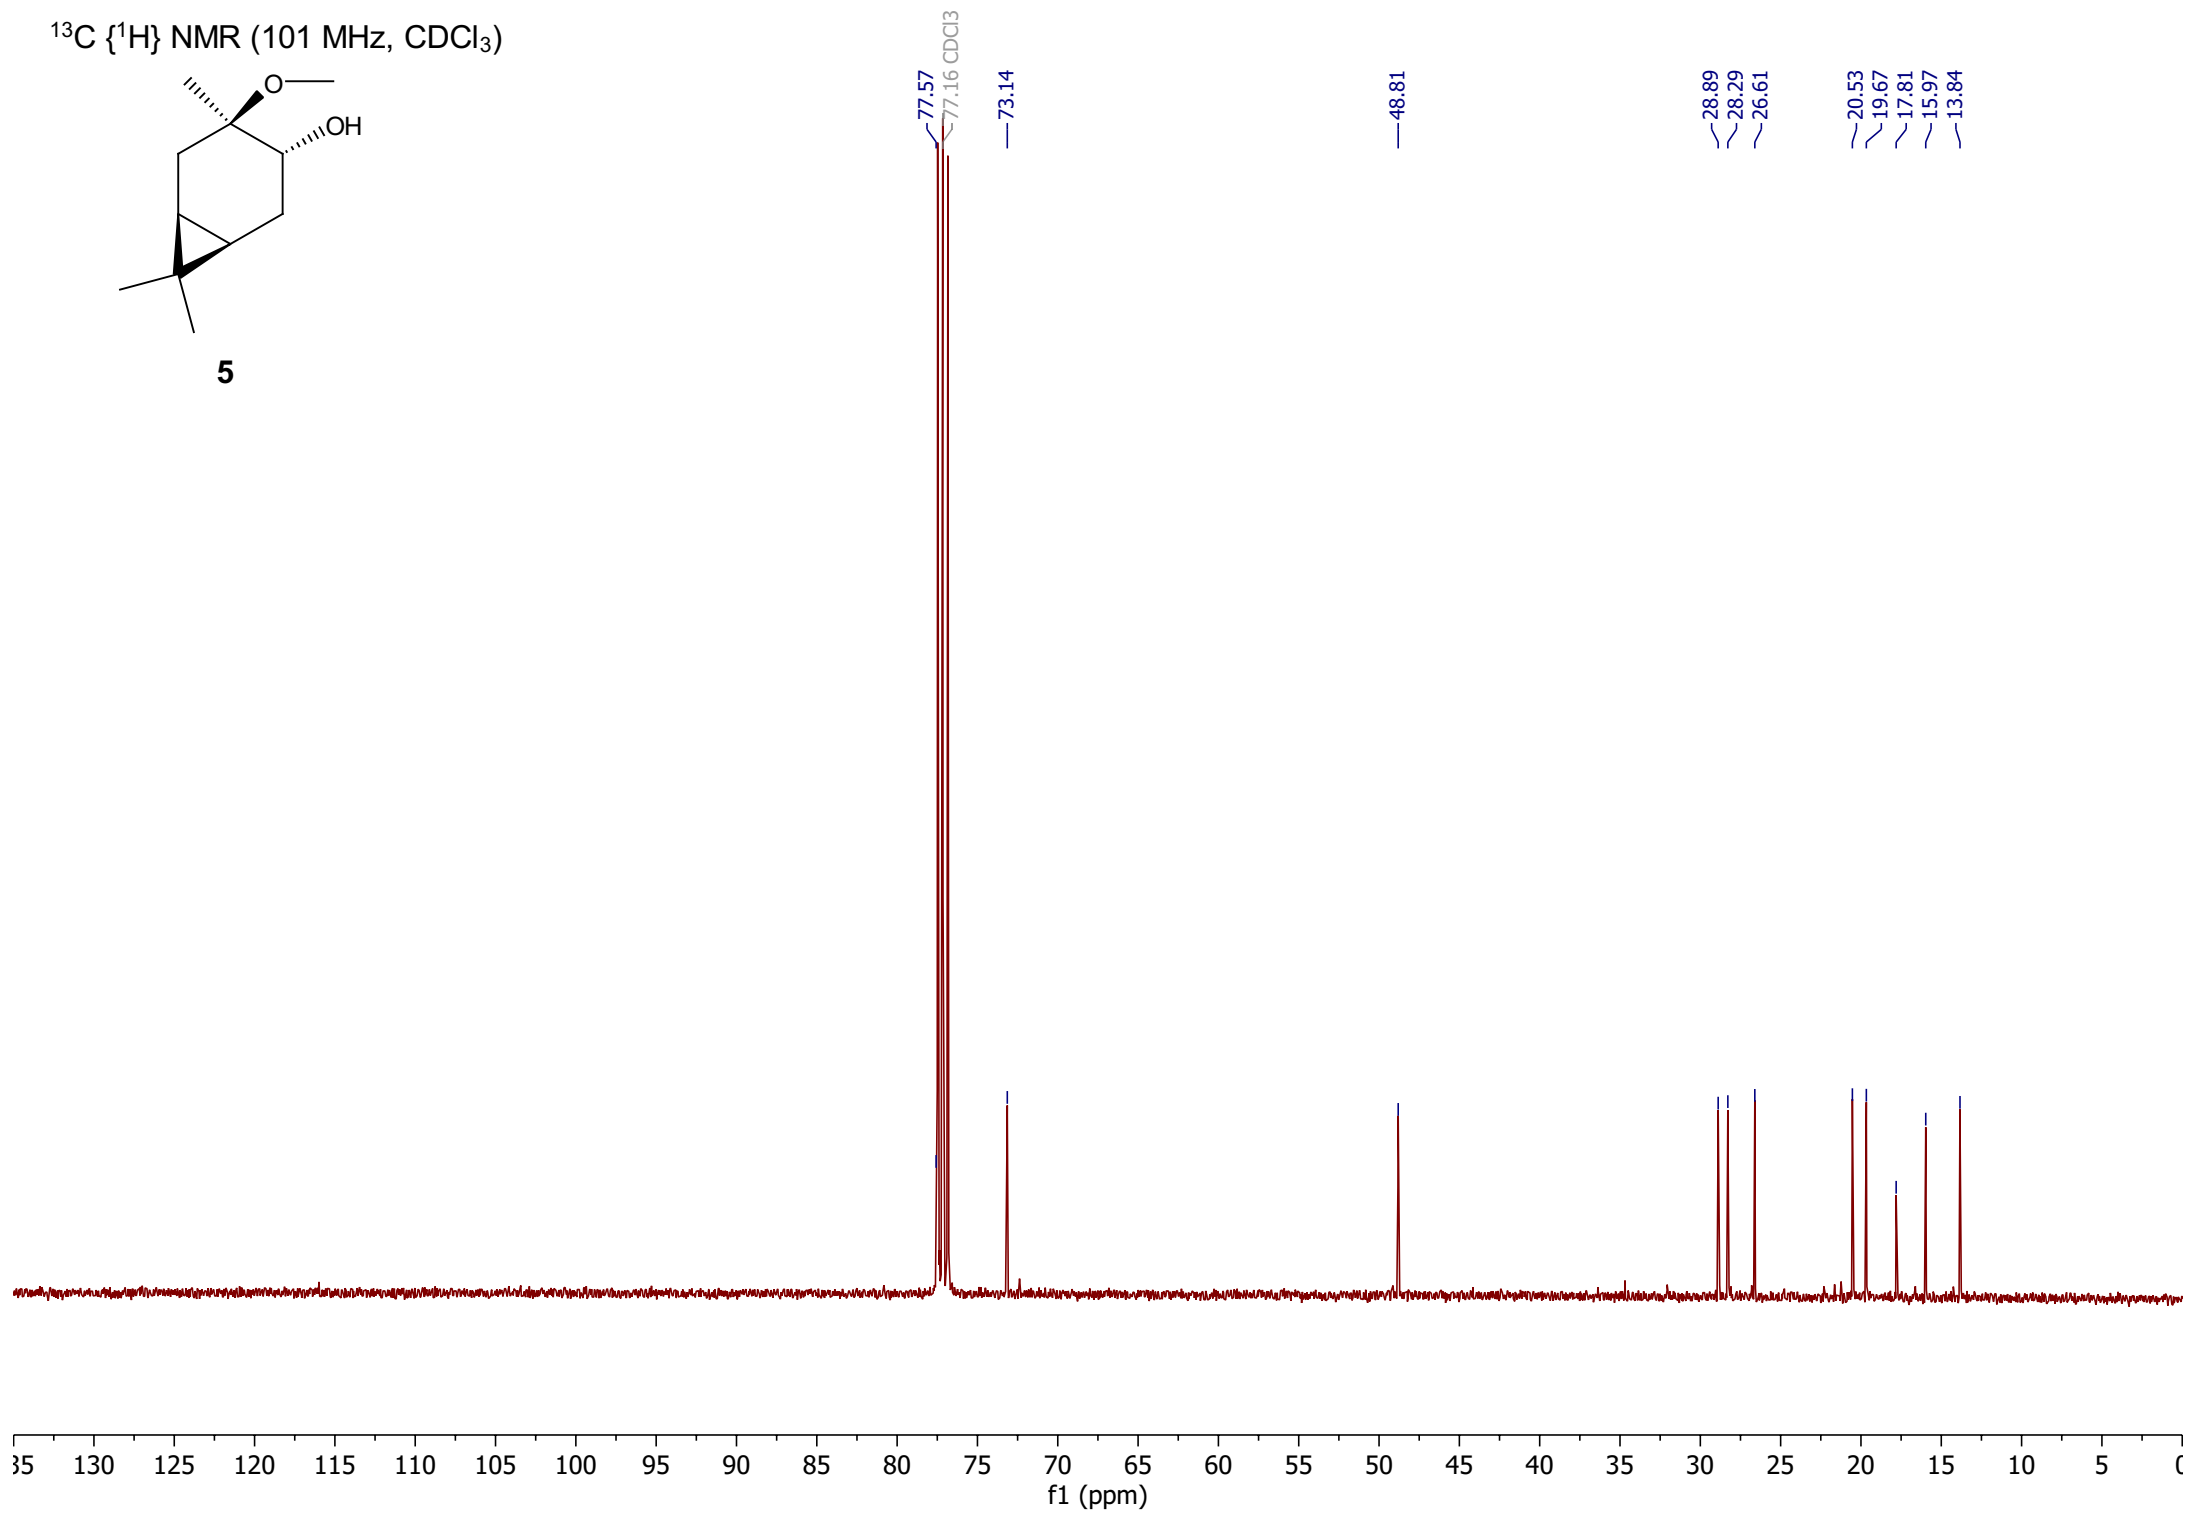

HSQC NMR ( $^1\text{H}$ - $^{13}\text{C}$ ,  $\text{CDCl}_3$ )

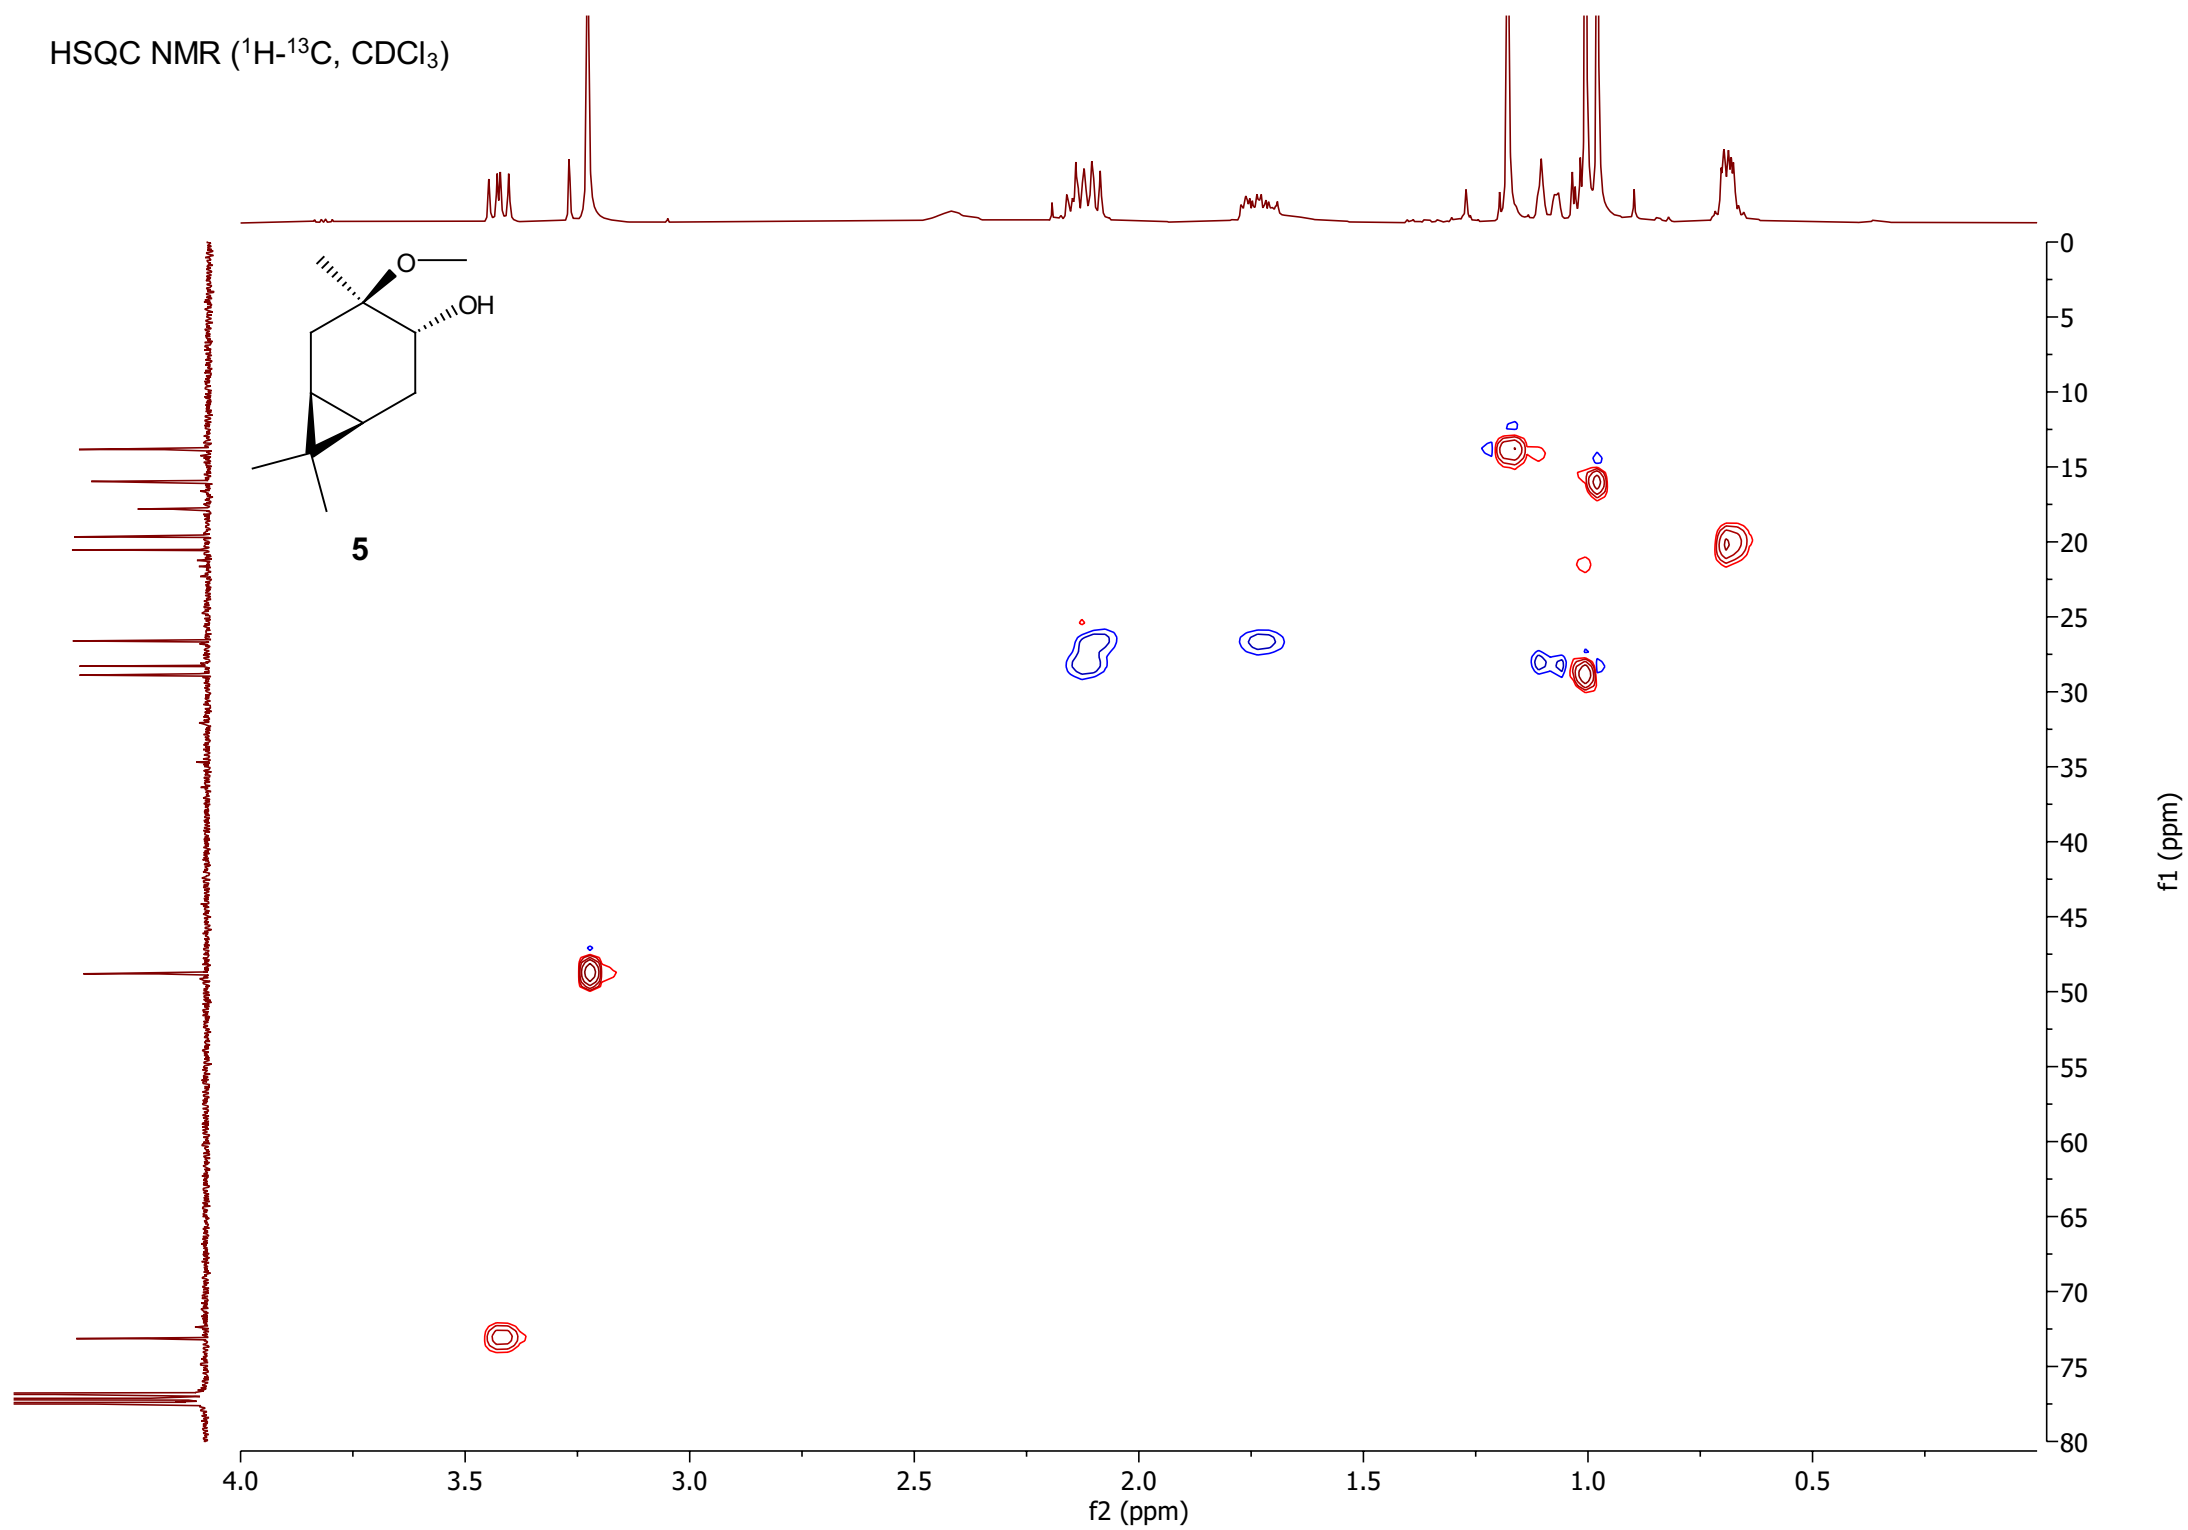

COSY NMR (400 MHz, CDCl<sub>3</sub>)

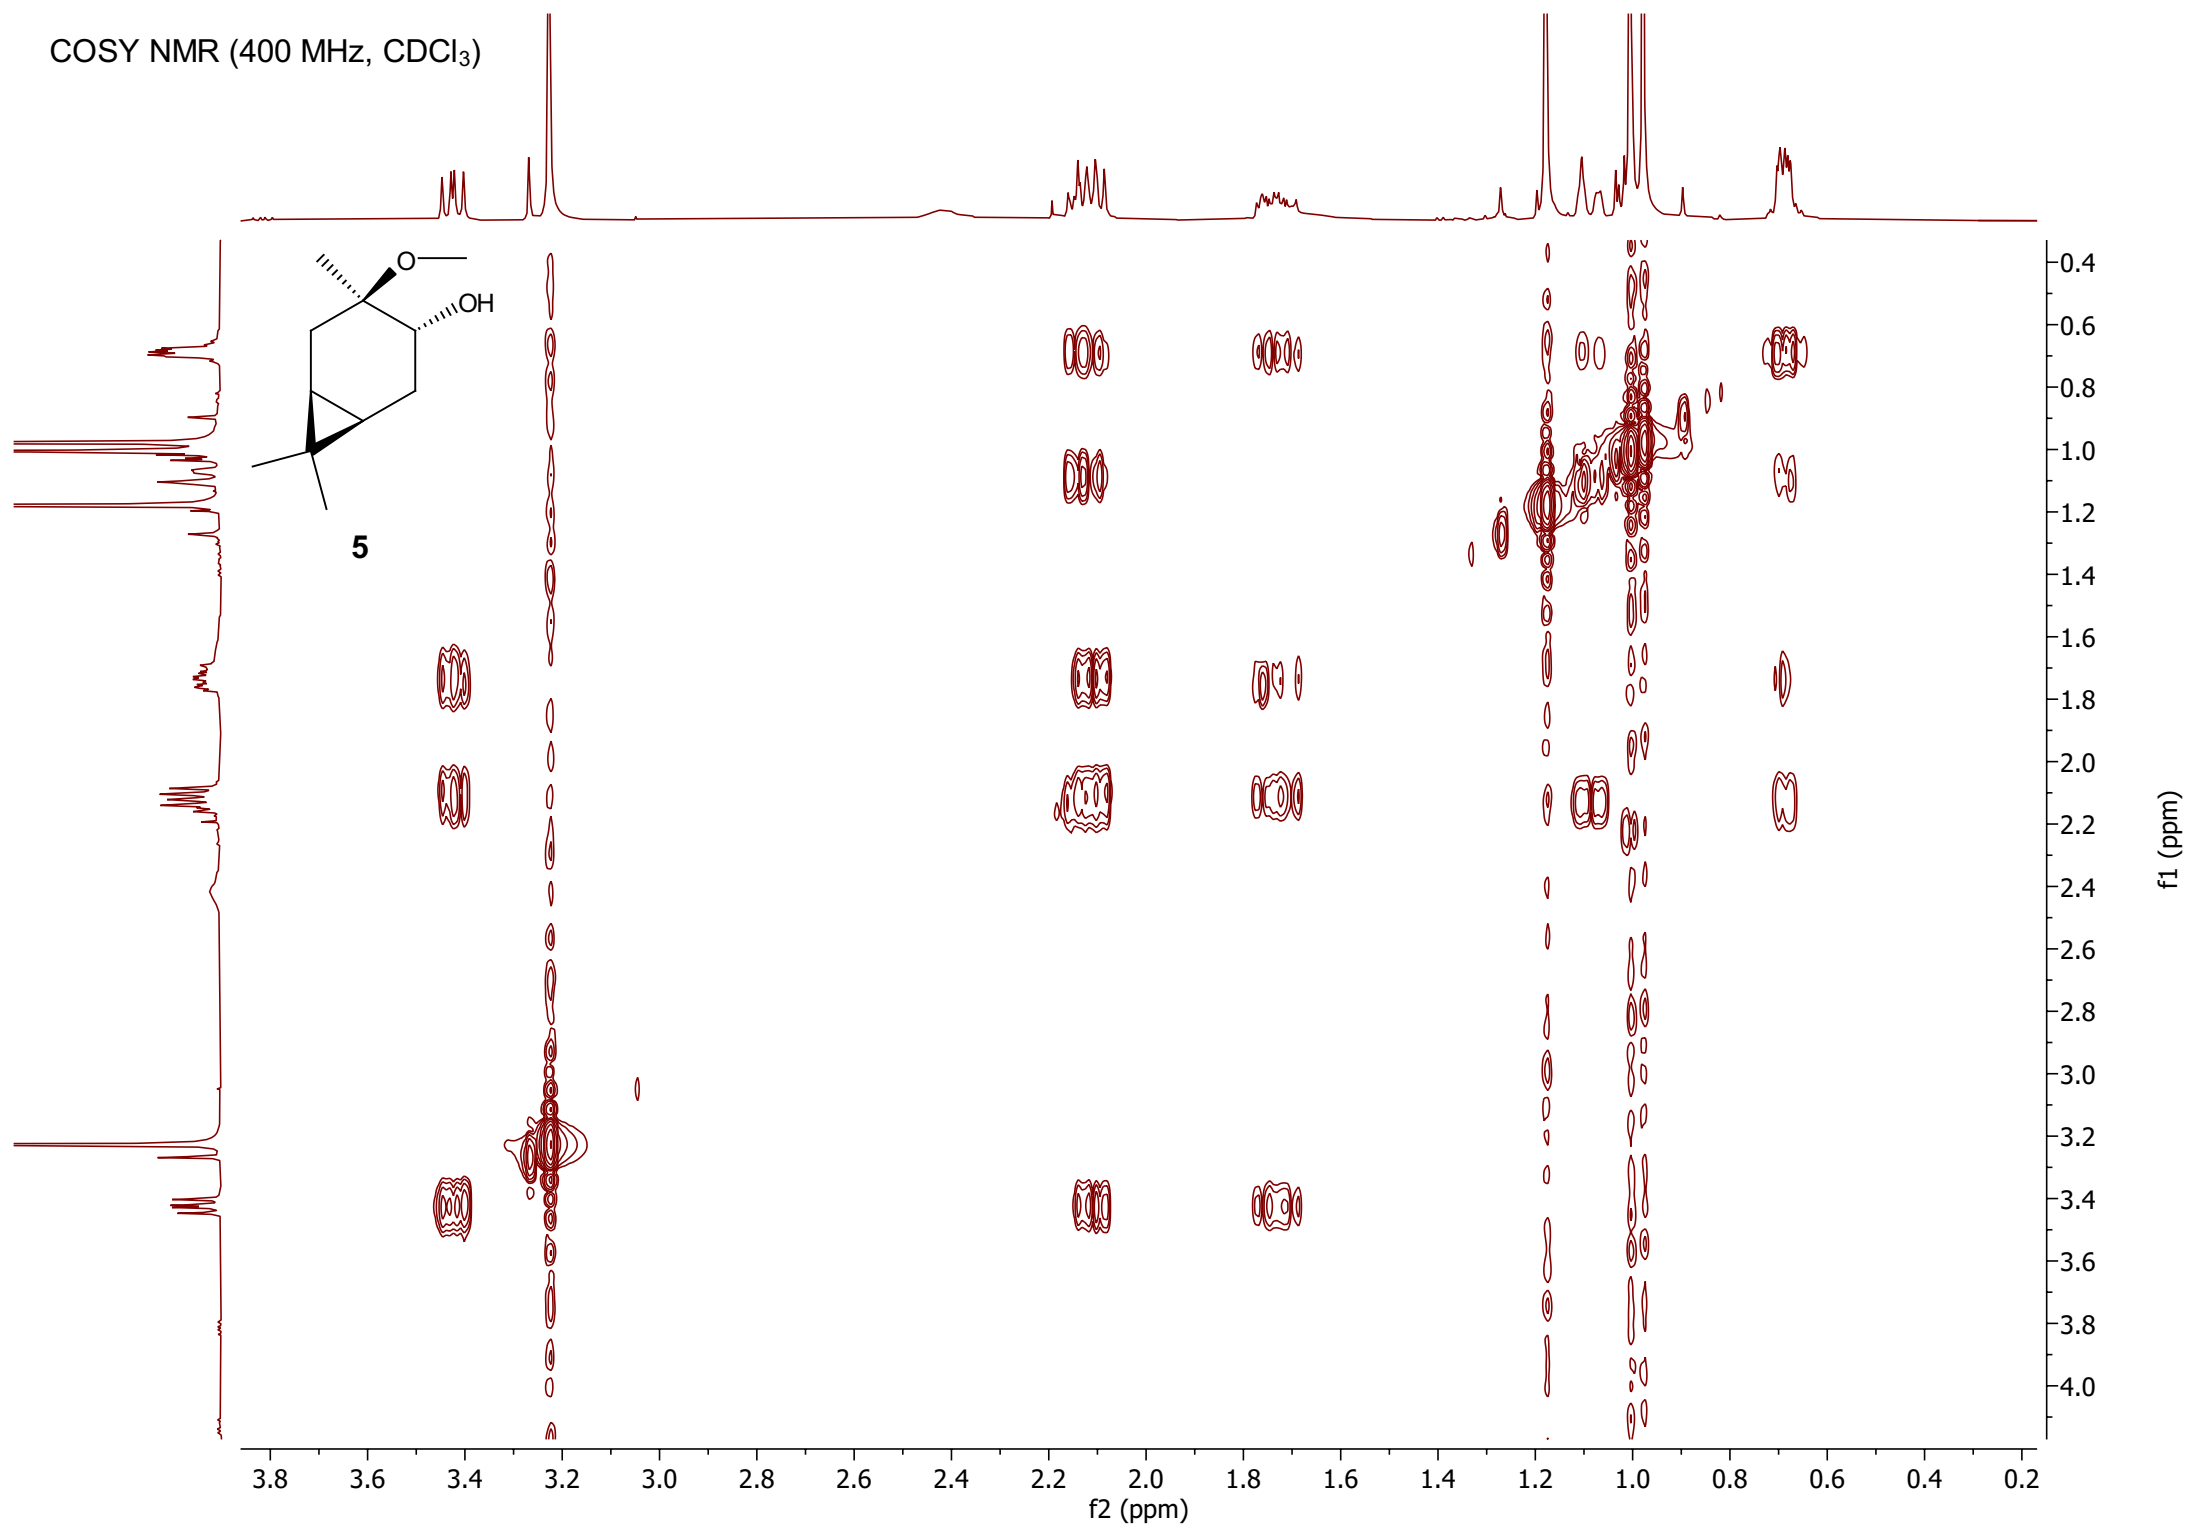

NOE NMR (400 MHz, CDCl<sub>3</sub>)

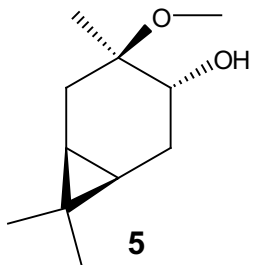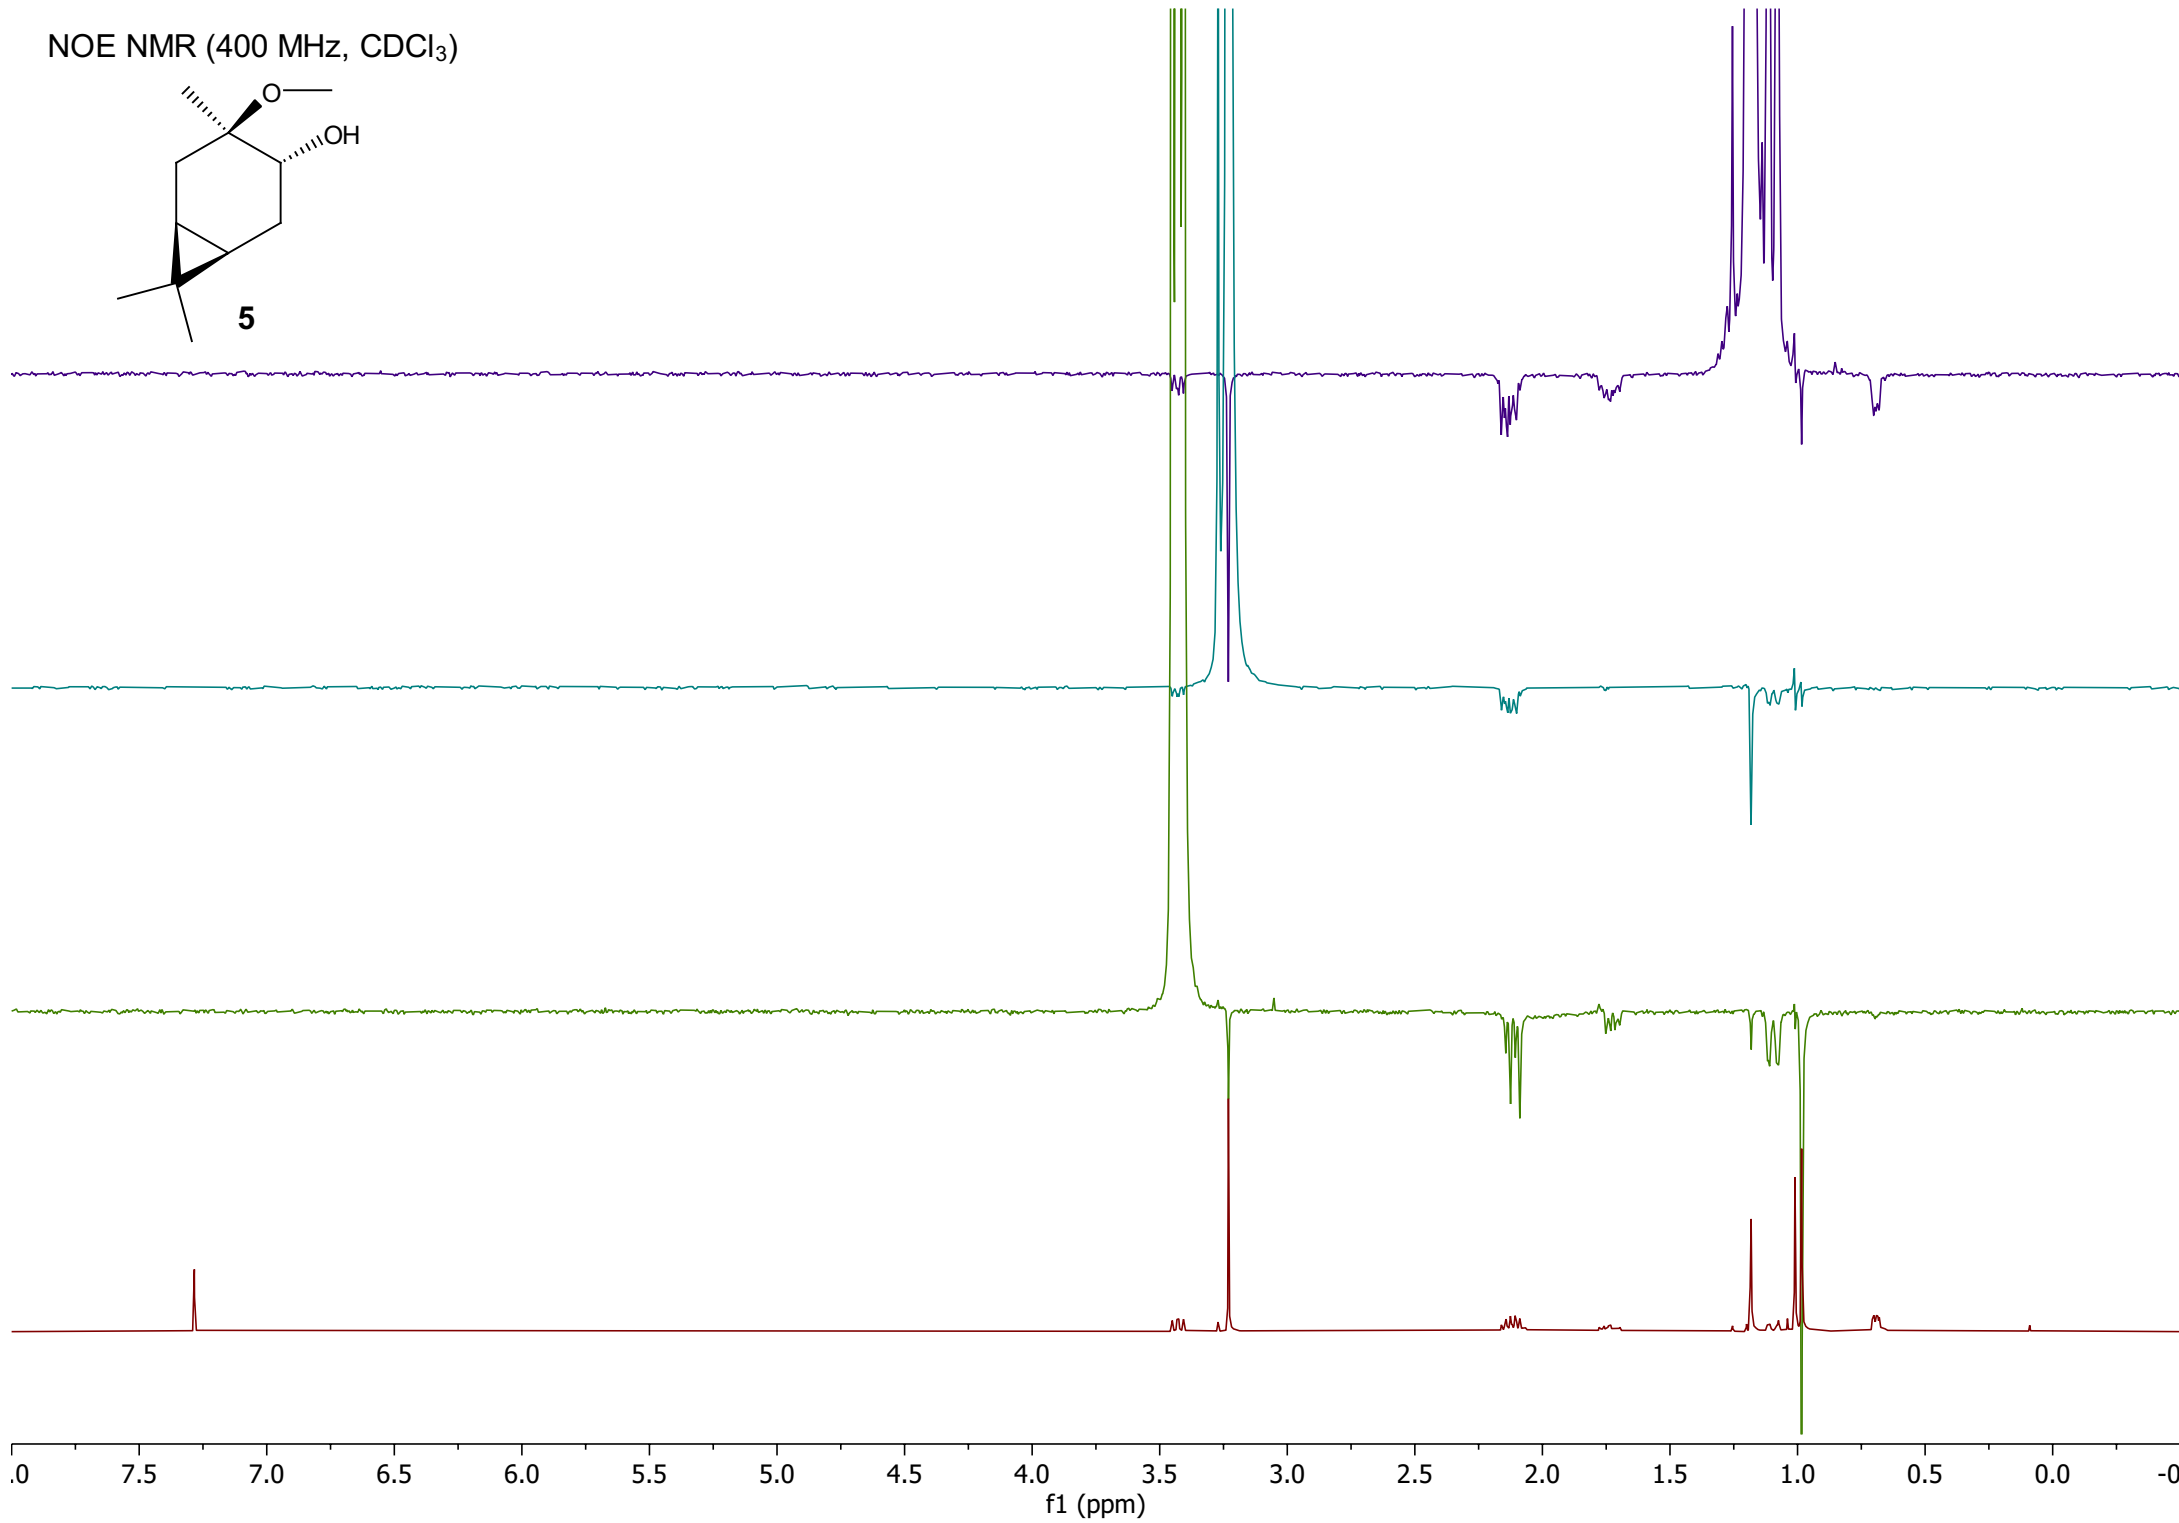



Mon Aug 02 15:48:13 2021 (GMT-07:00)

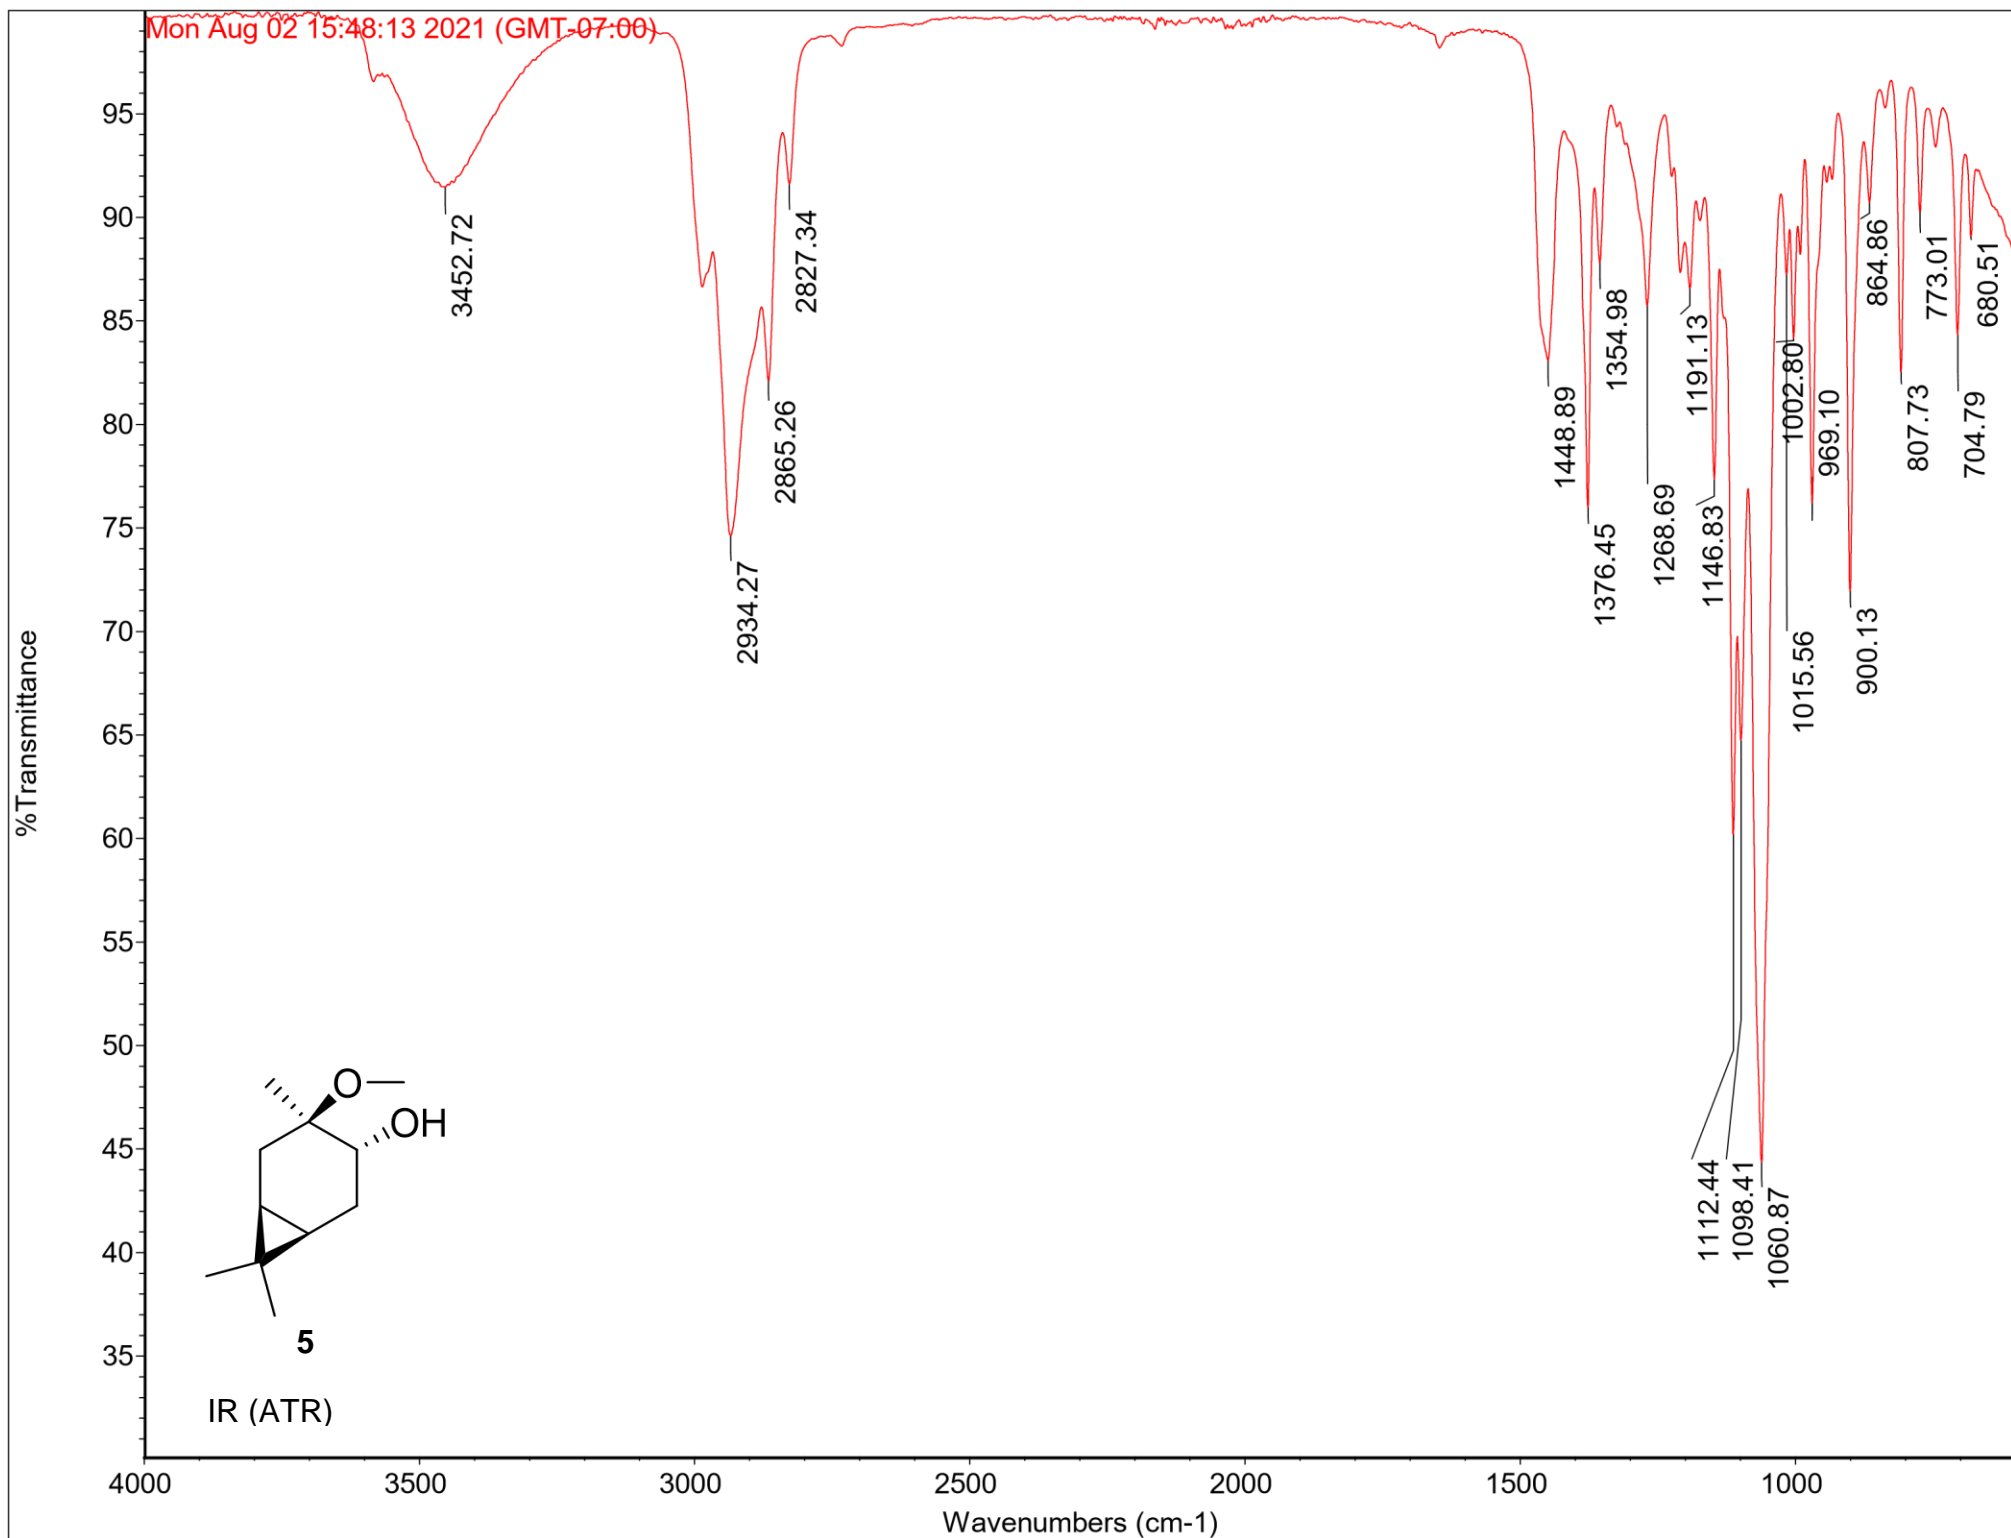

$^1\text{H}$  NMR (400 MHz,  $\text{C}_6\text{D}_6$ )

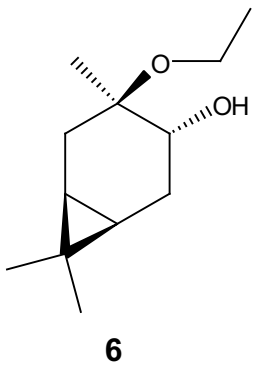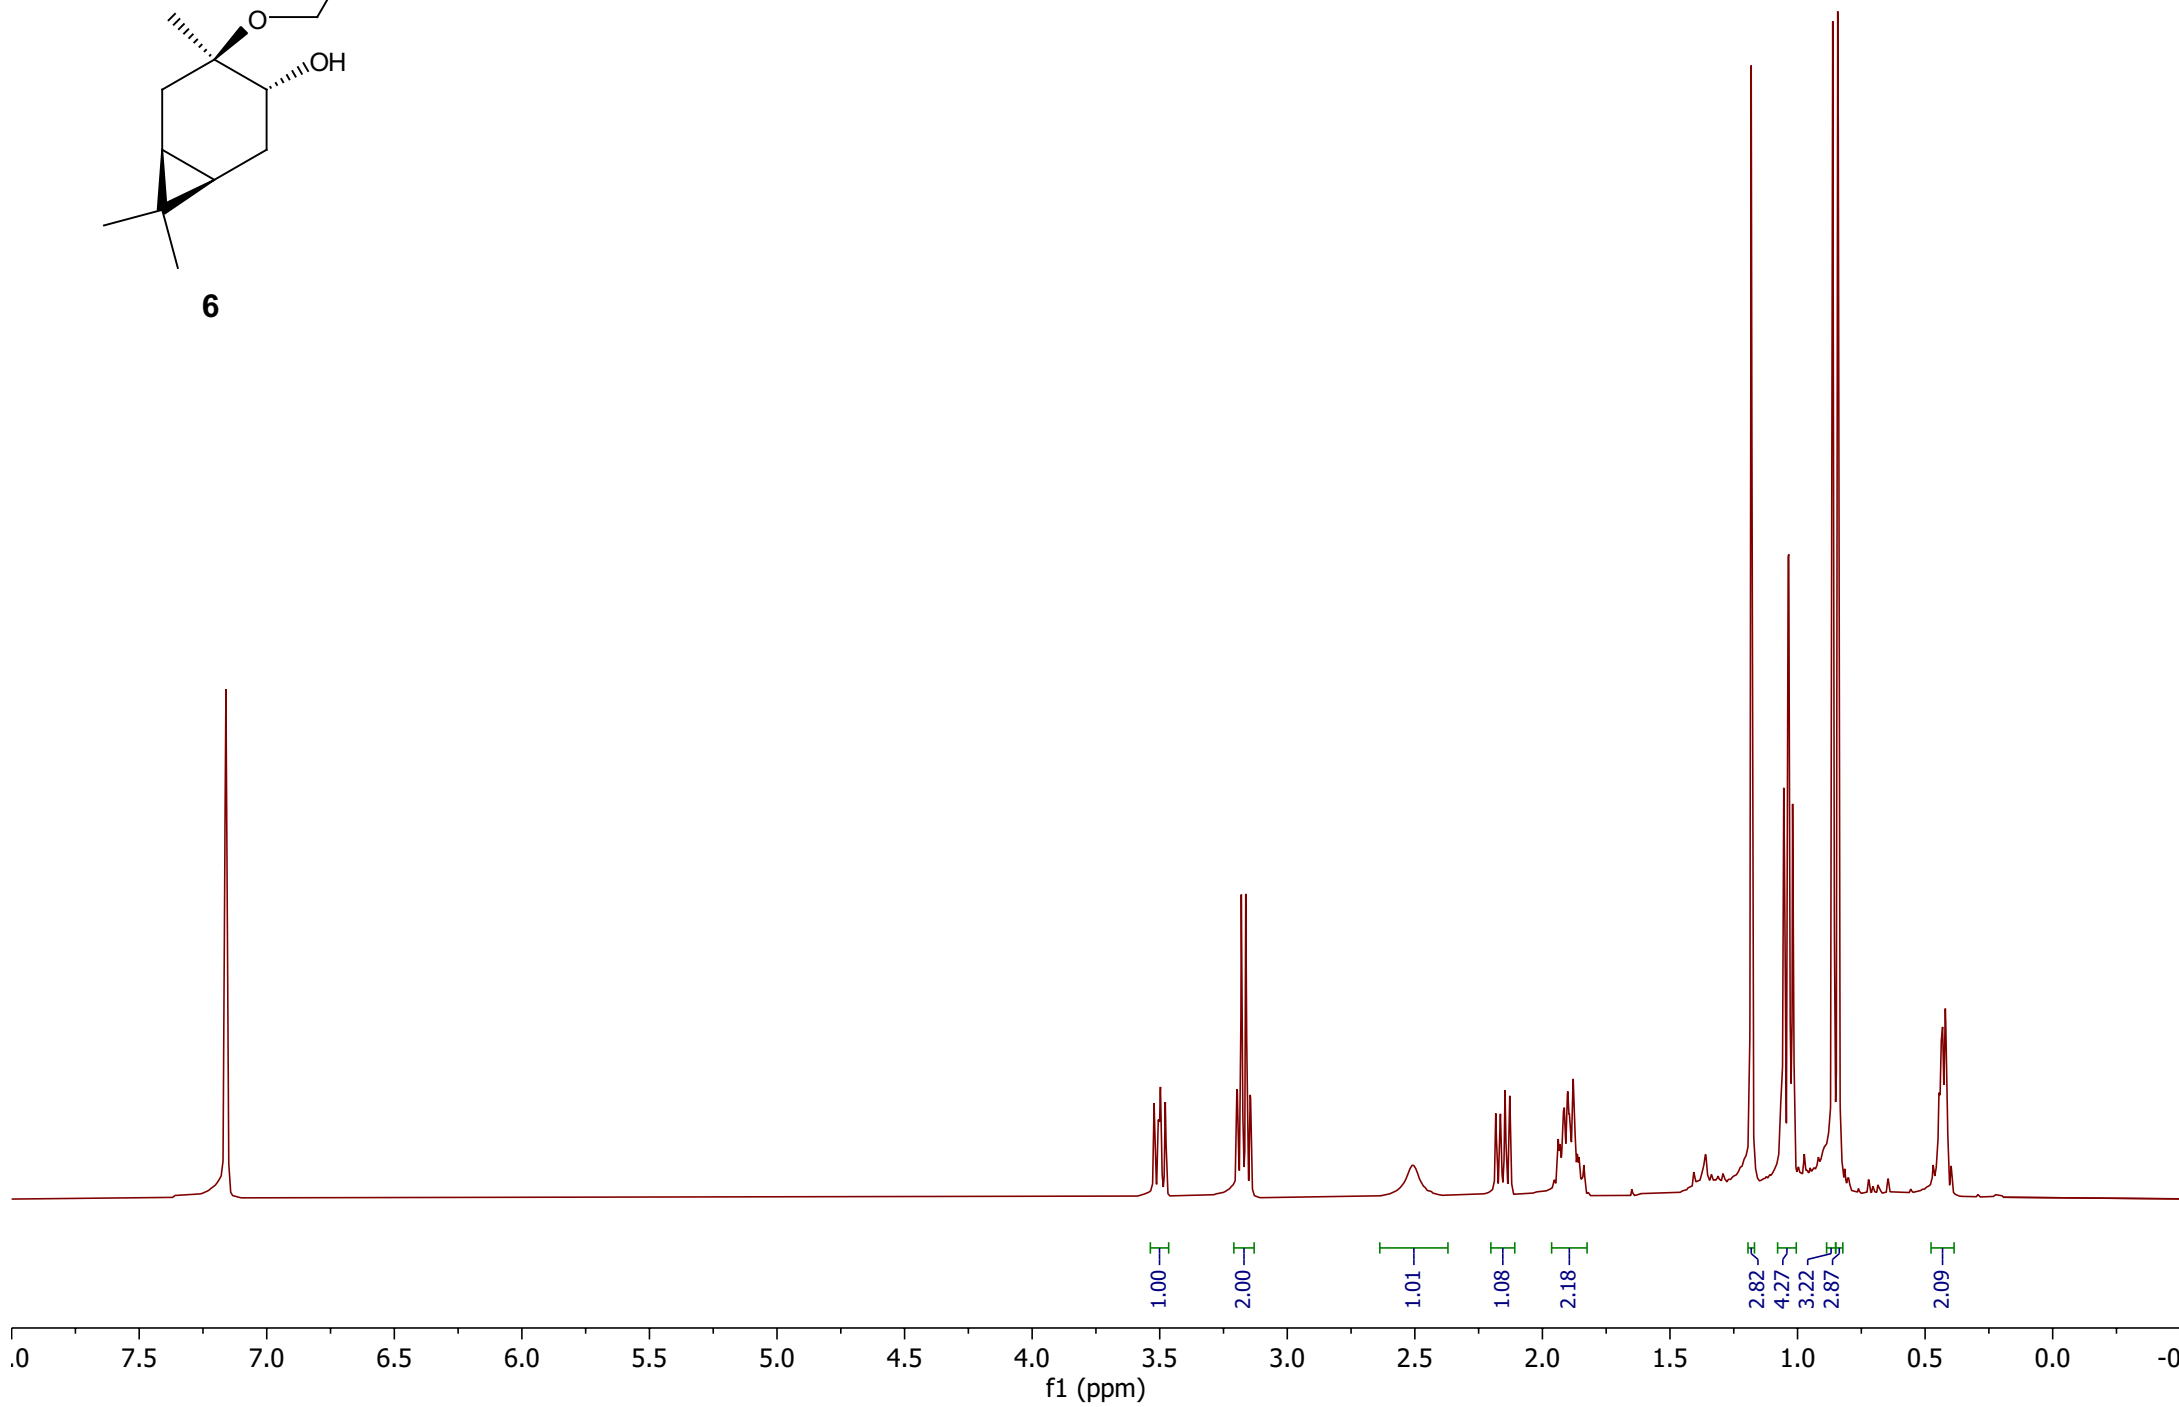

$^{13}\text{C}$   $\{^1\text{H}\}$  NMR (101 MHz,  $\text{C}_6\text{D}_6$ )

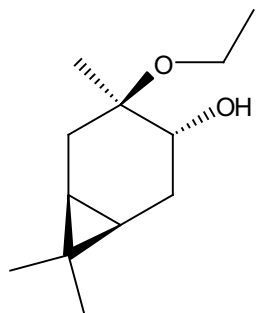

**6**

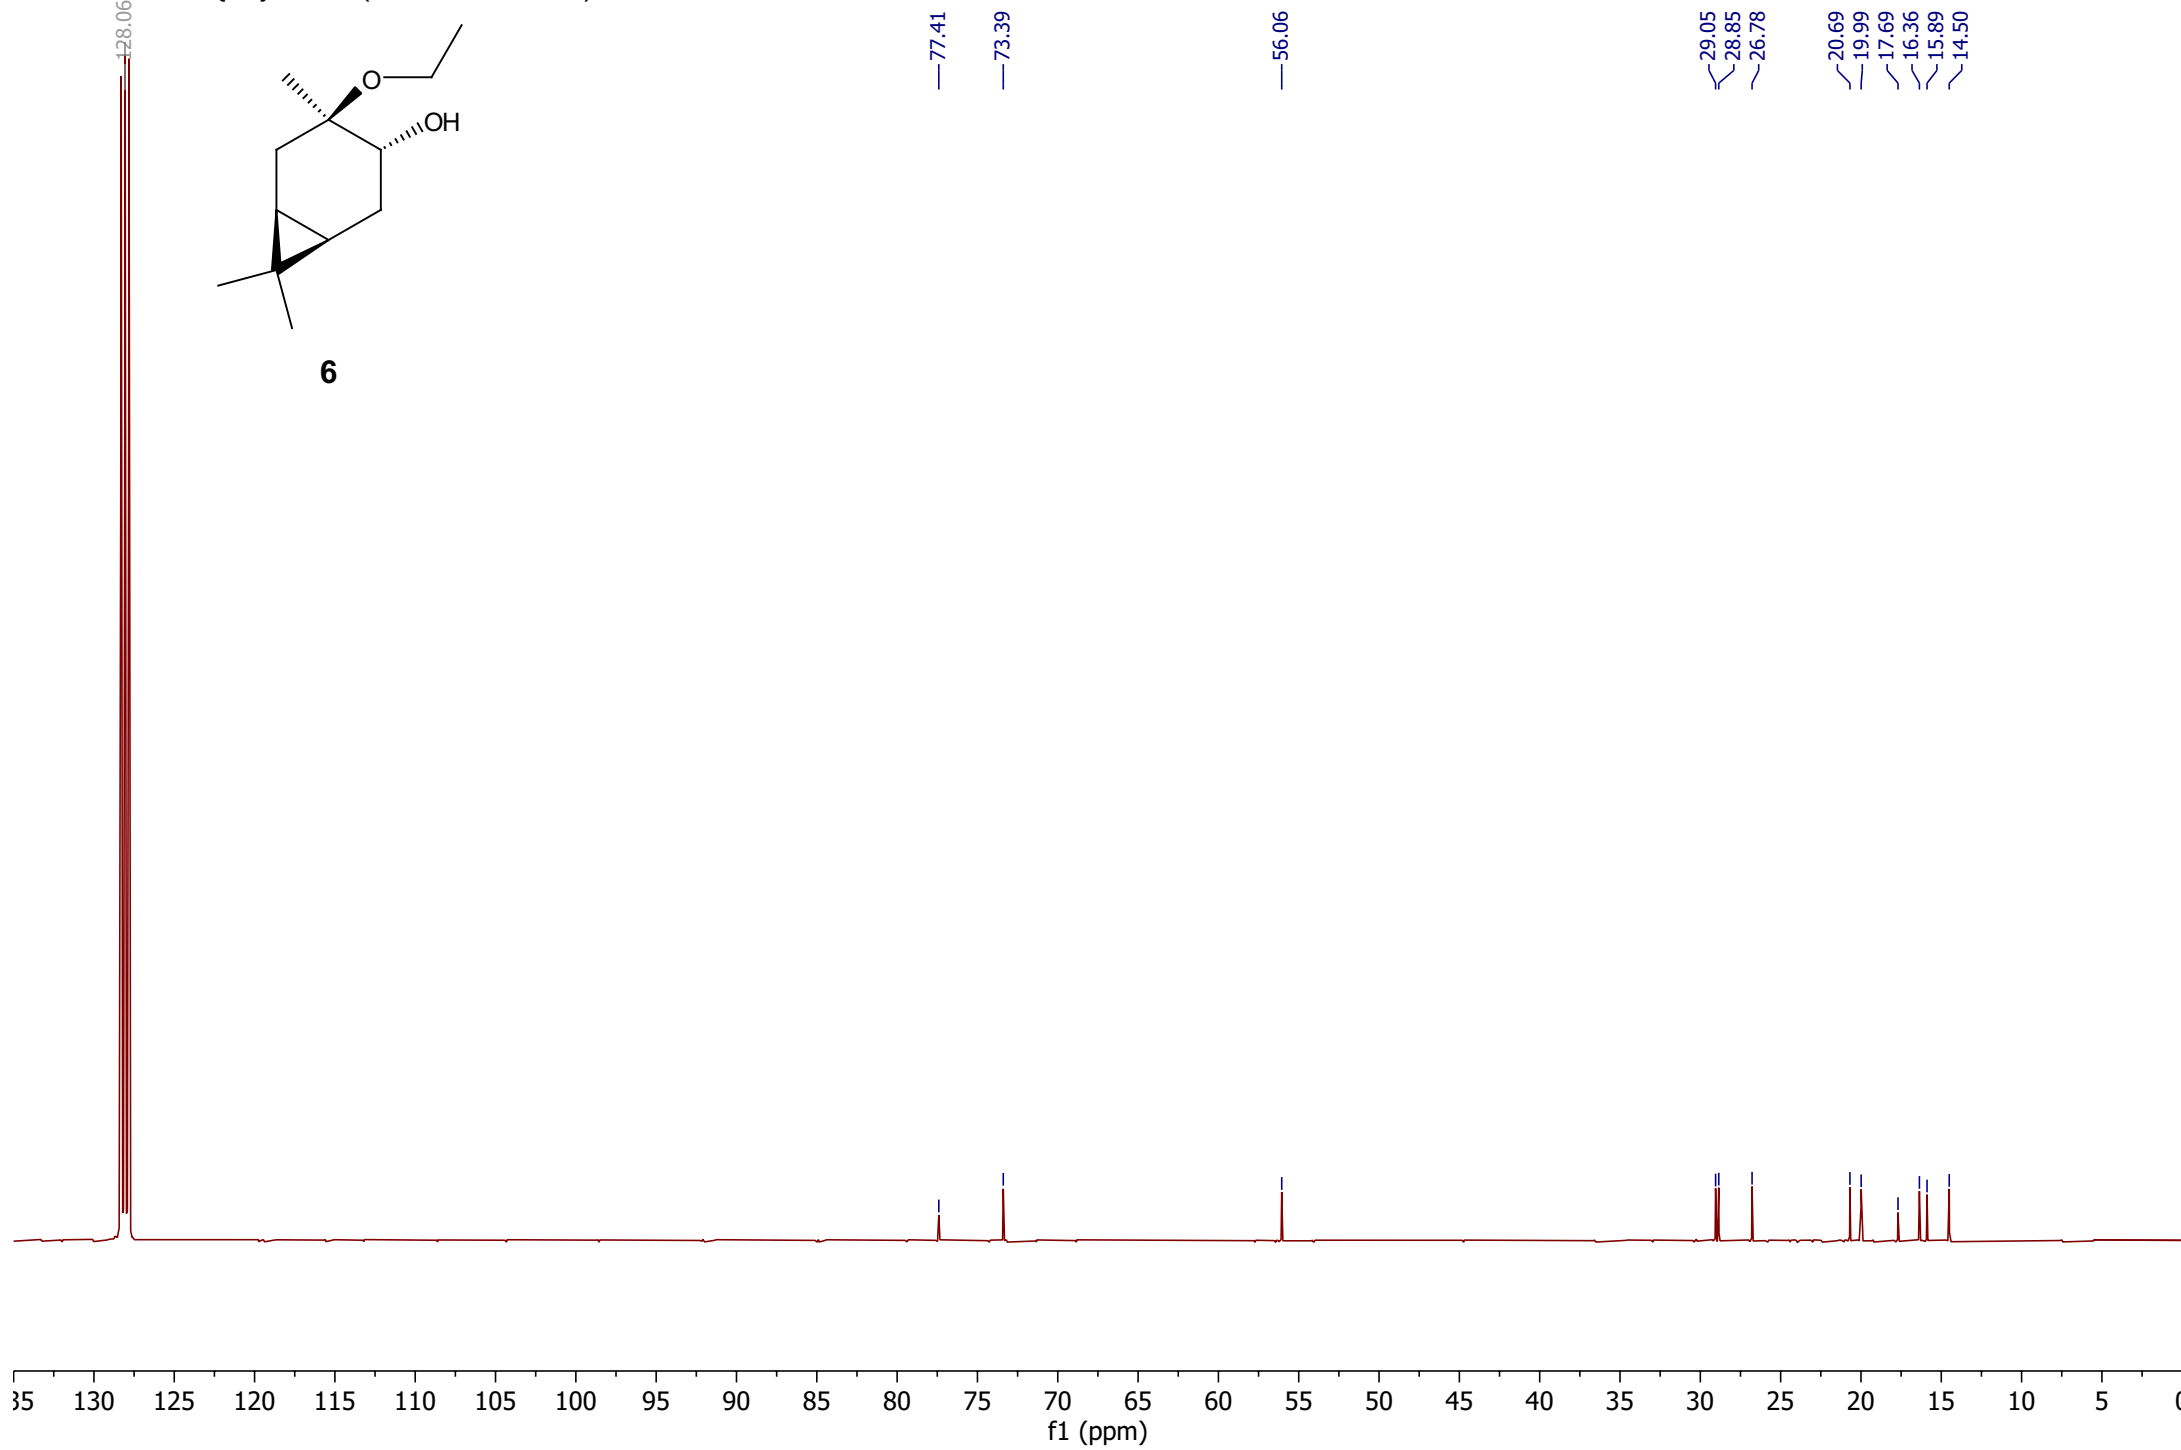

HSQC NMR ( $^1\text{H}$ - $^{13}\text{C}$ ,  $\text{C}_6\text{D}_6$ )

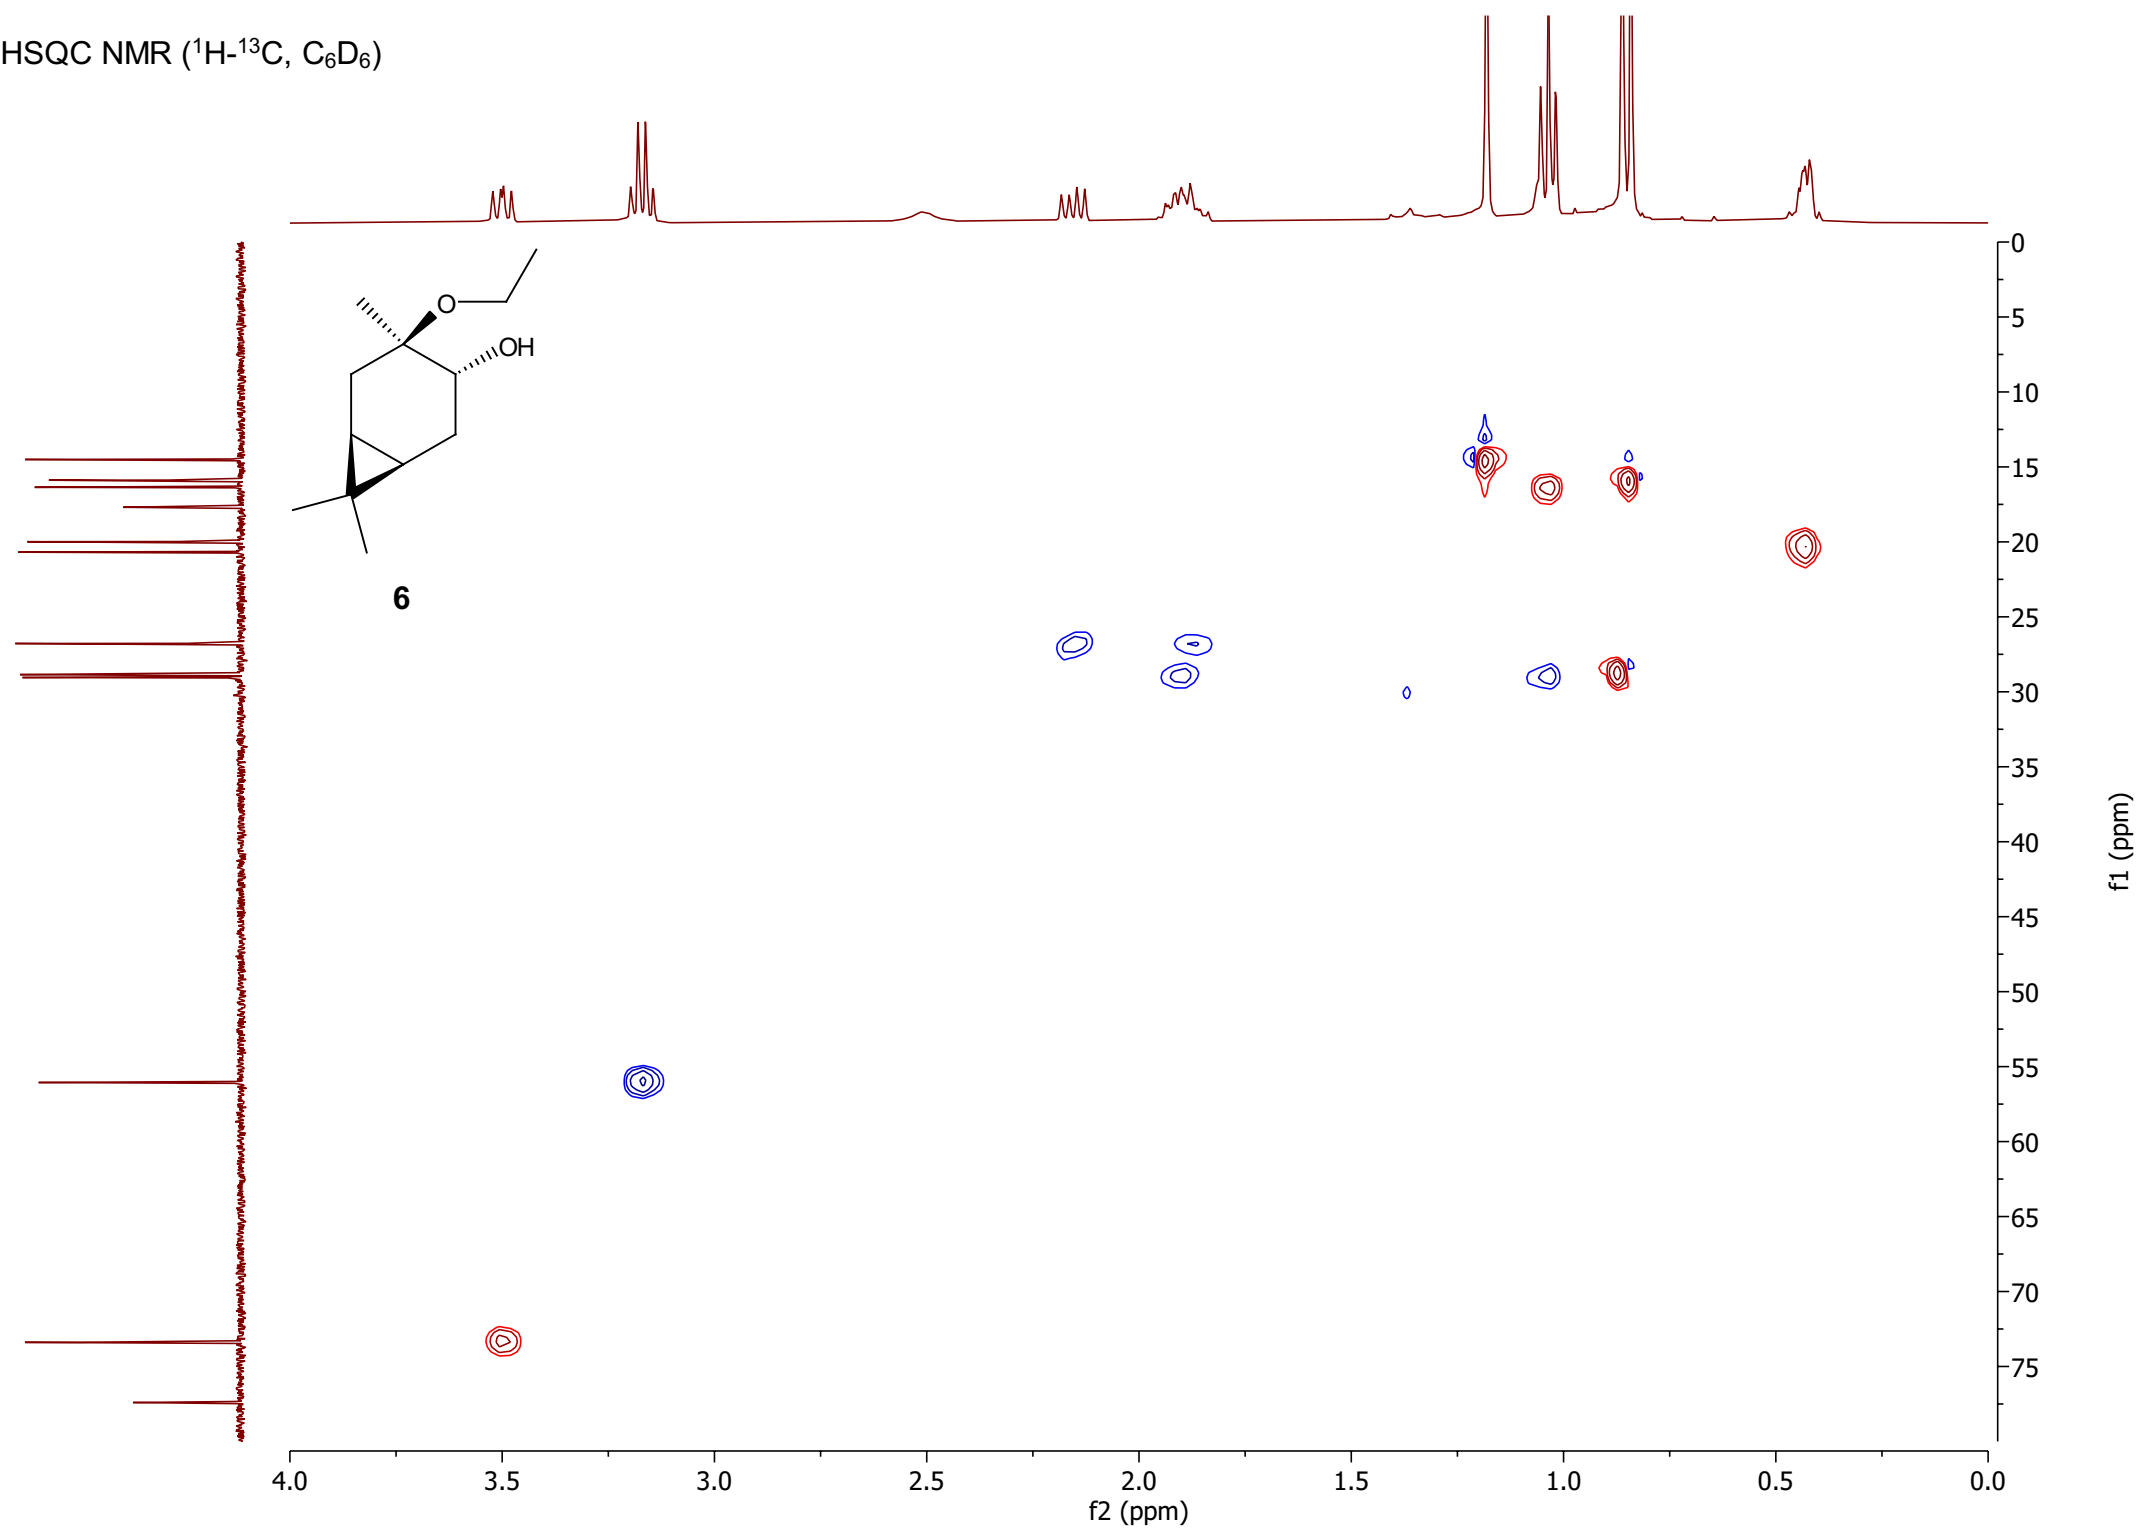

COSY NMR (400 MHz, C<sub>6</sub>D<sub>6</sub>)

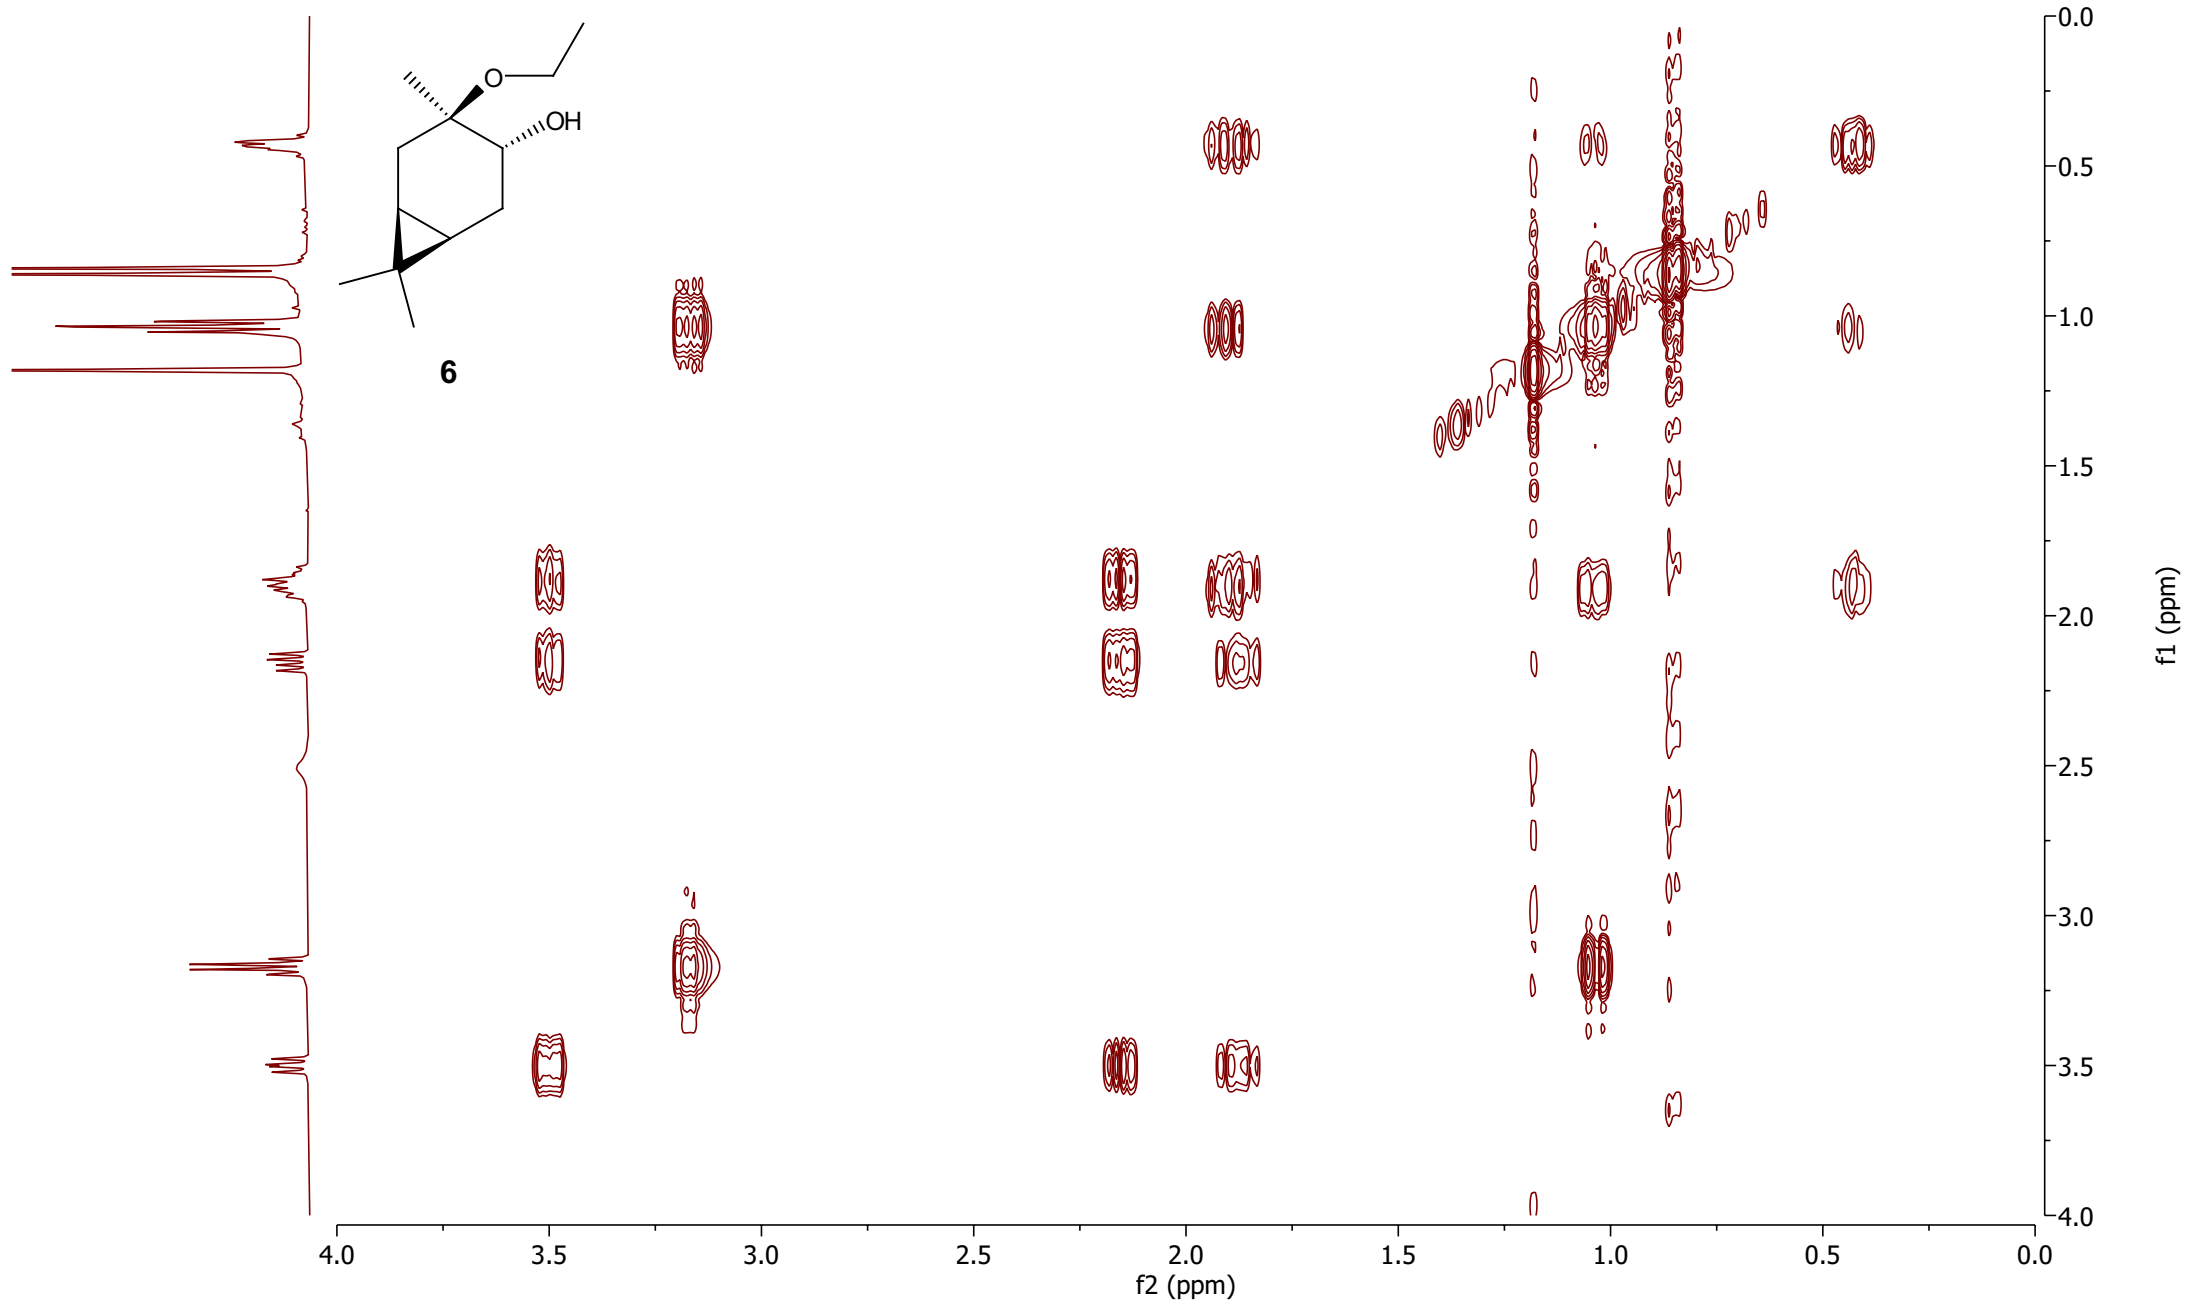

NOE NMR (400 MHz, C<sub>6</sub>D<sub>6</sub>)

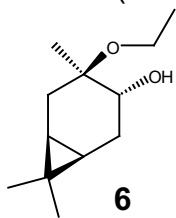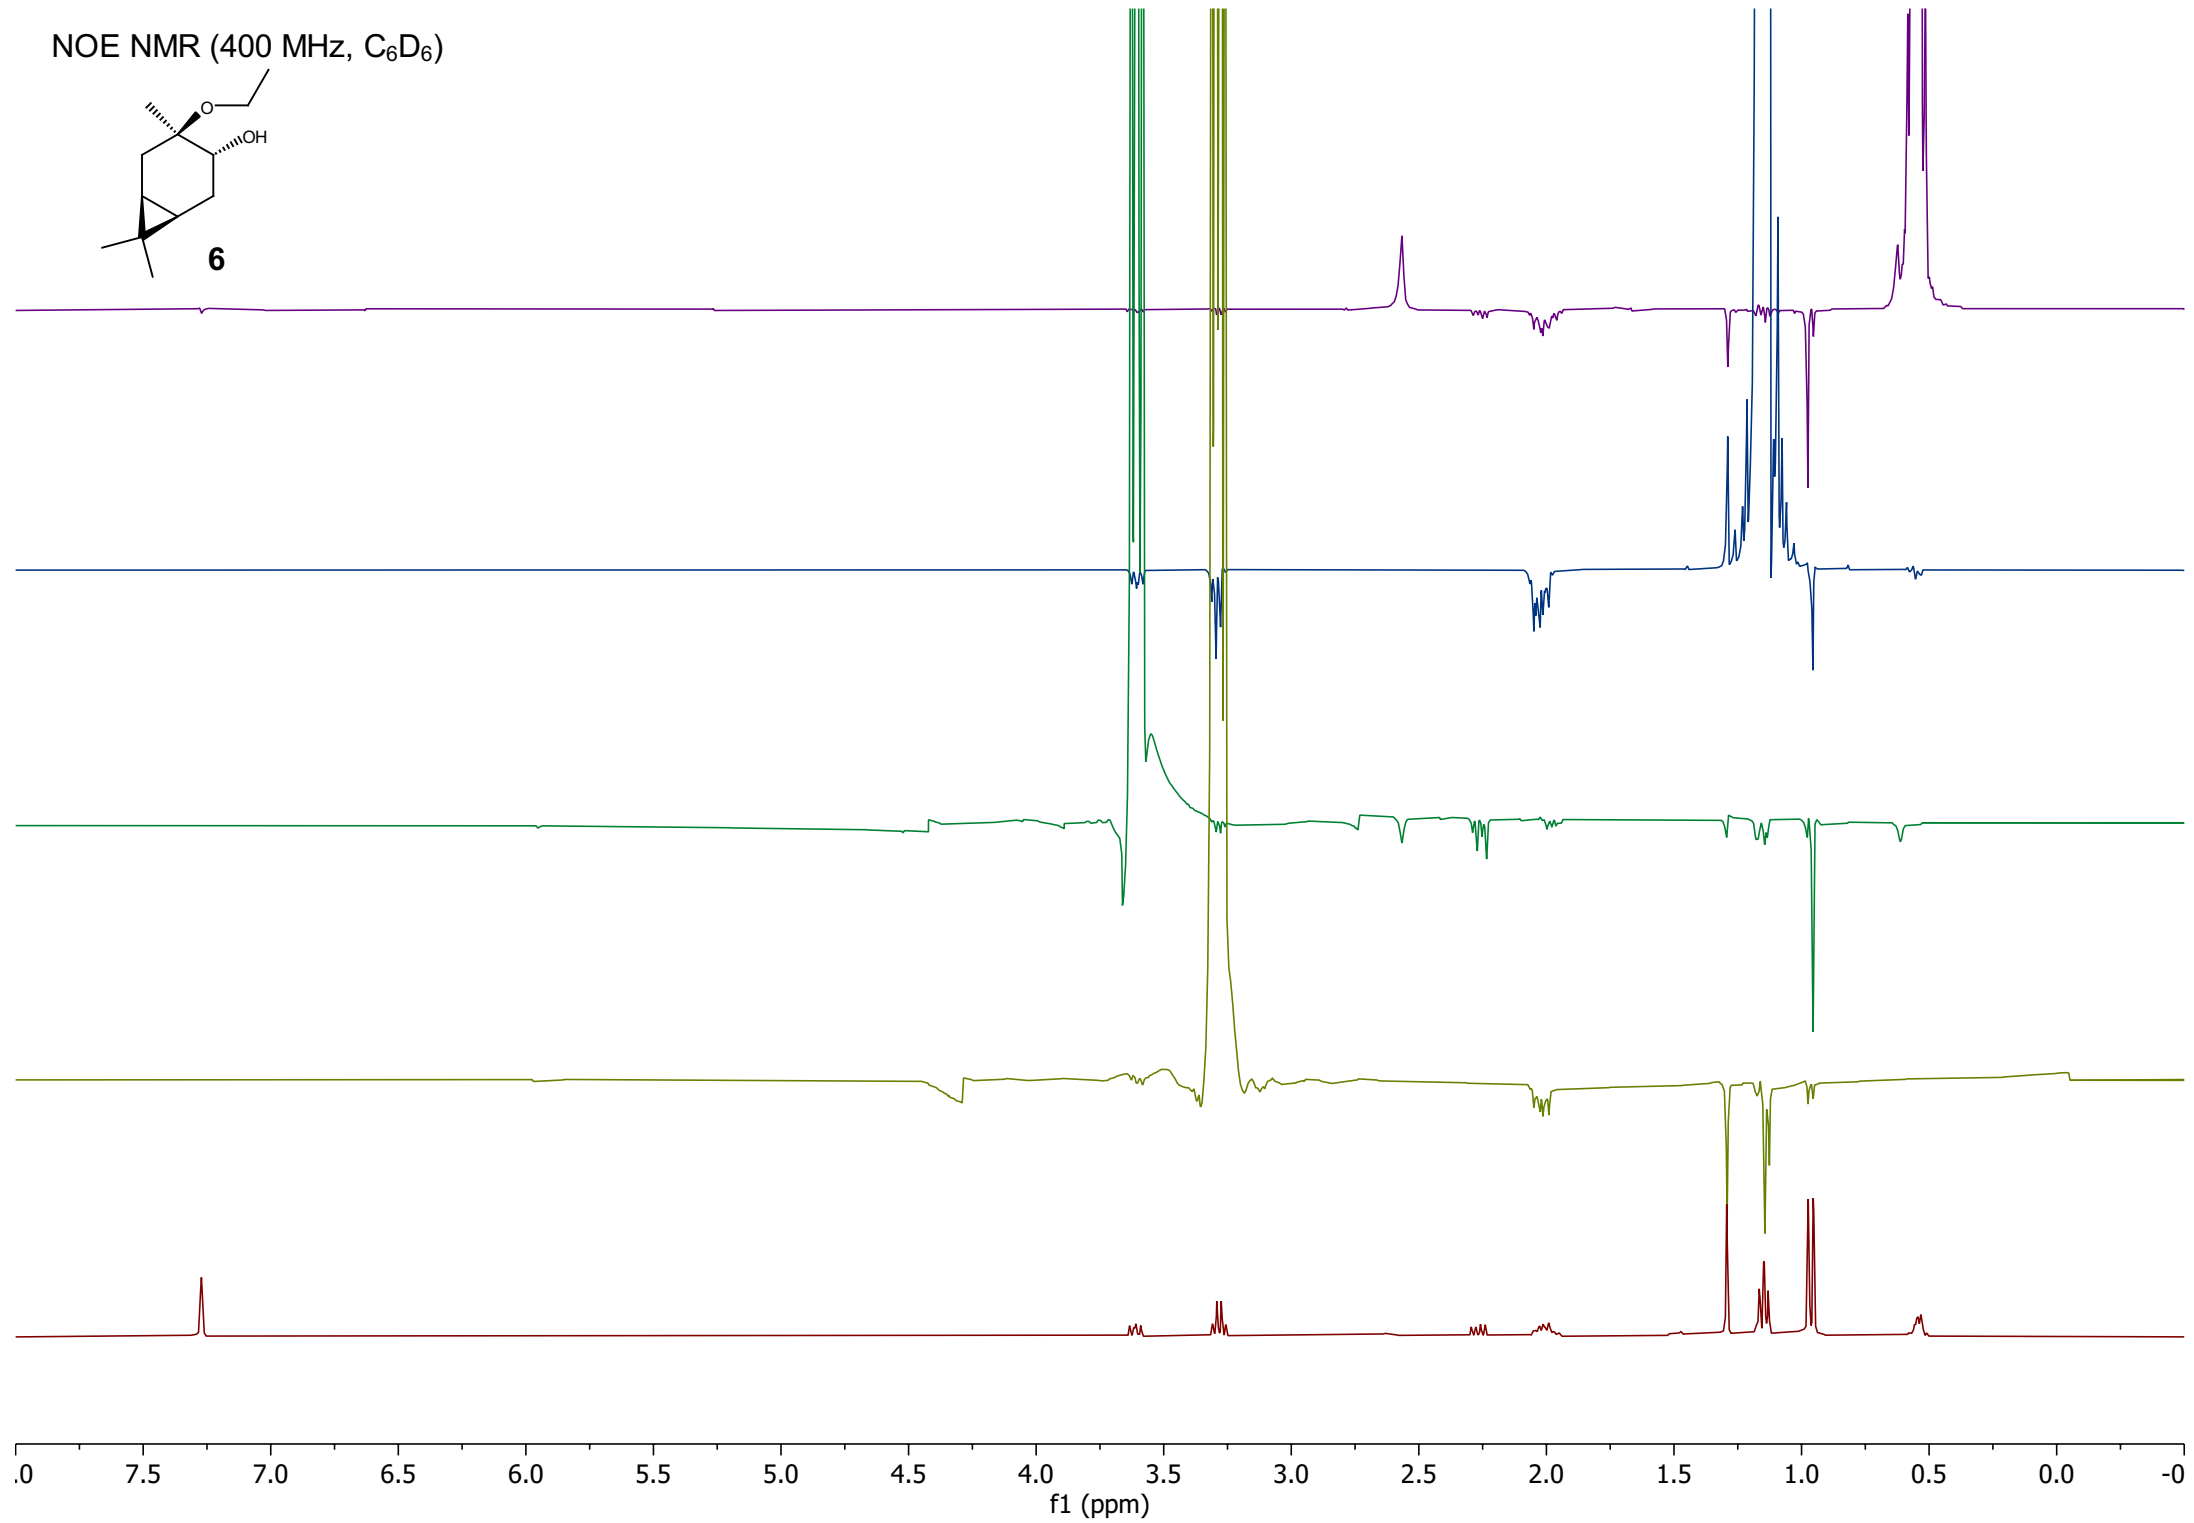

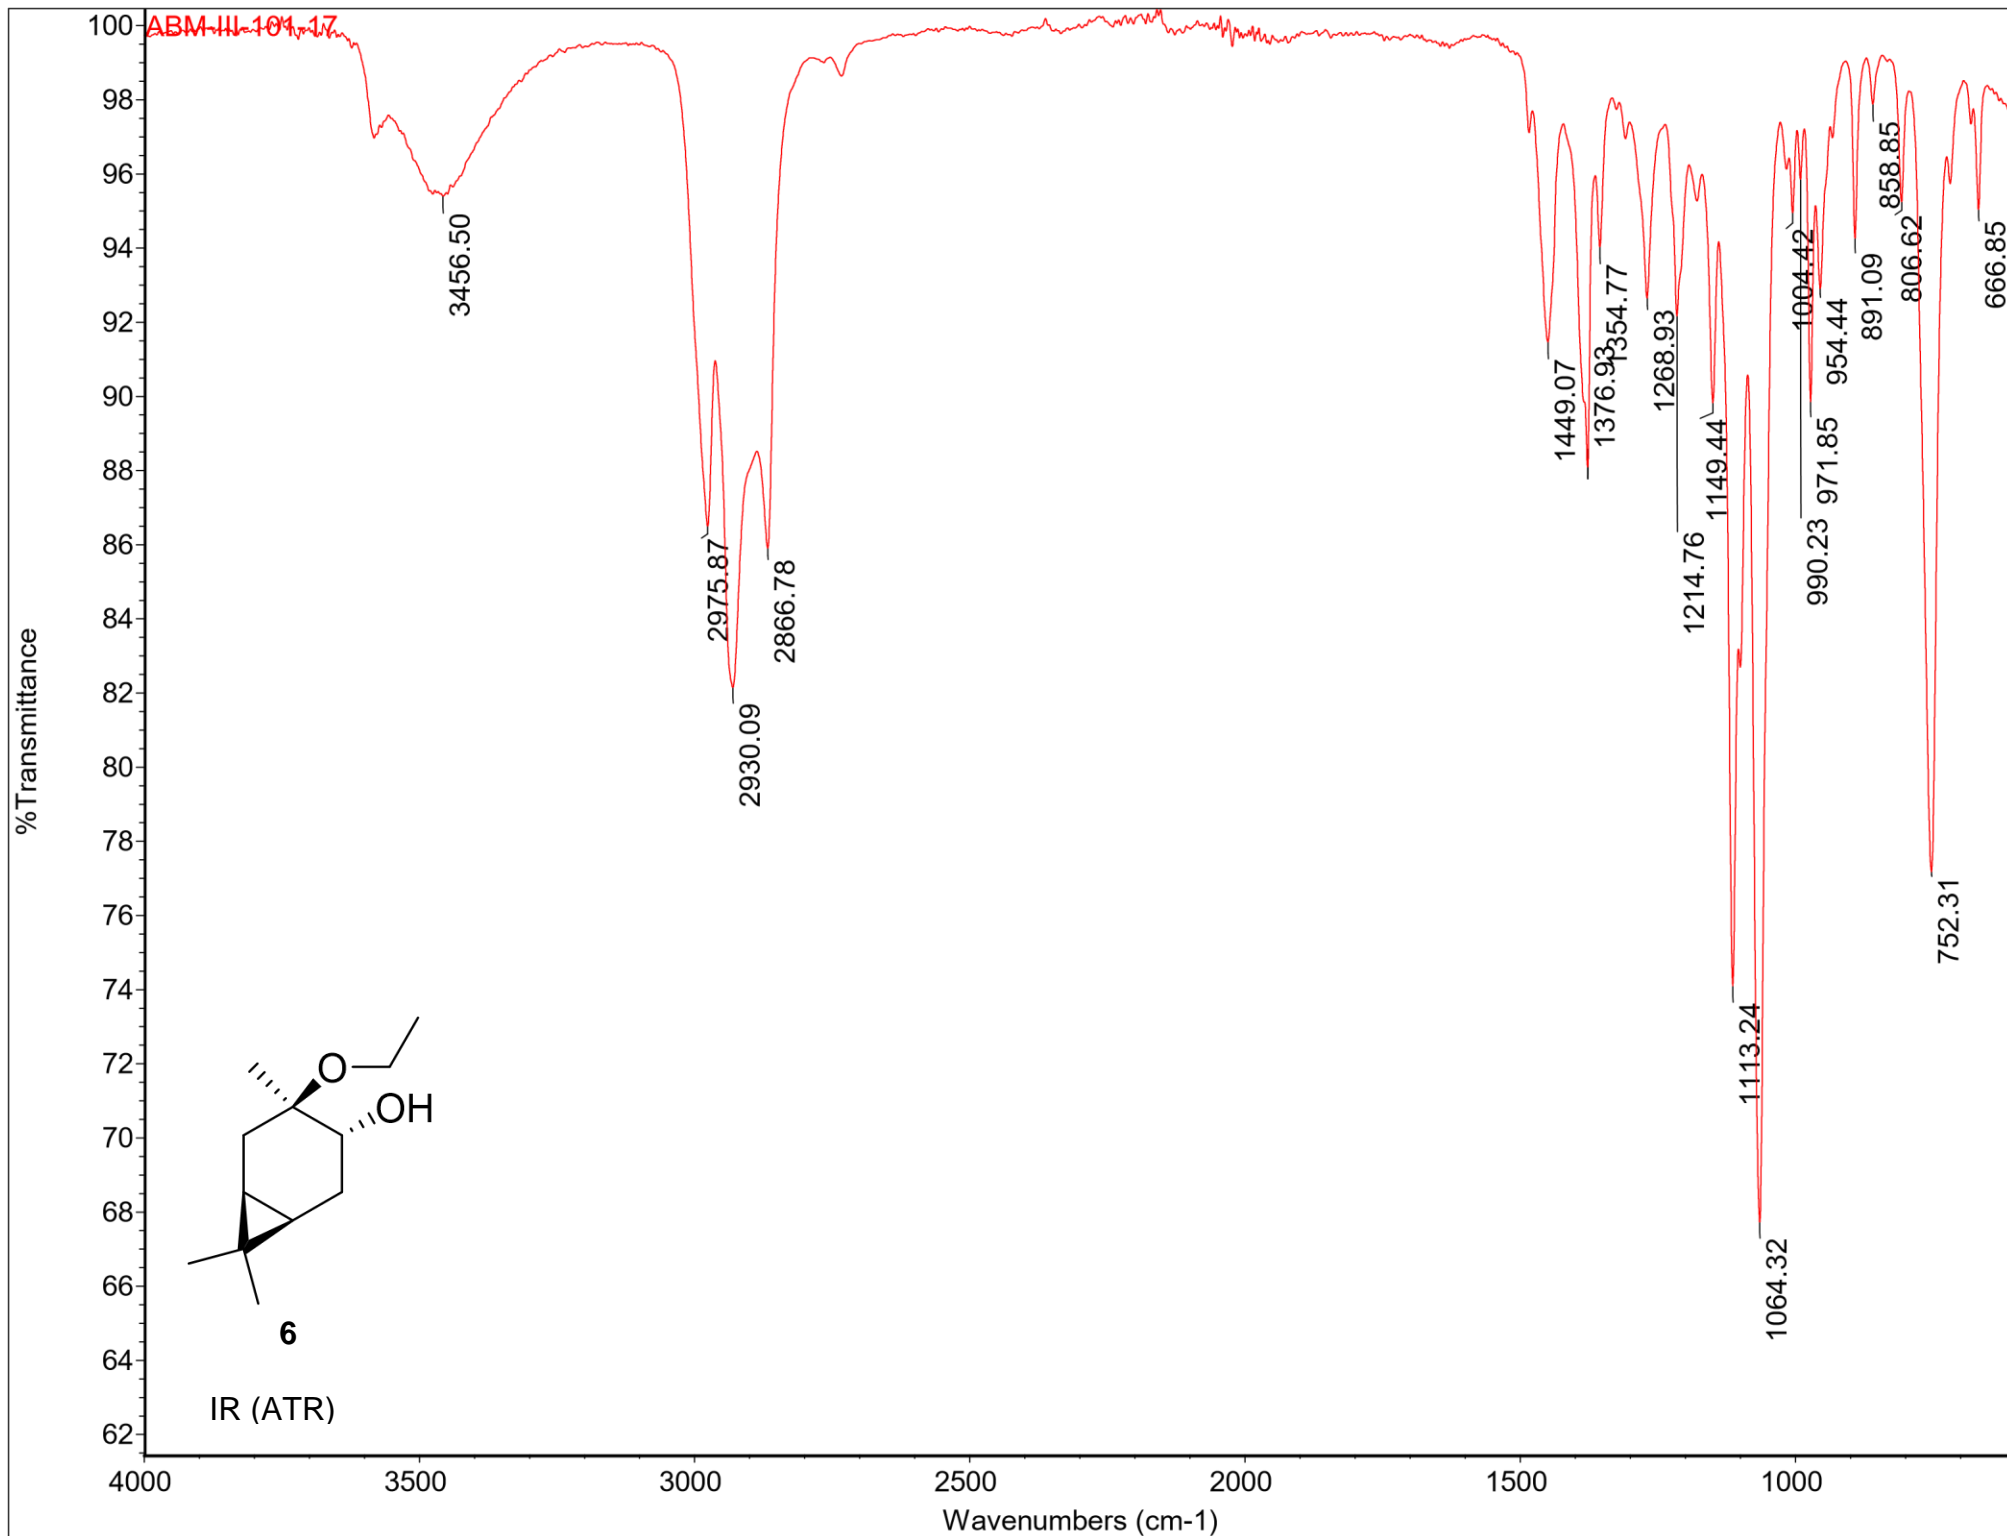

$^1\text{H}$  NMR (400 MHz,  $\text{CDCl}_3$ )

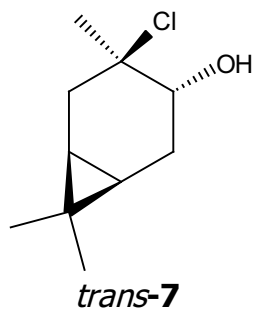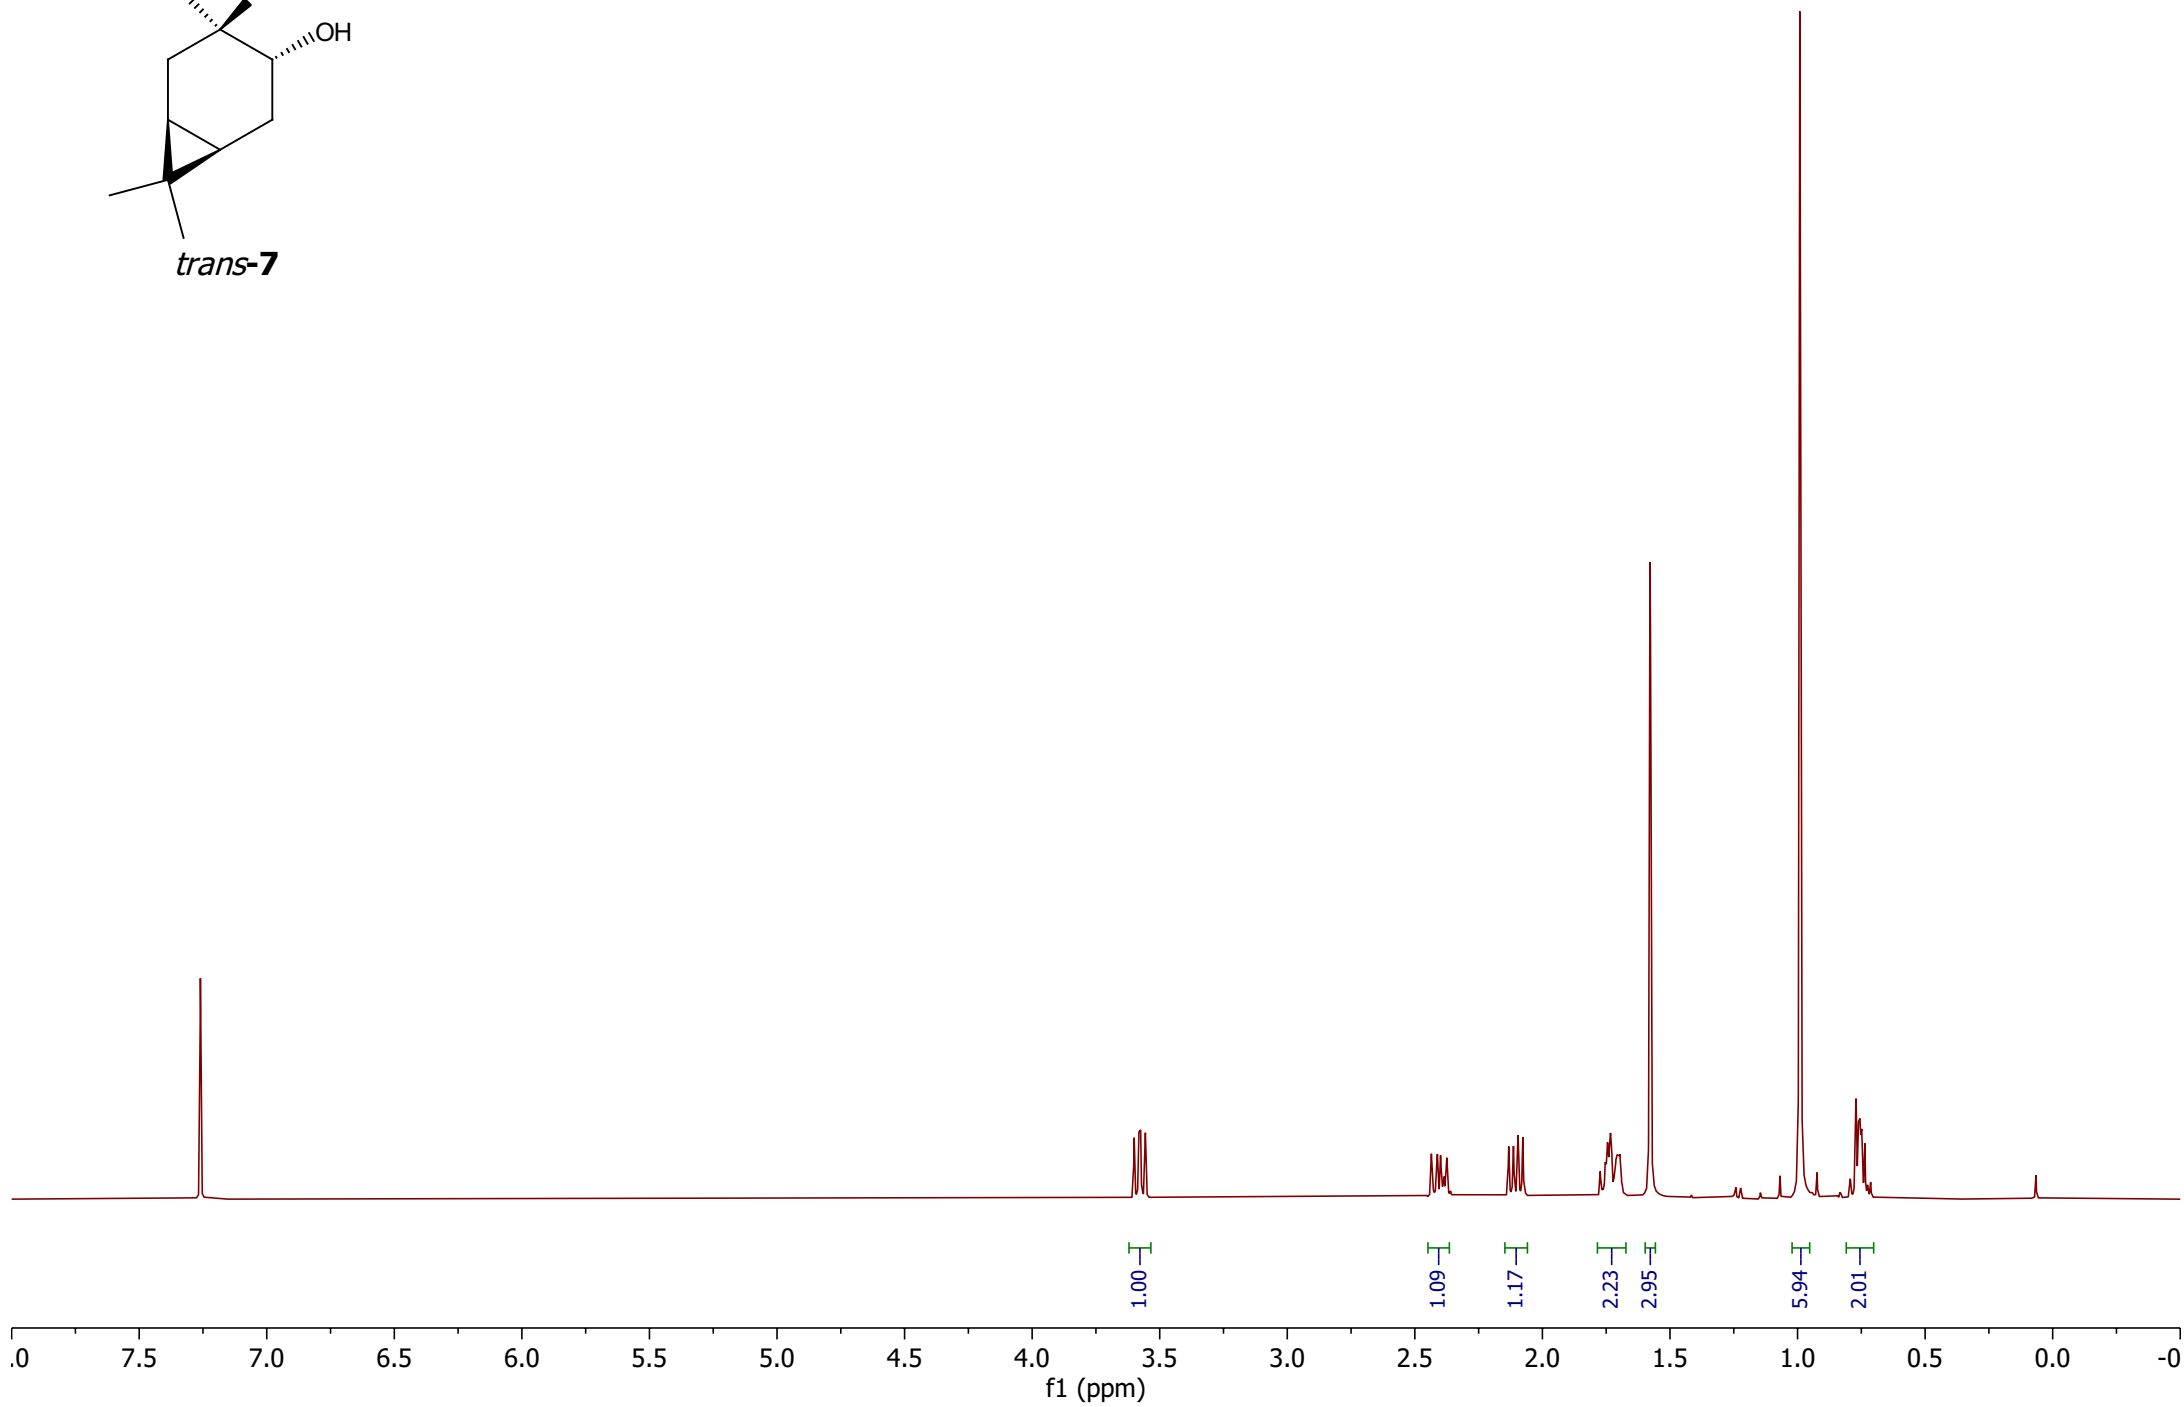



$^{13}\text{C}$   $\{^1\text{H}\}$  NMR (101 MHz,  $\text{CDCl}_3$ )

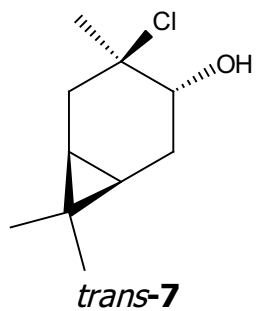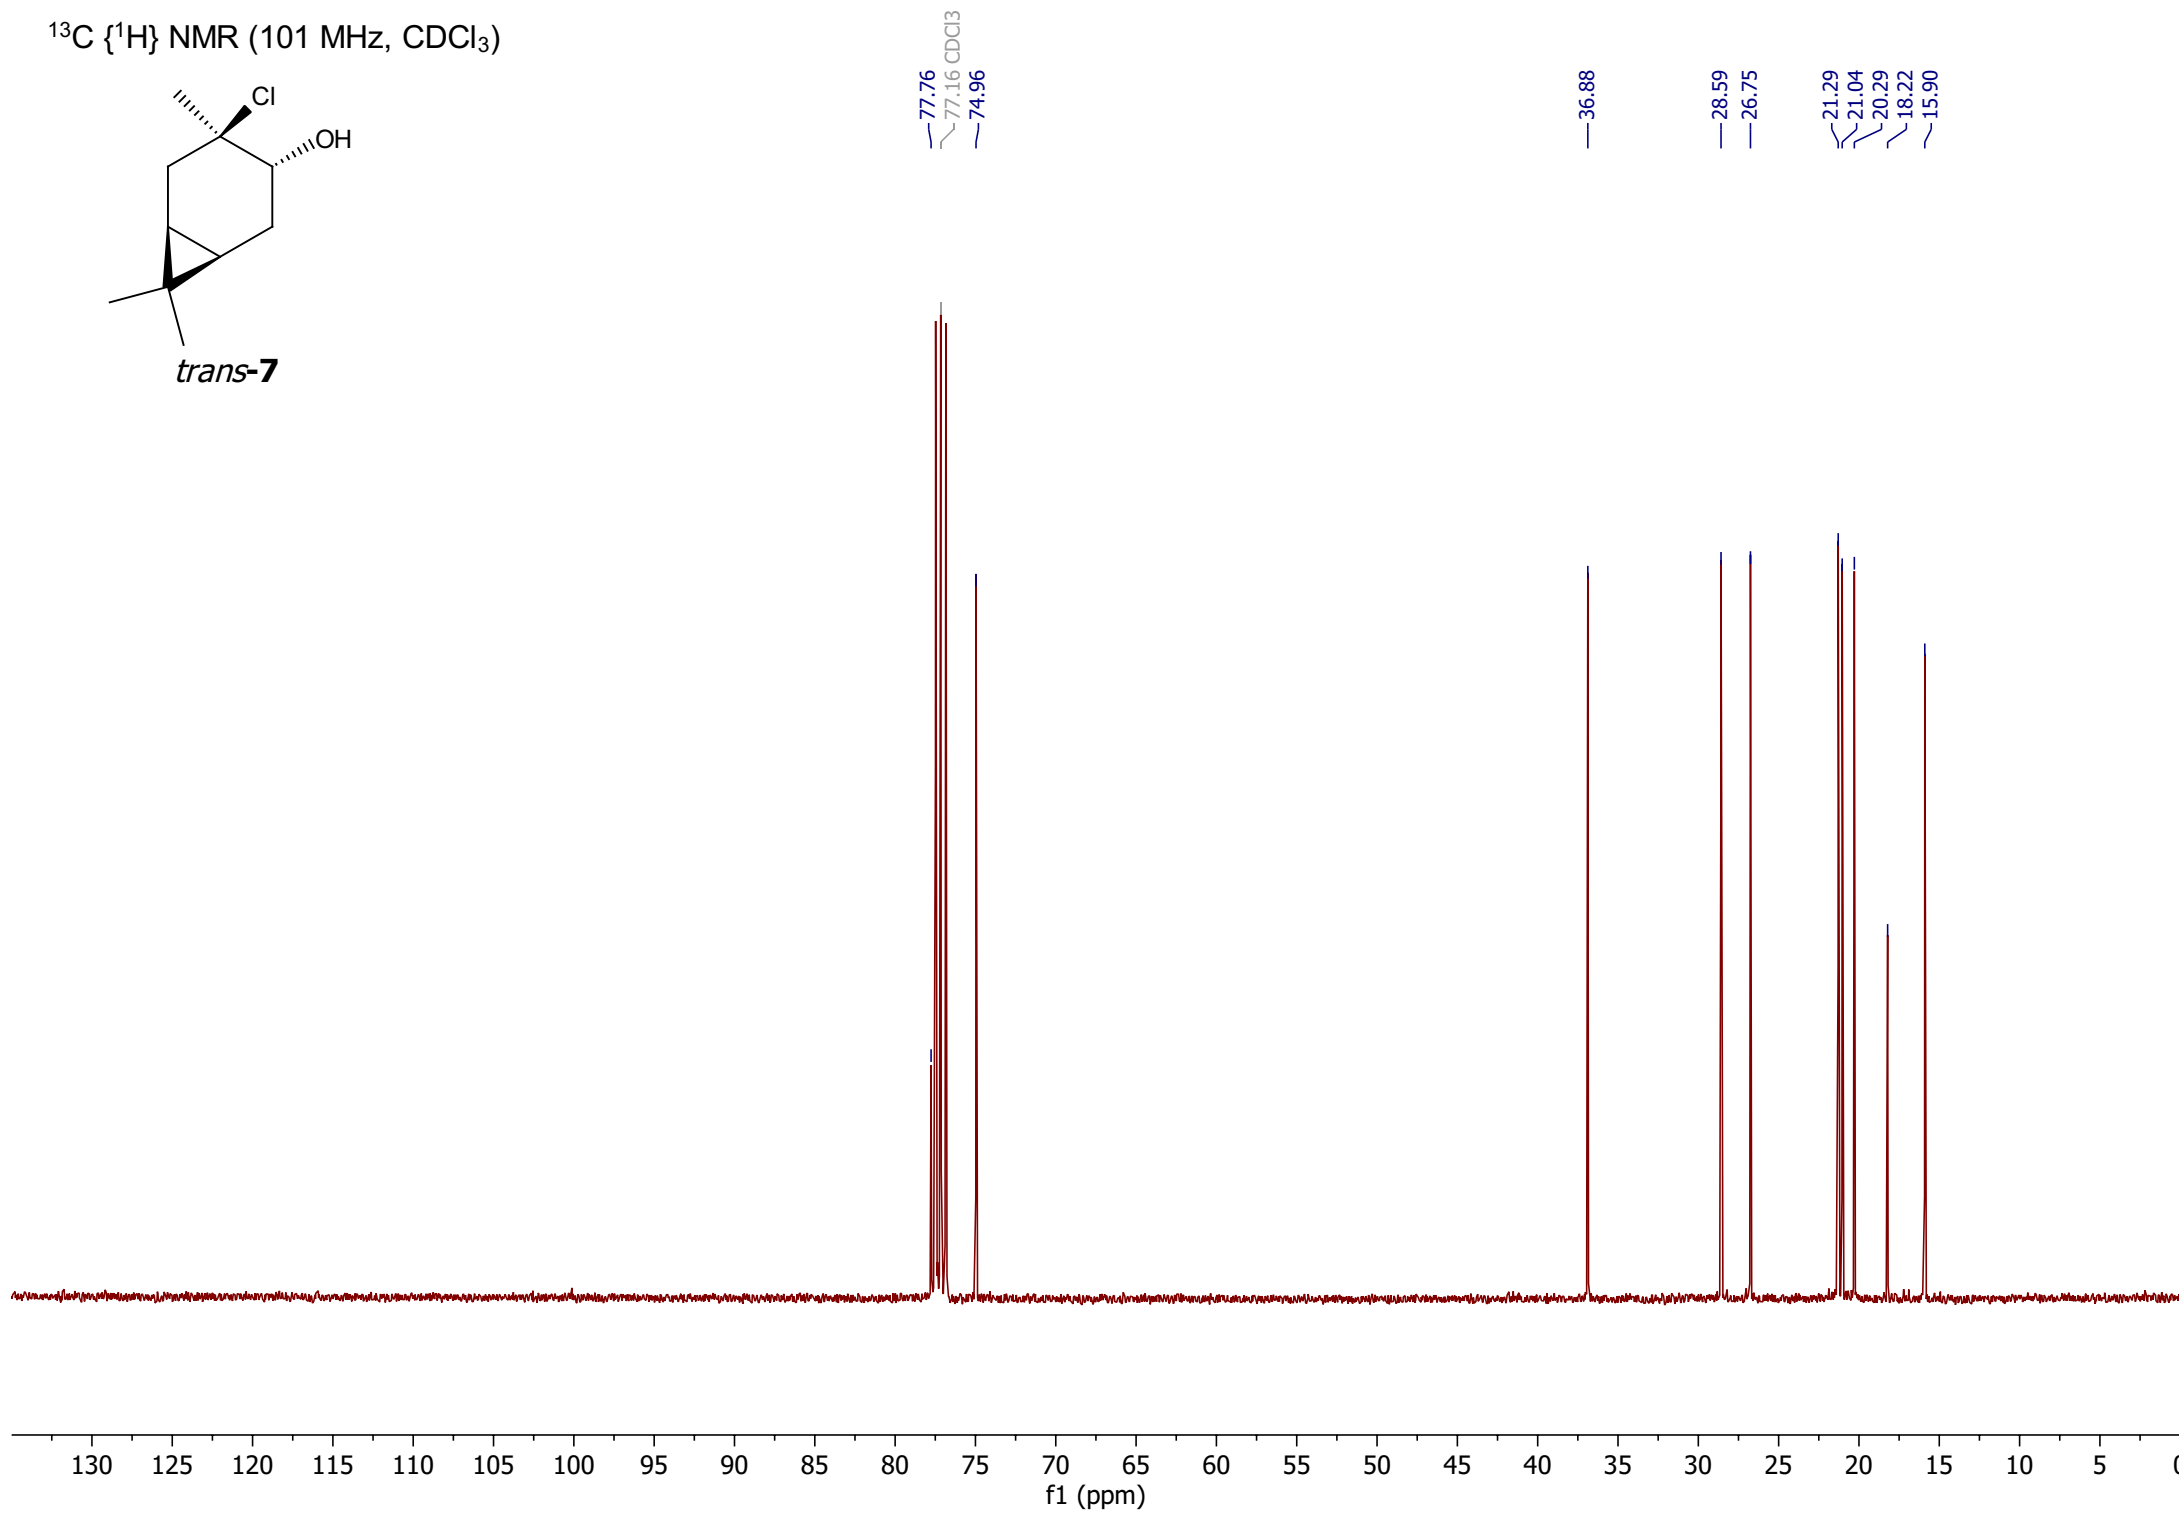

HSQC NMR ( $^1\text{H}$ - $^{13}\text{C}$ ,  $\text{CDCl}_3$ )

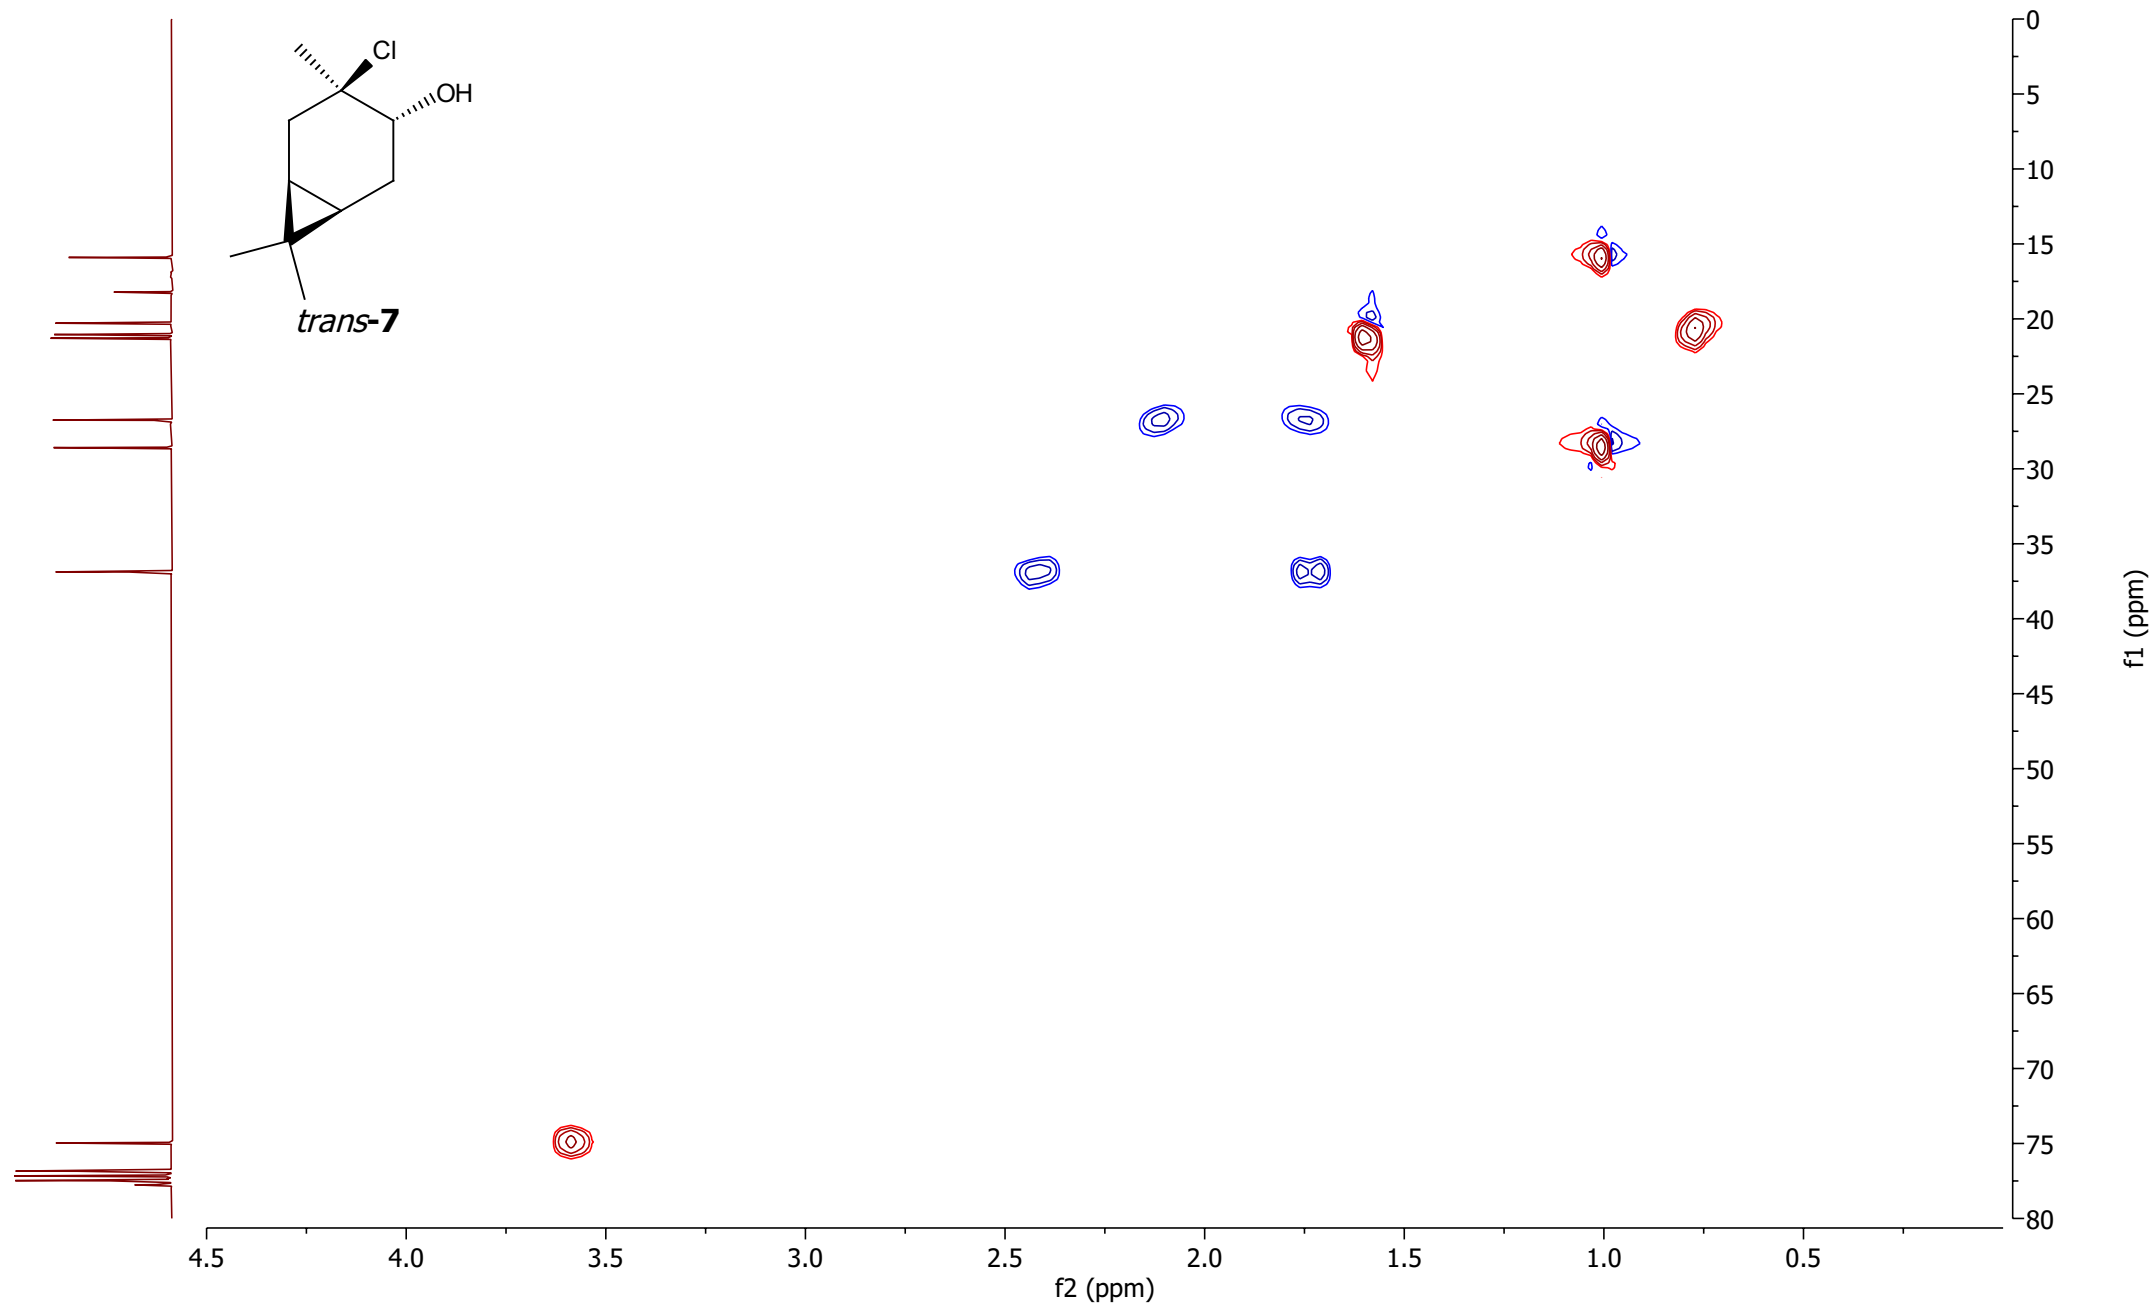

COSY NMR (400 MHz, CDCl<sub>3</sub>)

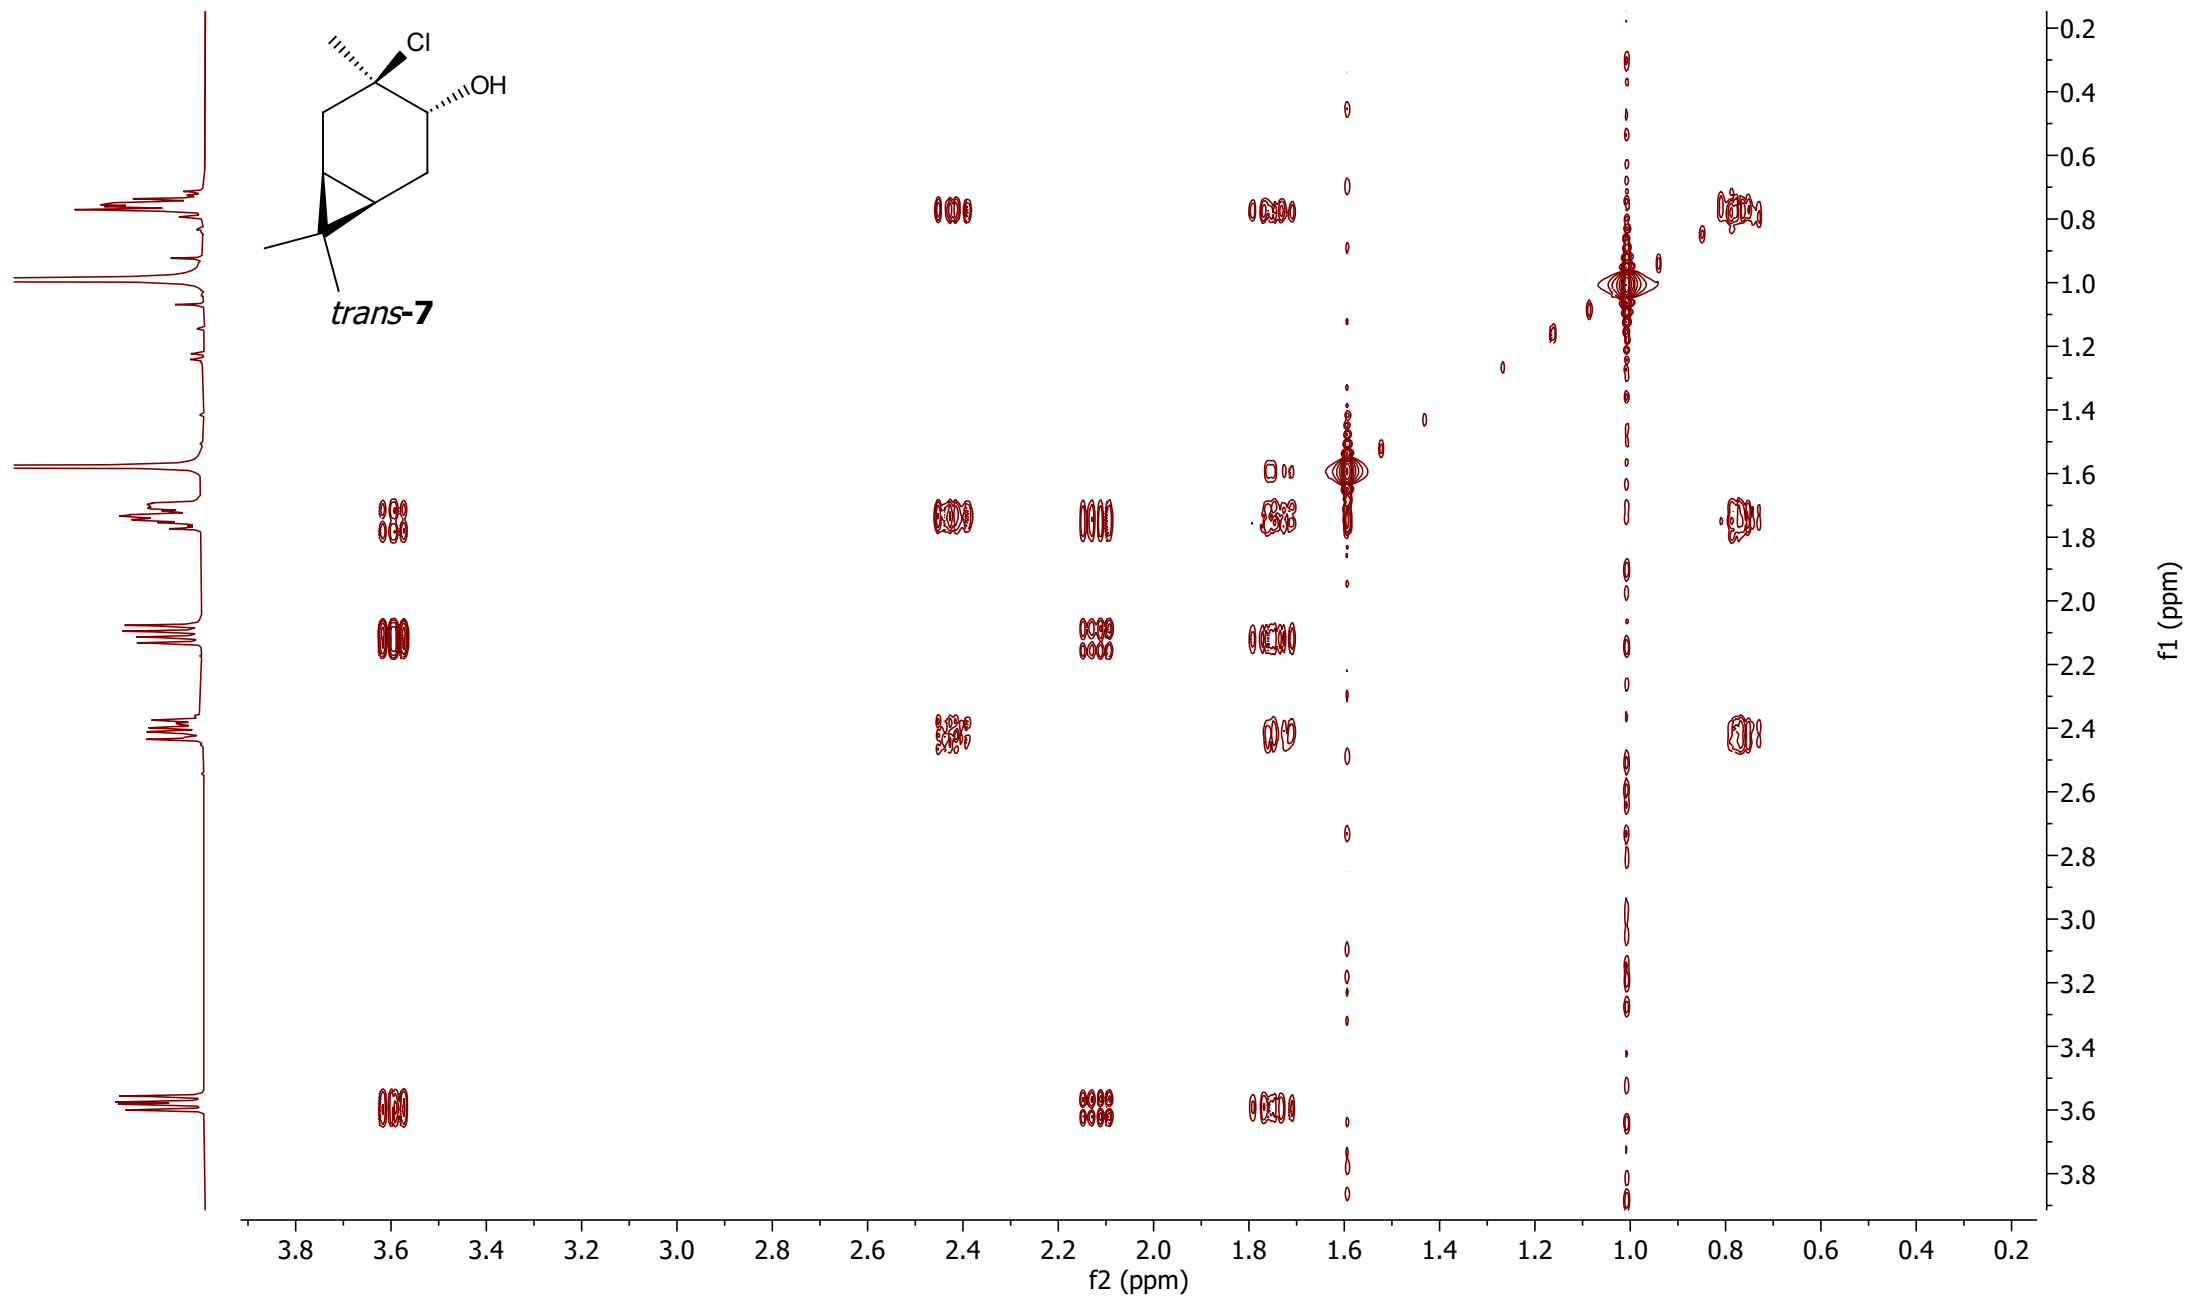

NOE NMR (400 MHz, CDCl<sub>3</sub>)

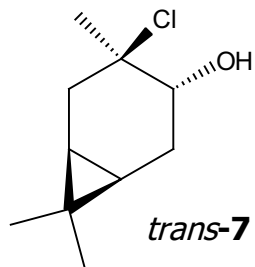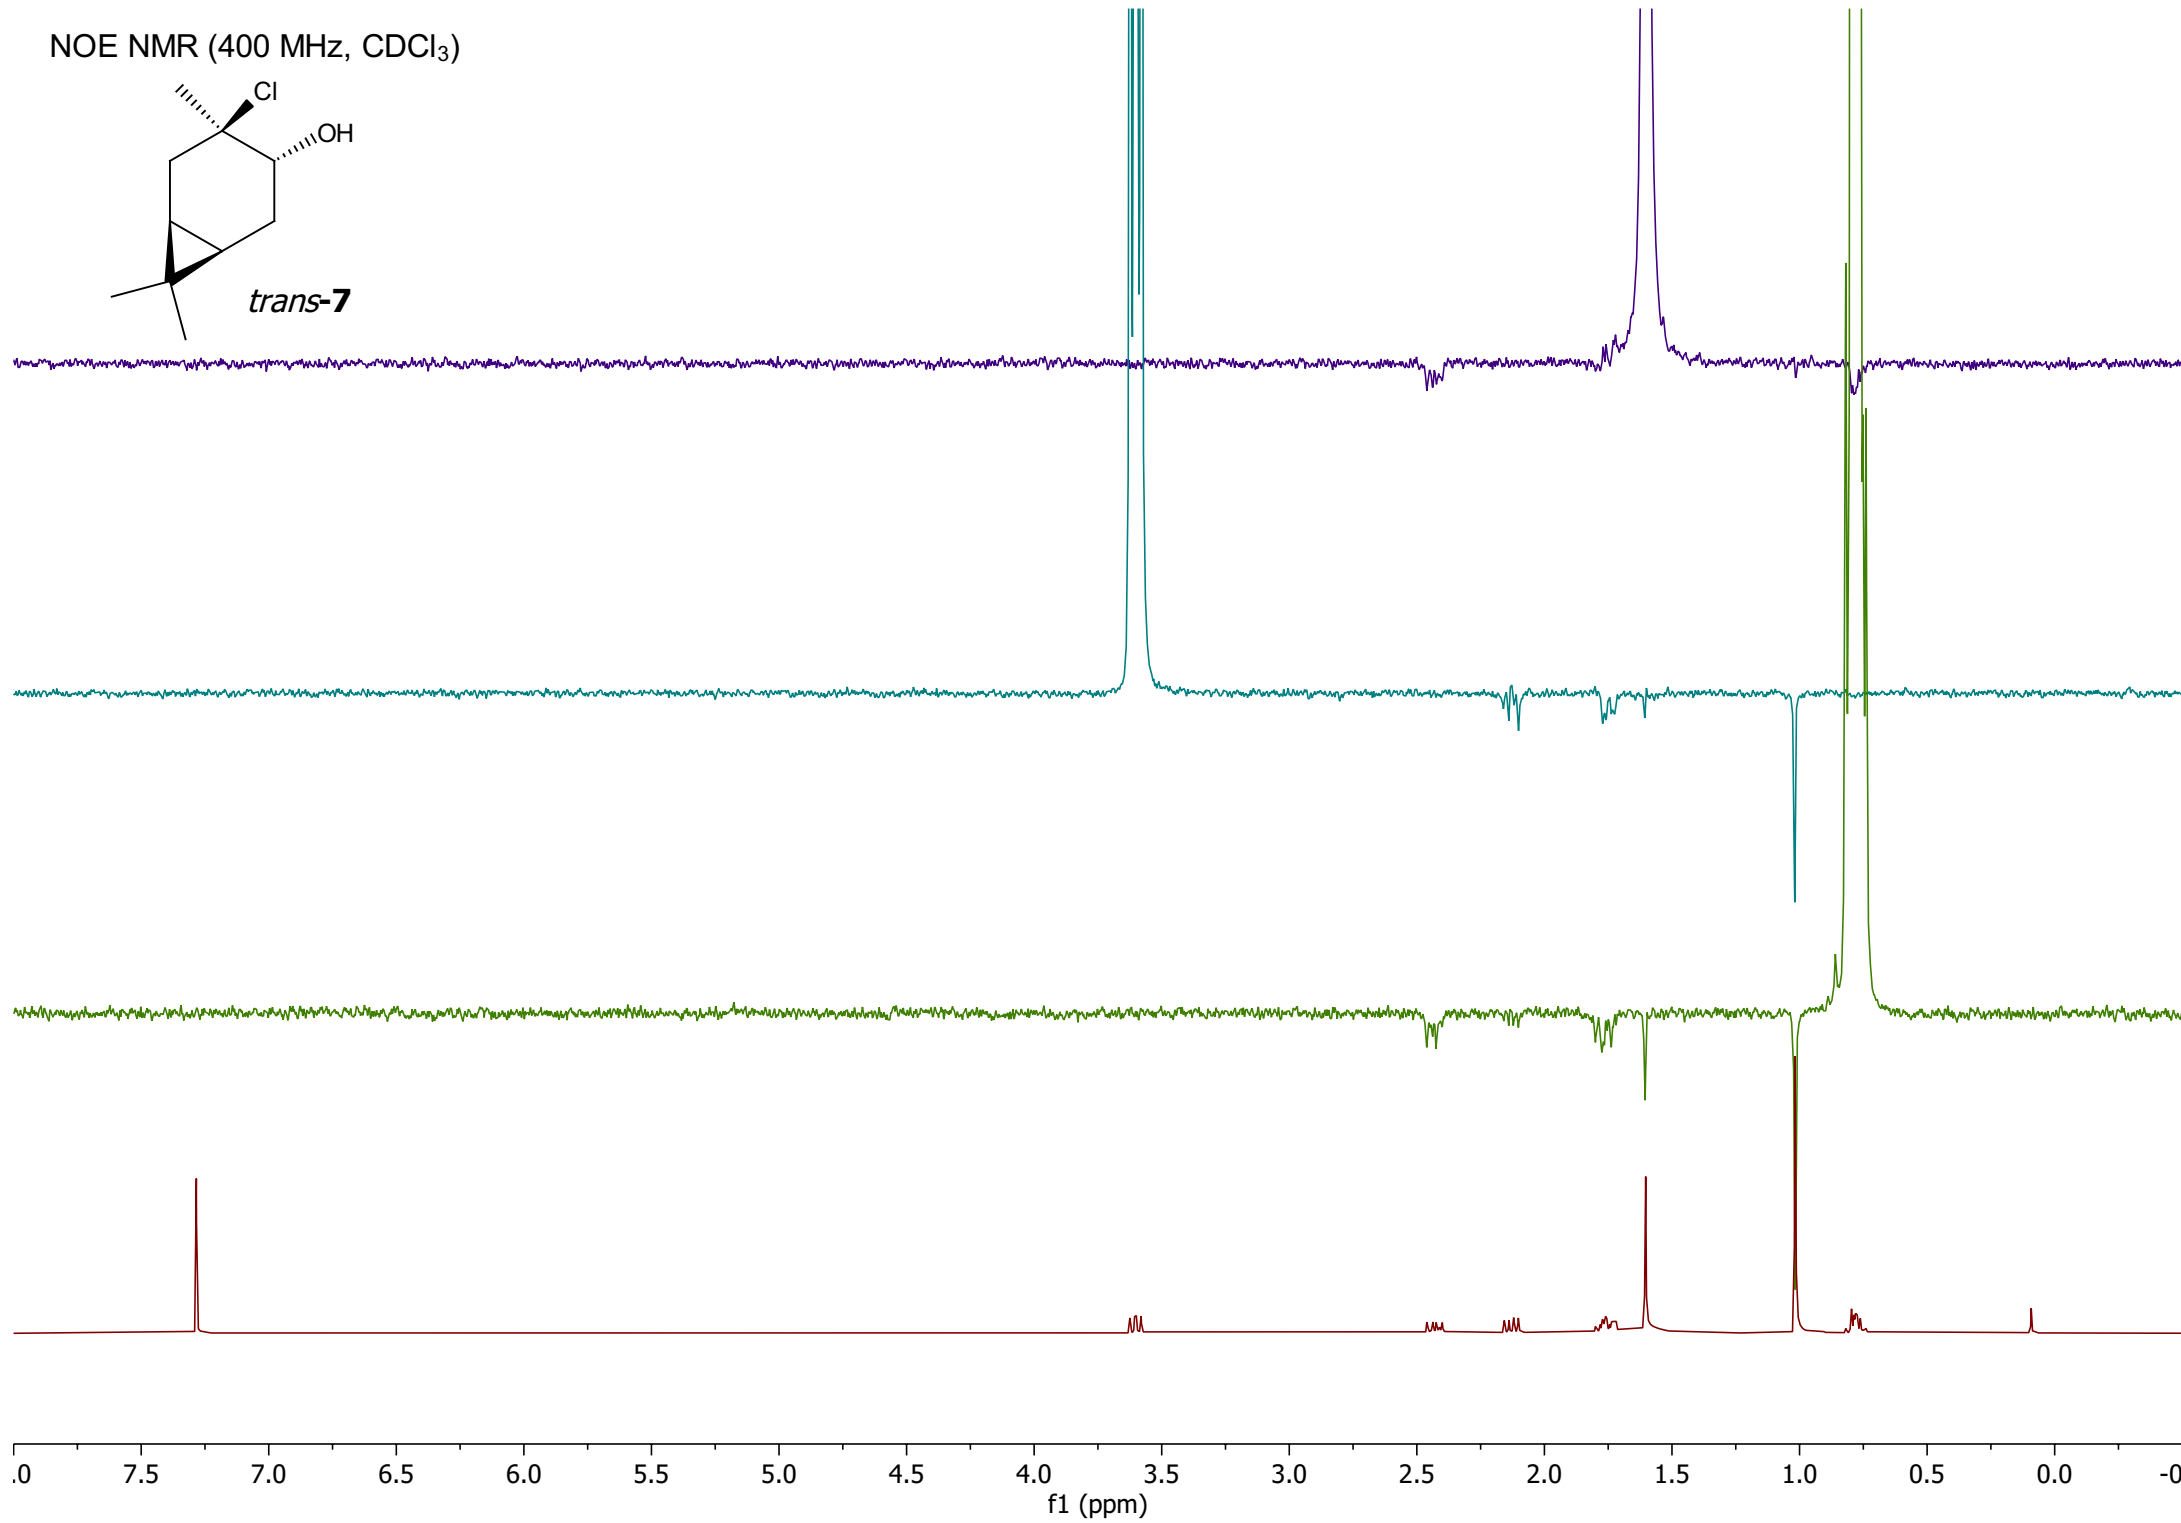

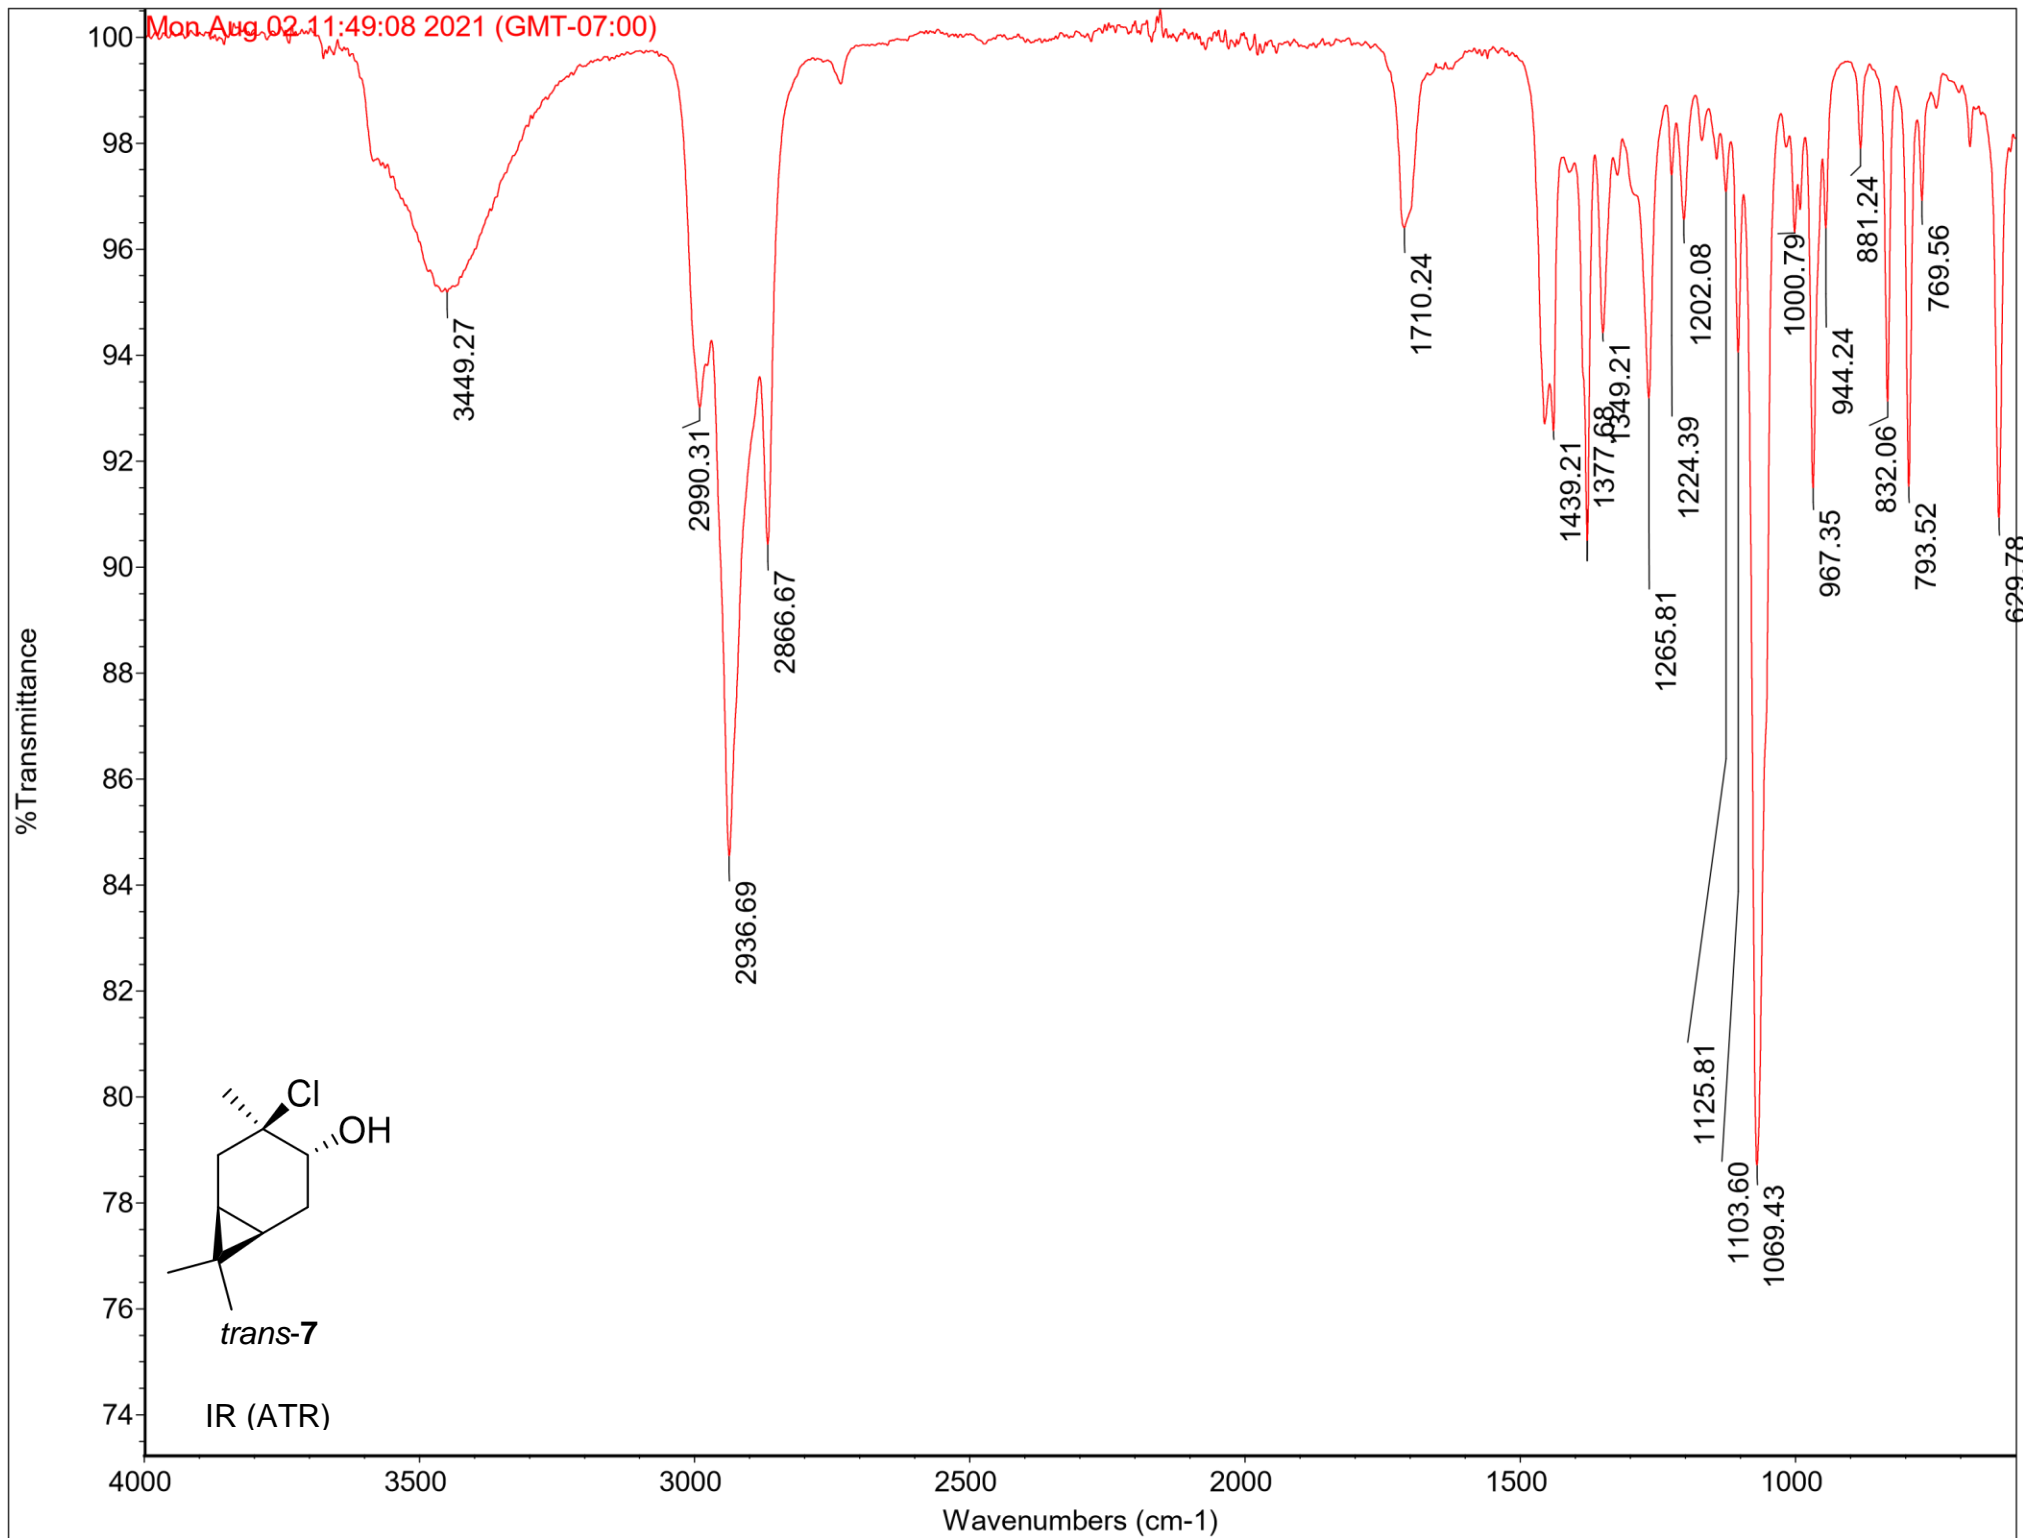

$^1\text{H}$  NMR (400 MHz,  $\text{CDCl}_3$ )

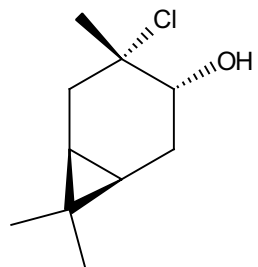

*cis-7*

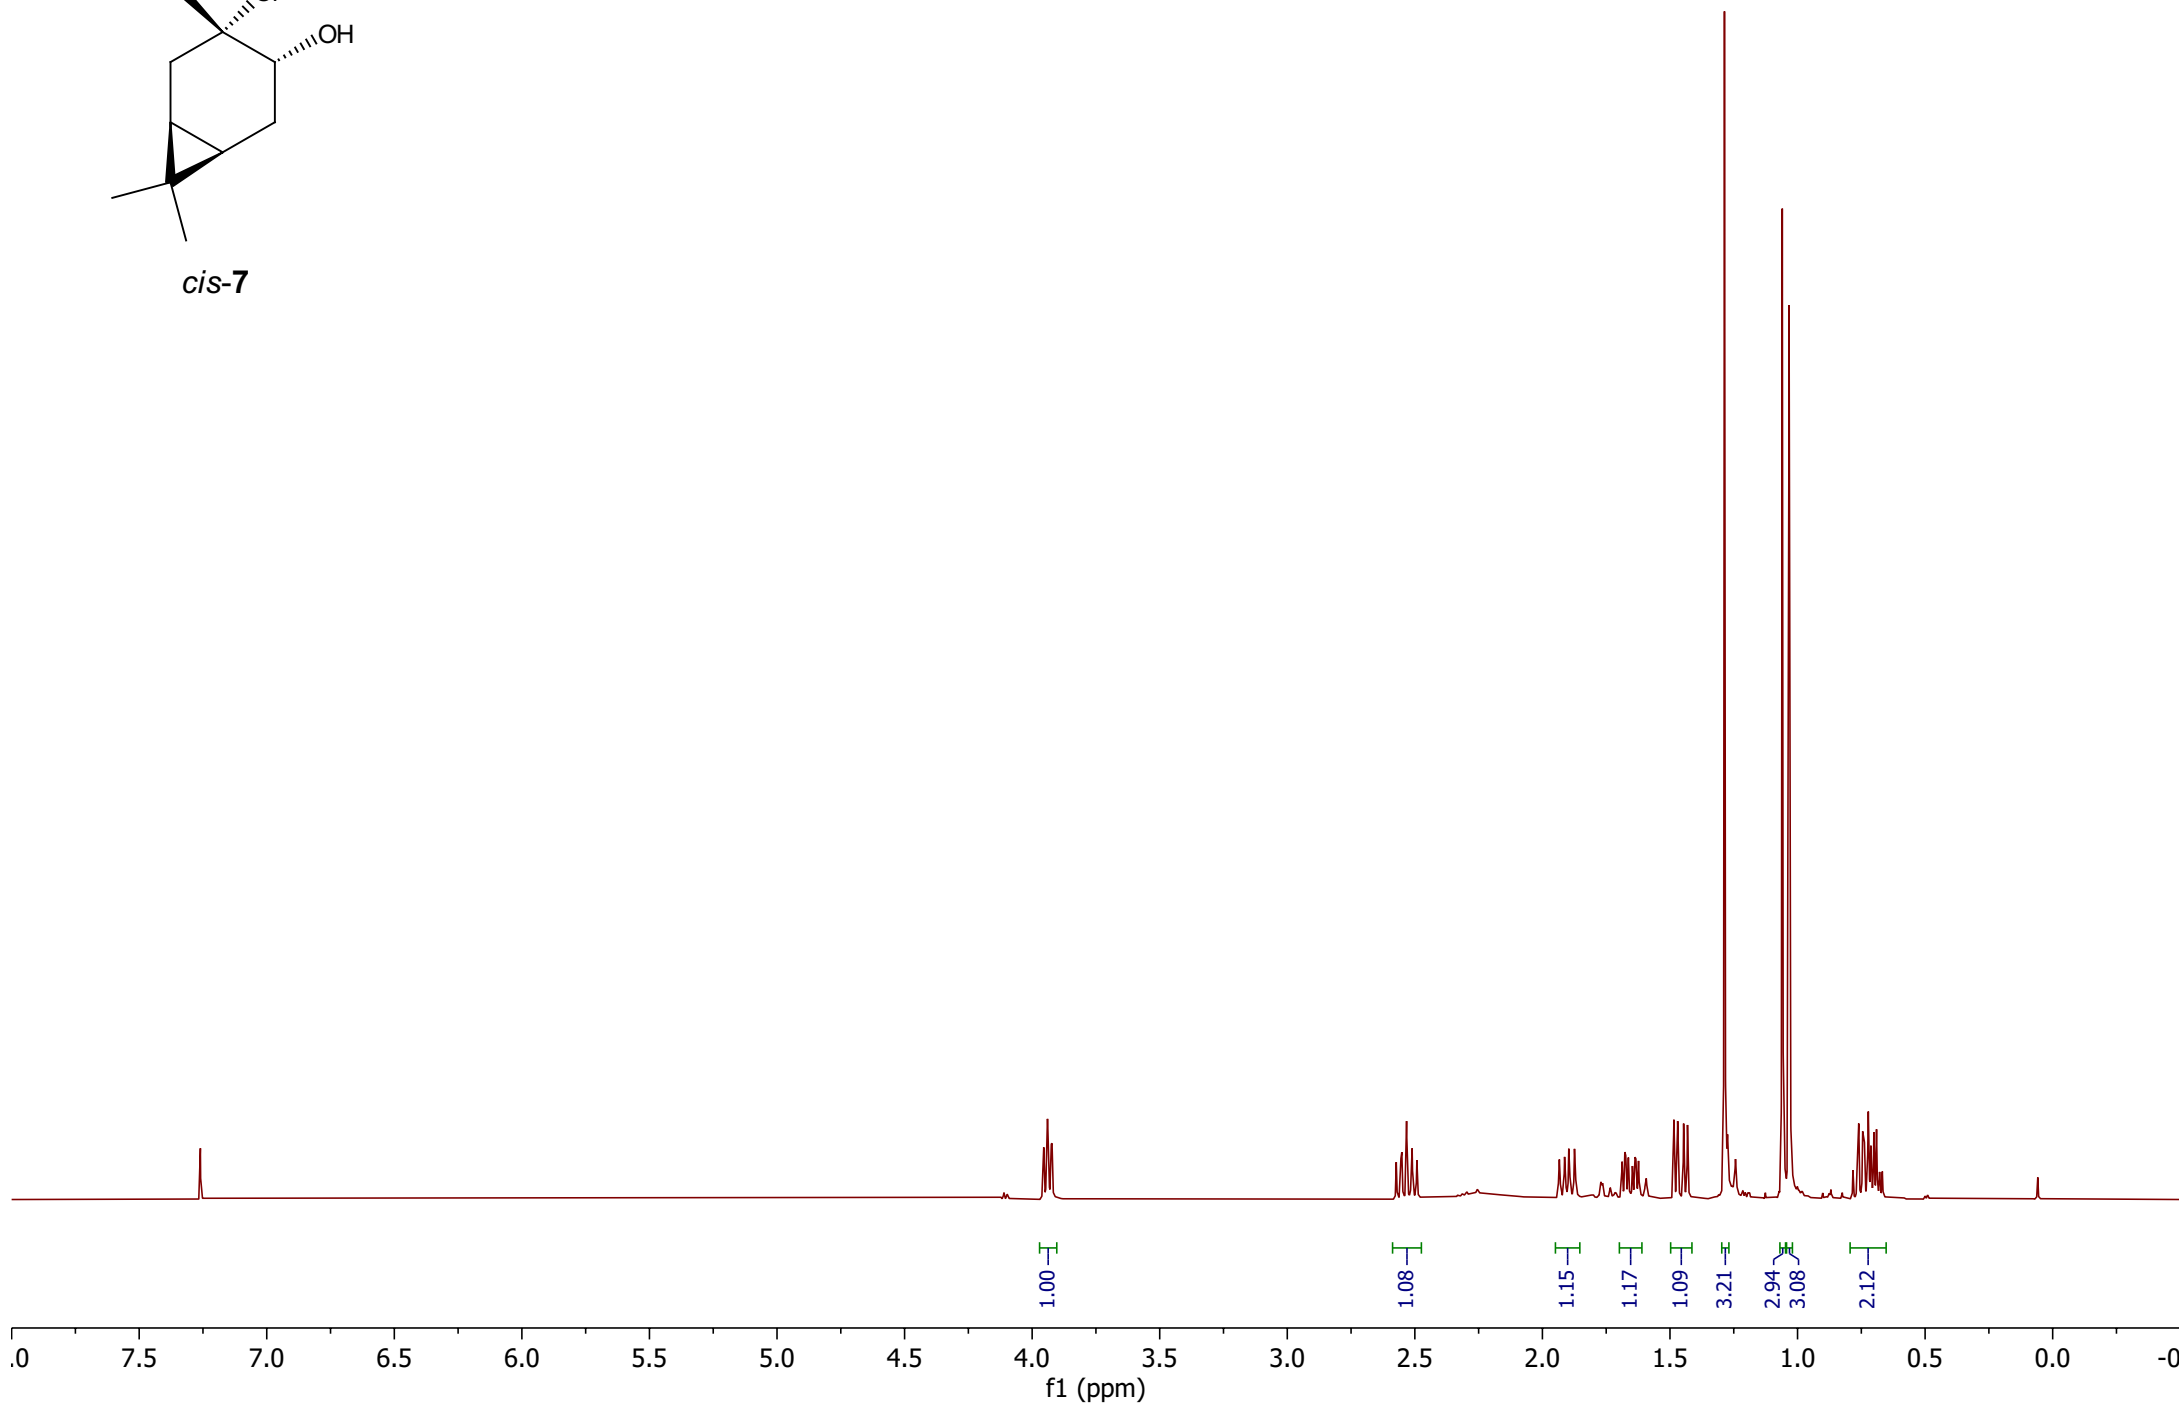

$^{13}\text{C}$   $\{^1\text{H}\}$  NMR (101 MHz,  $\text{CDCl}_3$ )



*cis-7*

— 77.16  $\text{CDCl}_3$

— 71.96

— 63.73

— 29.64

— 28.60

— 27.62

— 26.74

— 19.27

— 18.84

— 18.04

— 15.67

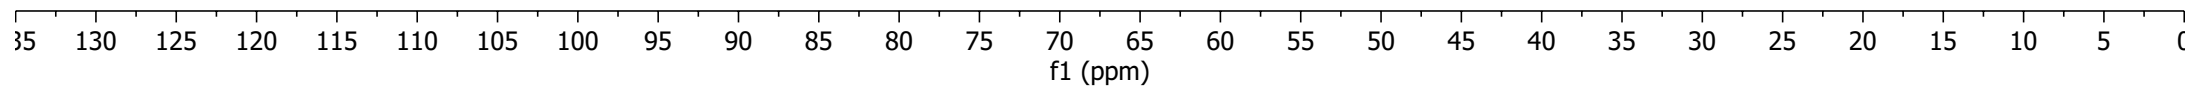

HSQC NMR ( $^1\text{H}$ - $^{13}\text{C}$ ,  $\text{CDCl}_3$ )

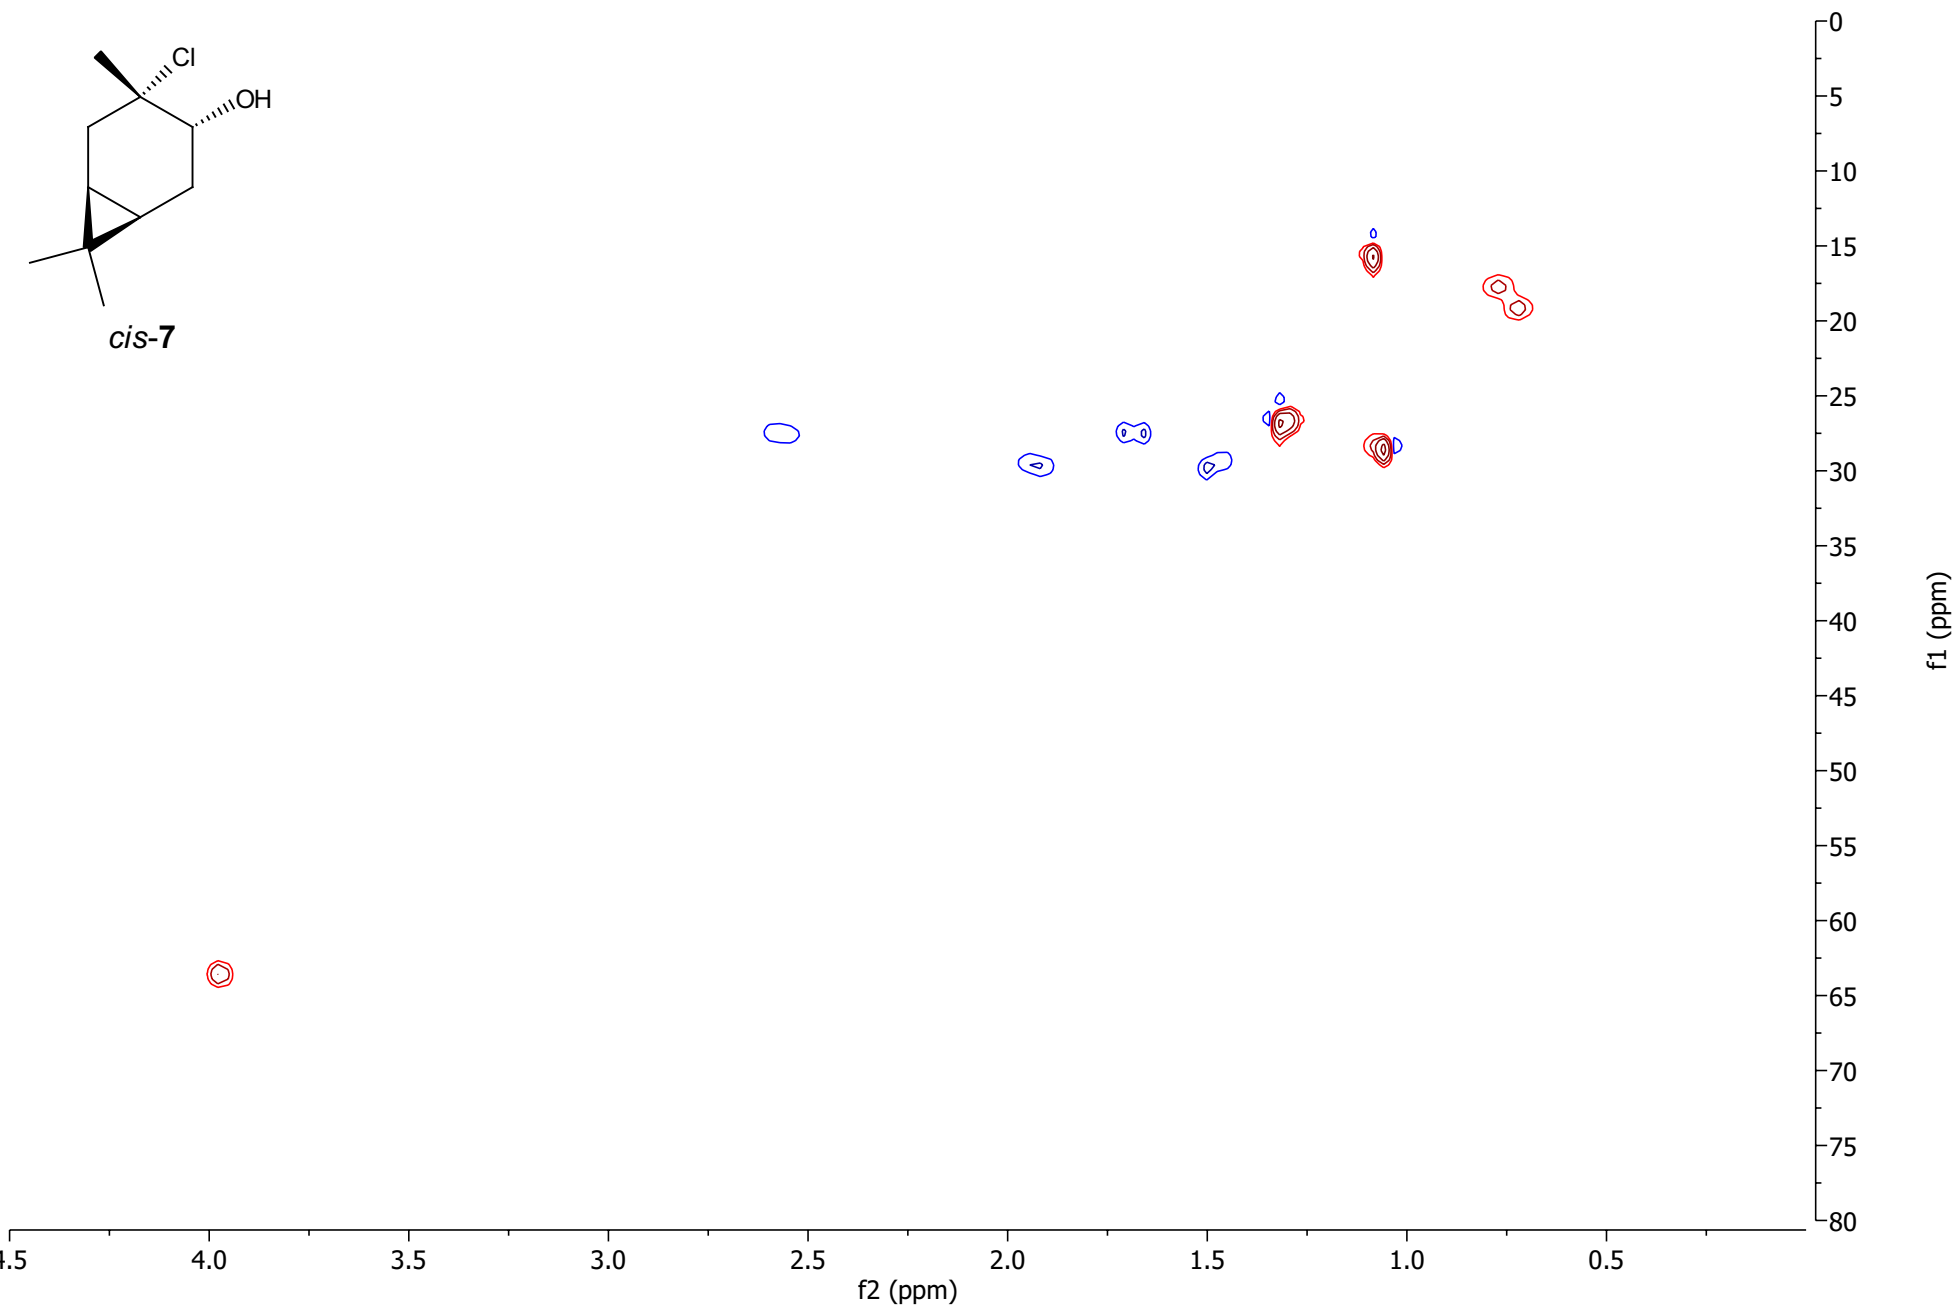



COSY NMR (400 MHz, CDCl<sub>3</sub>)

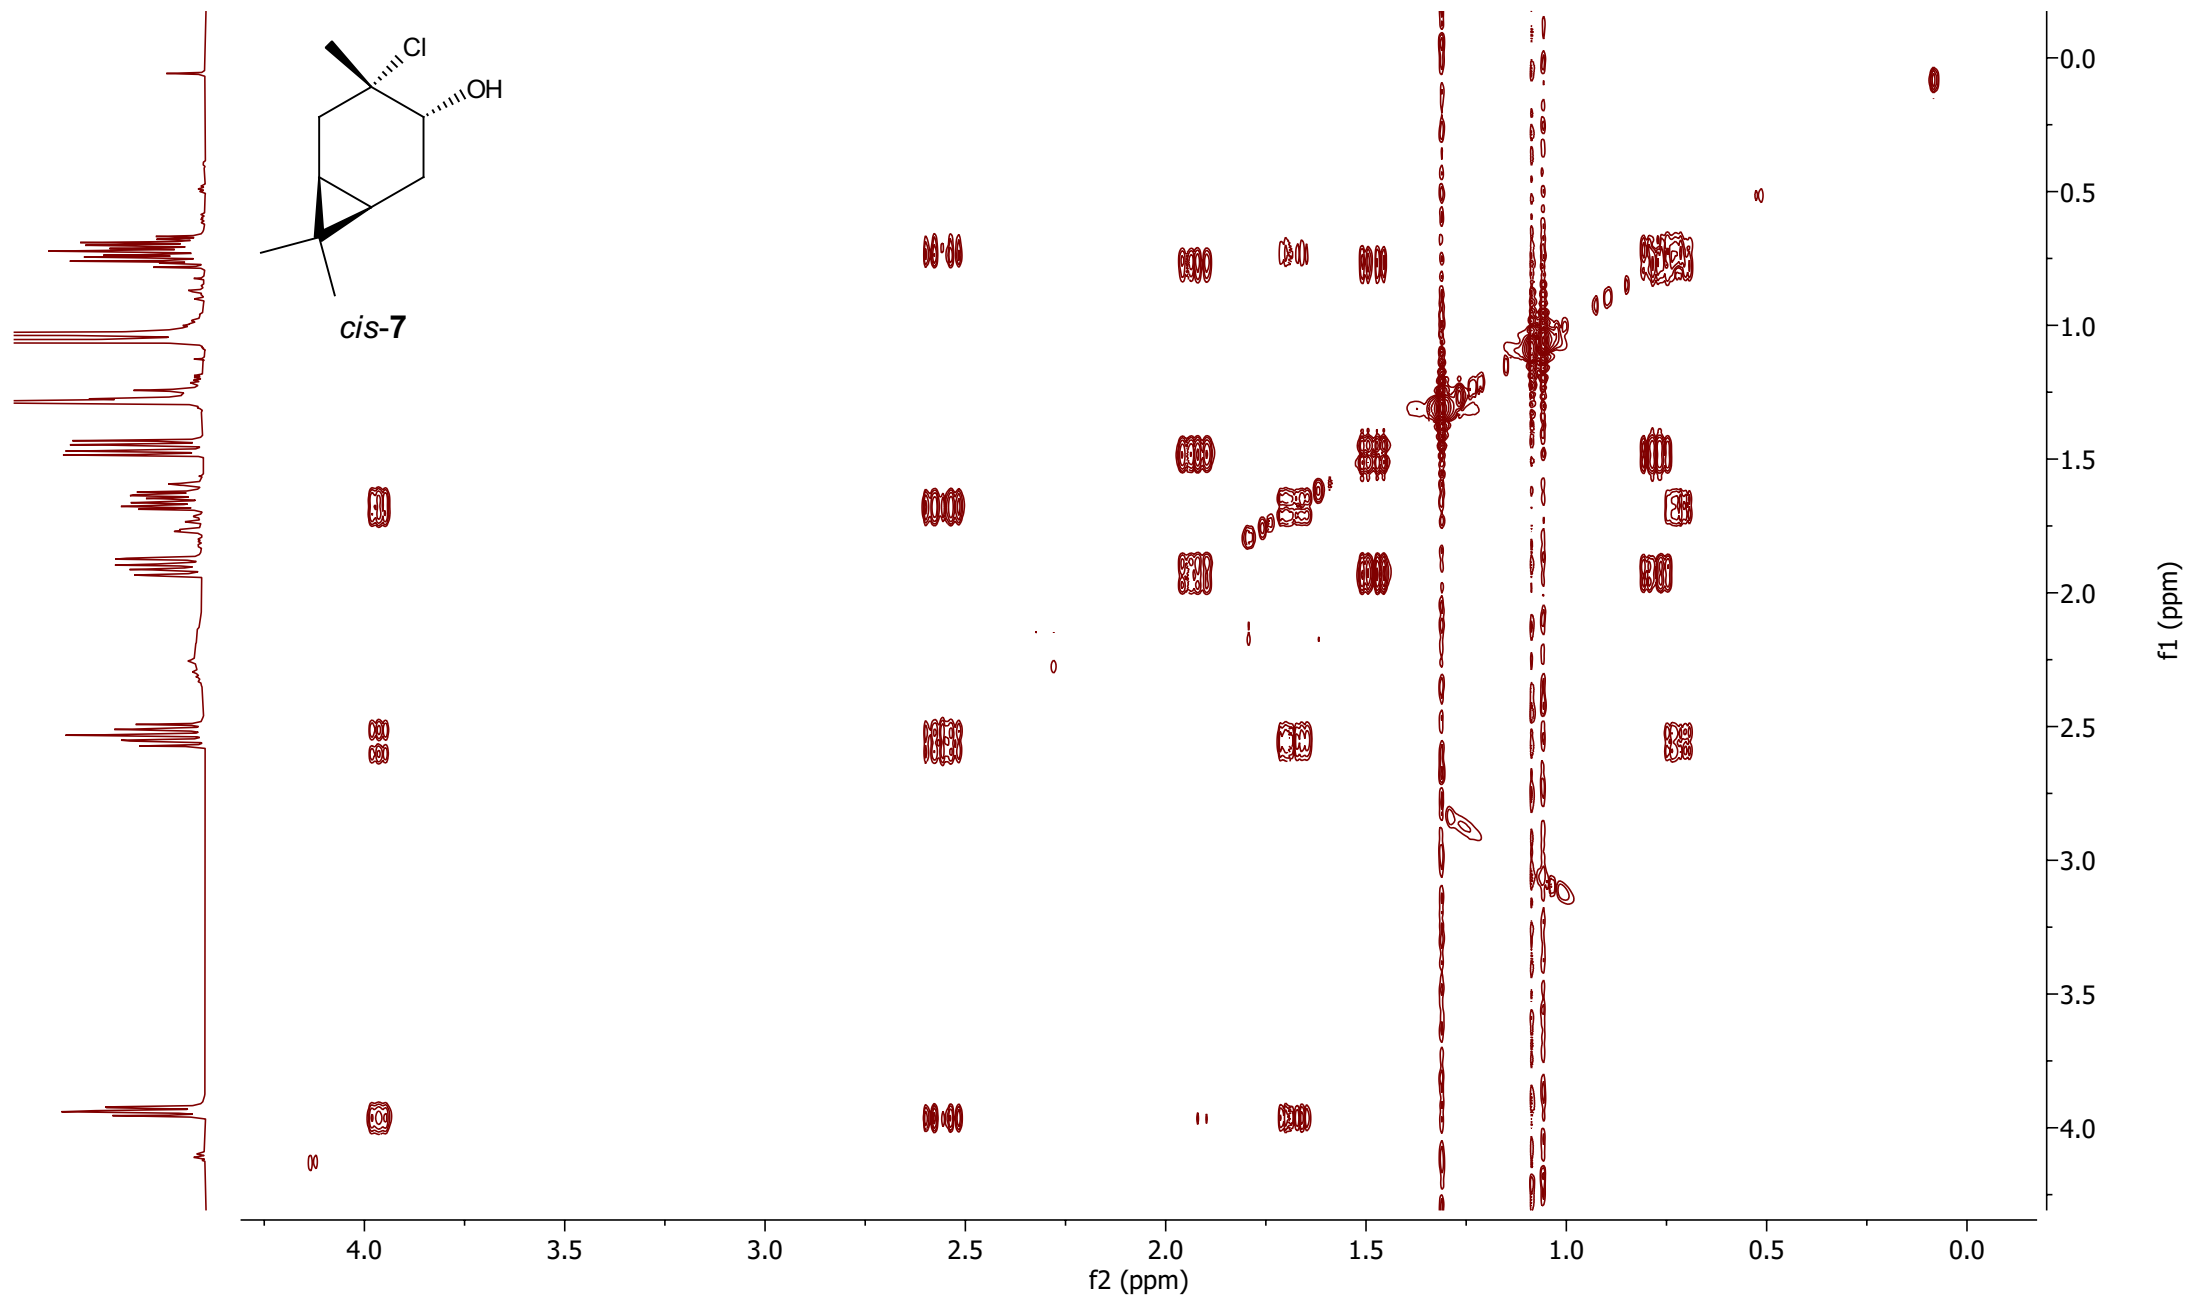

NOE NMR (400 MHz, CDCl<sub>3</sub>)

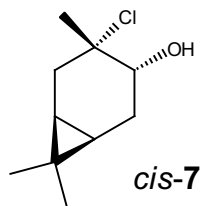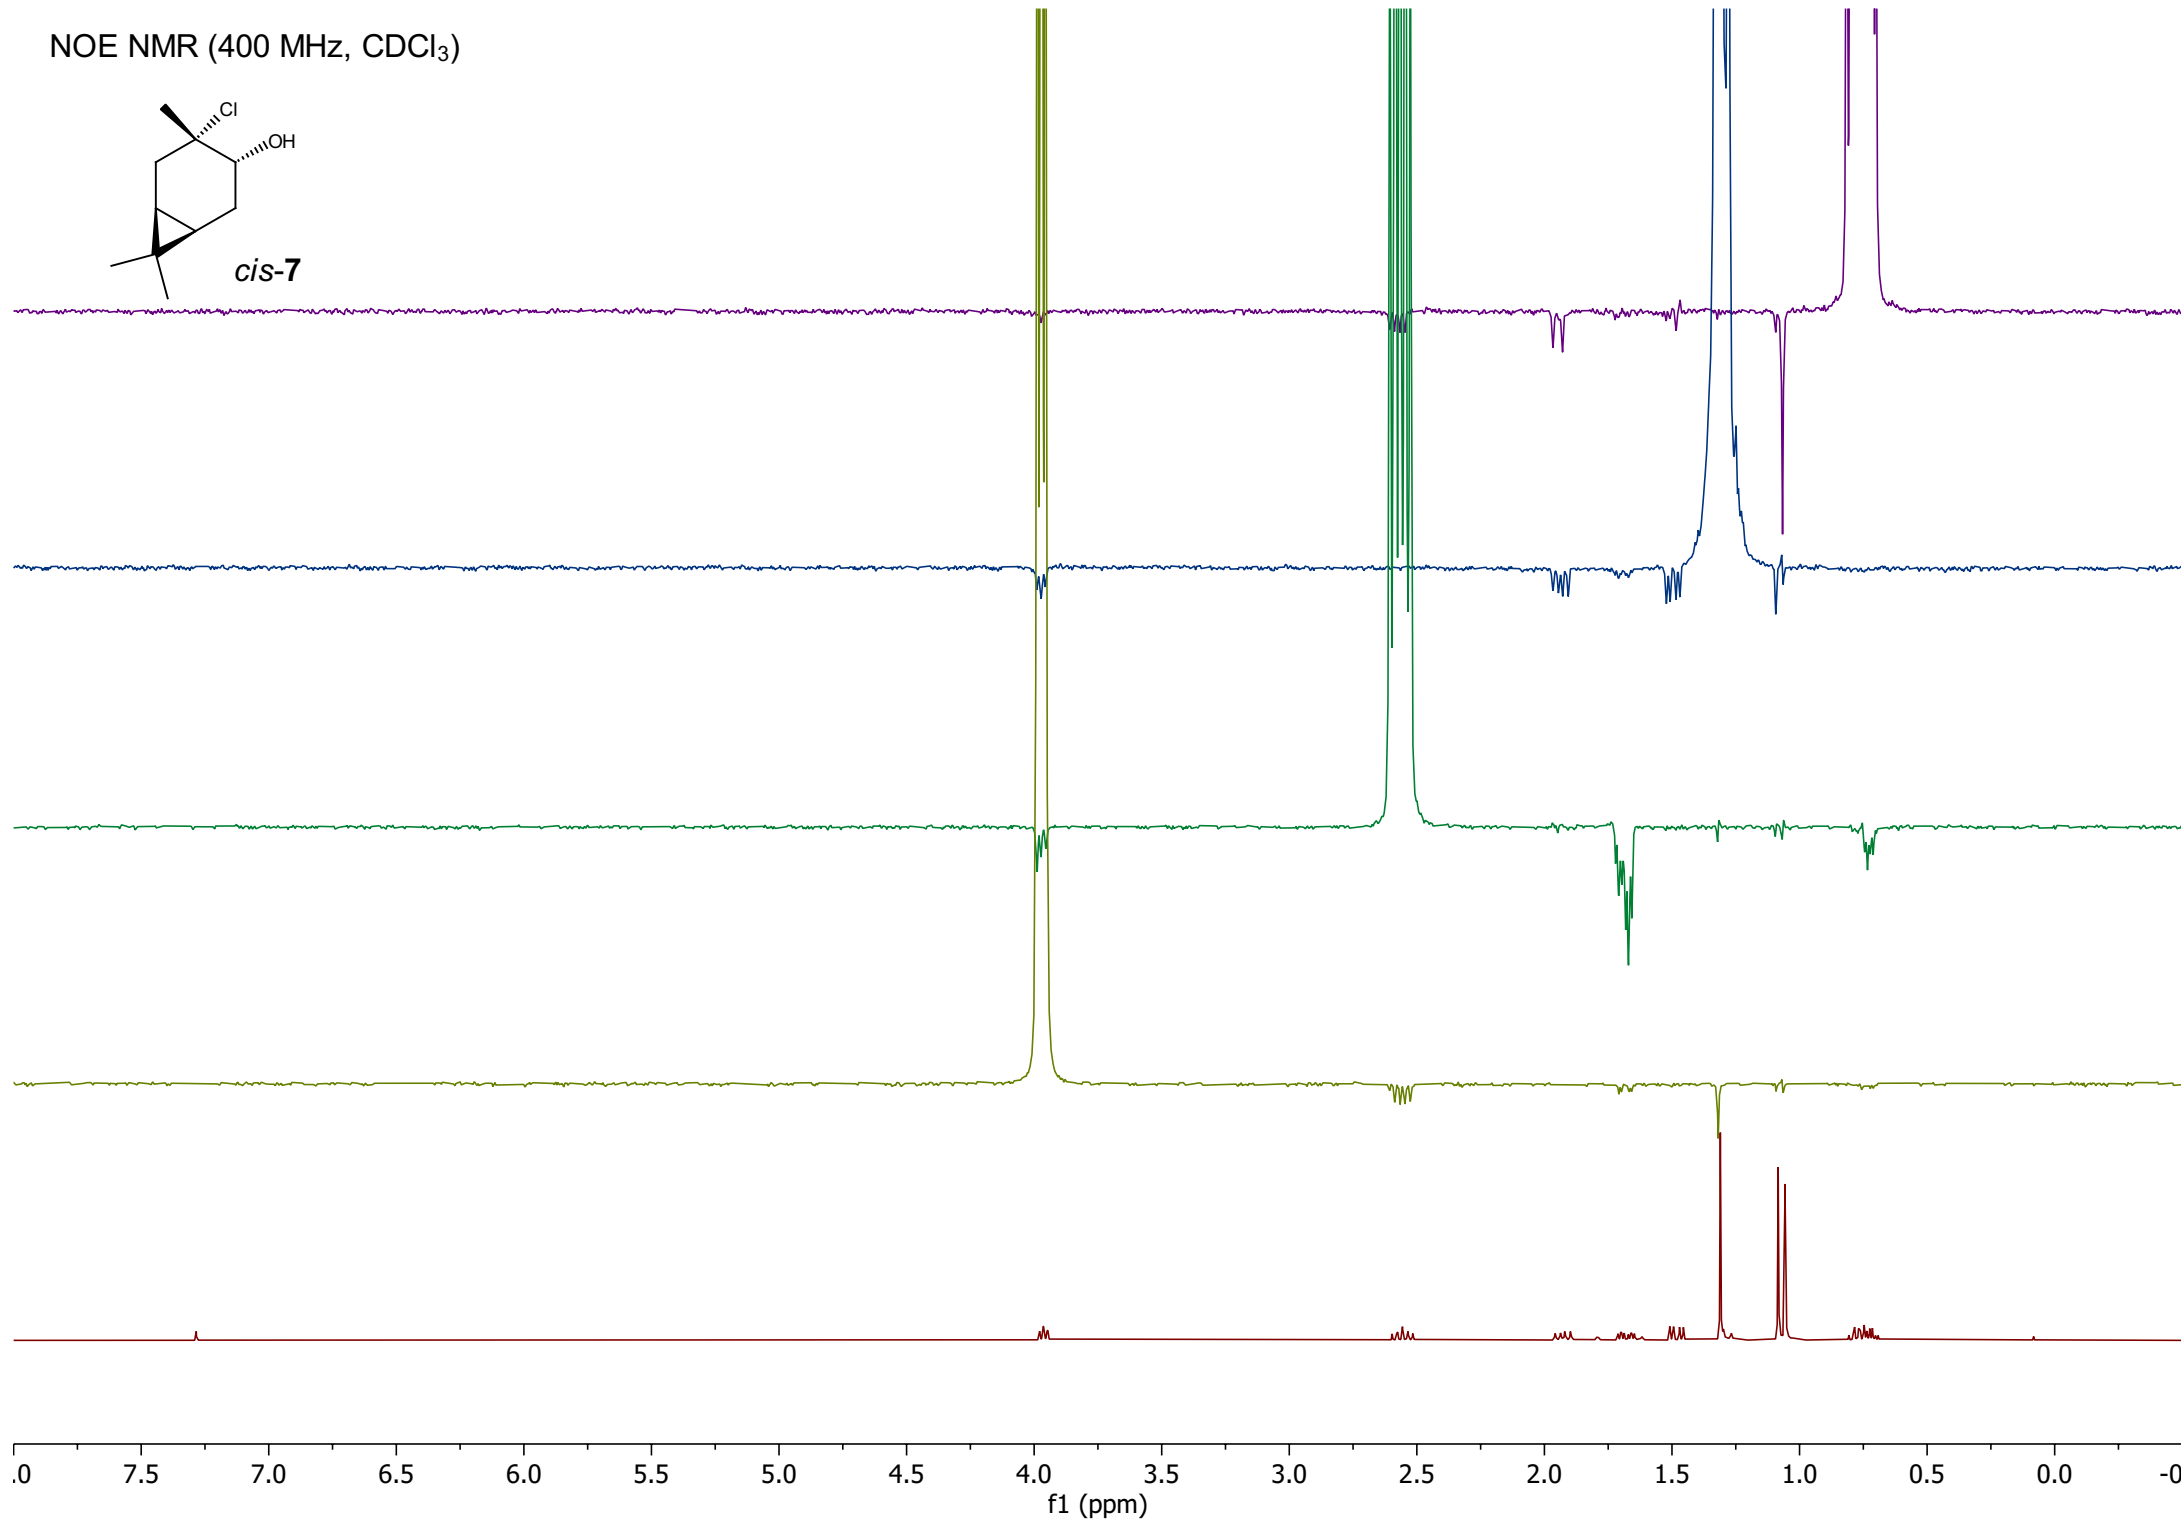

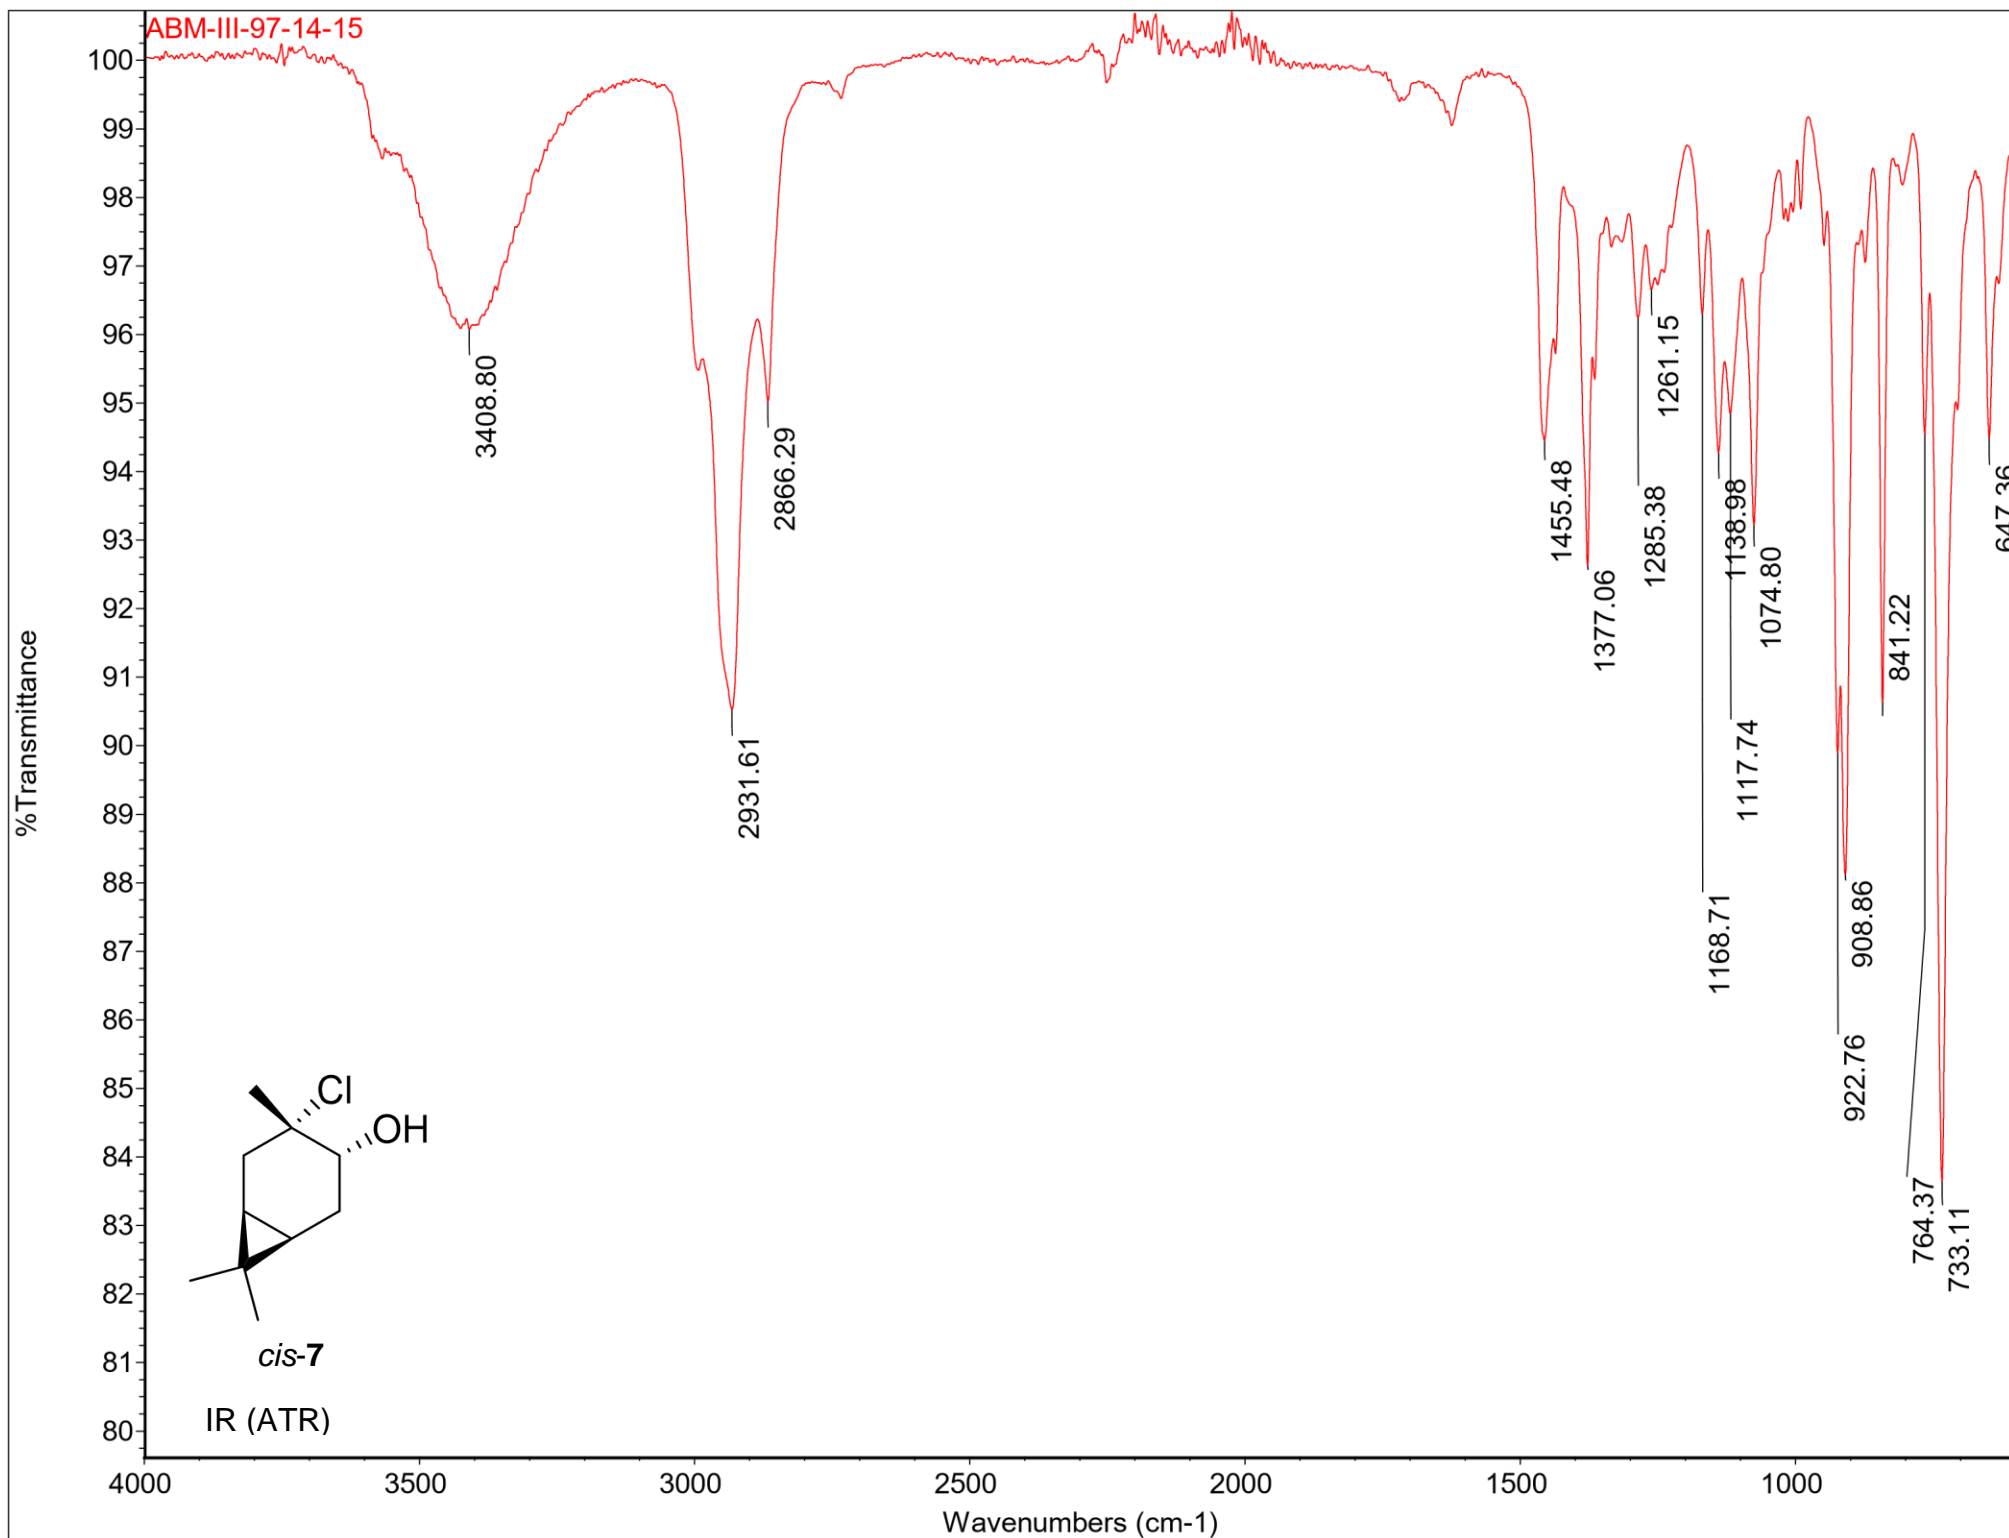

$^1\text{H}$  NMR (400 MHz) CHN **1** Reaction Mixtures in  $\text{D}_2\text{O}/\text{DMSO-}d_6$

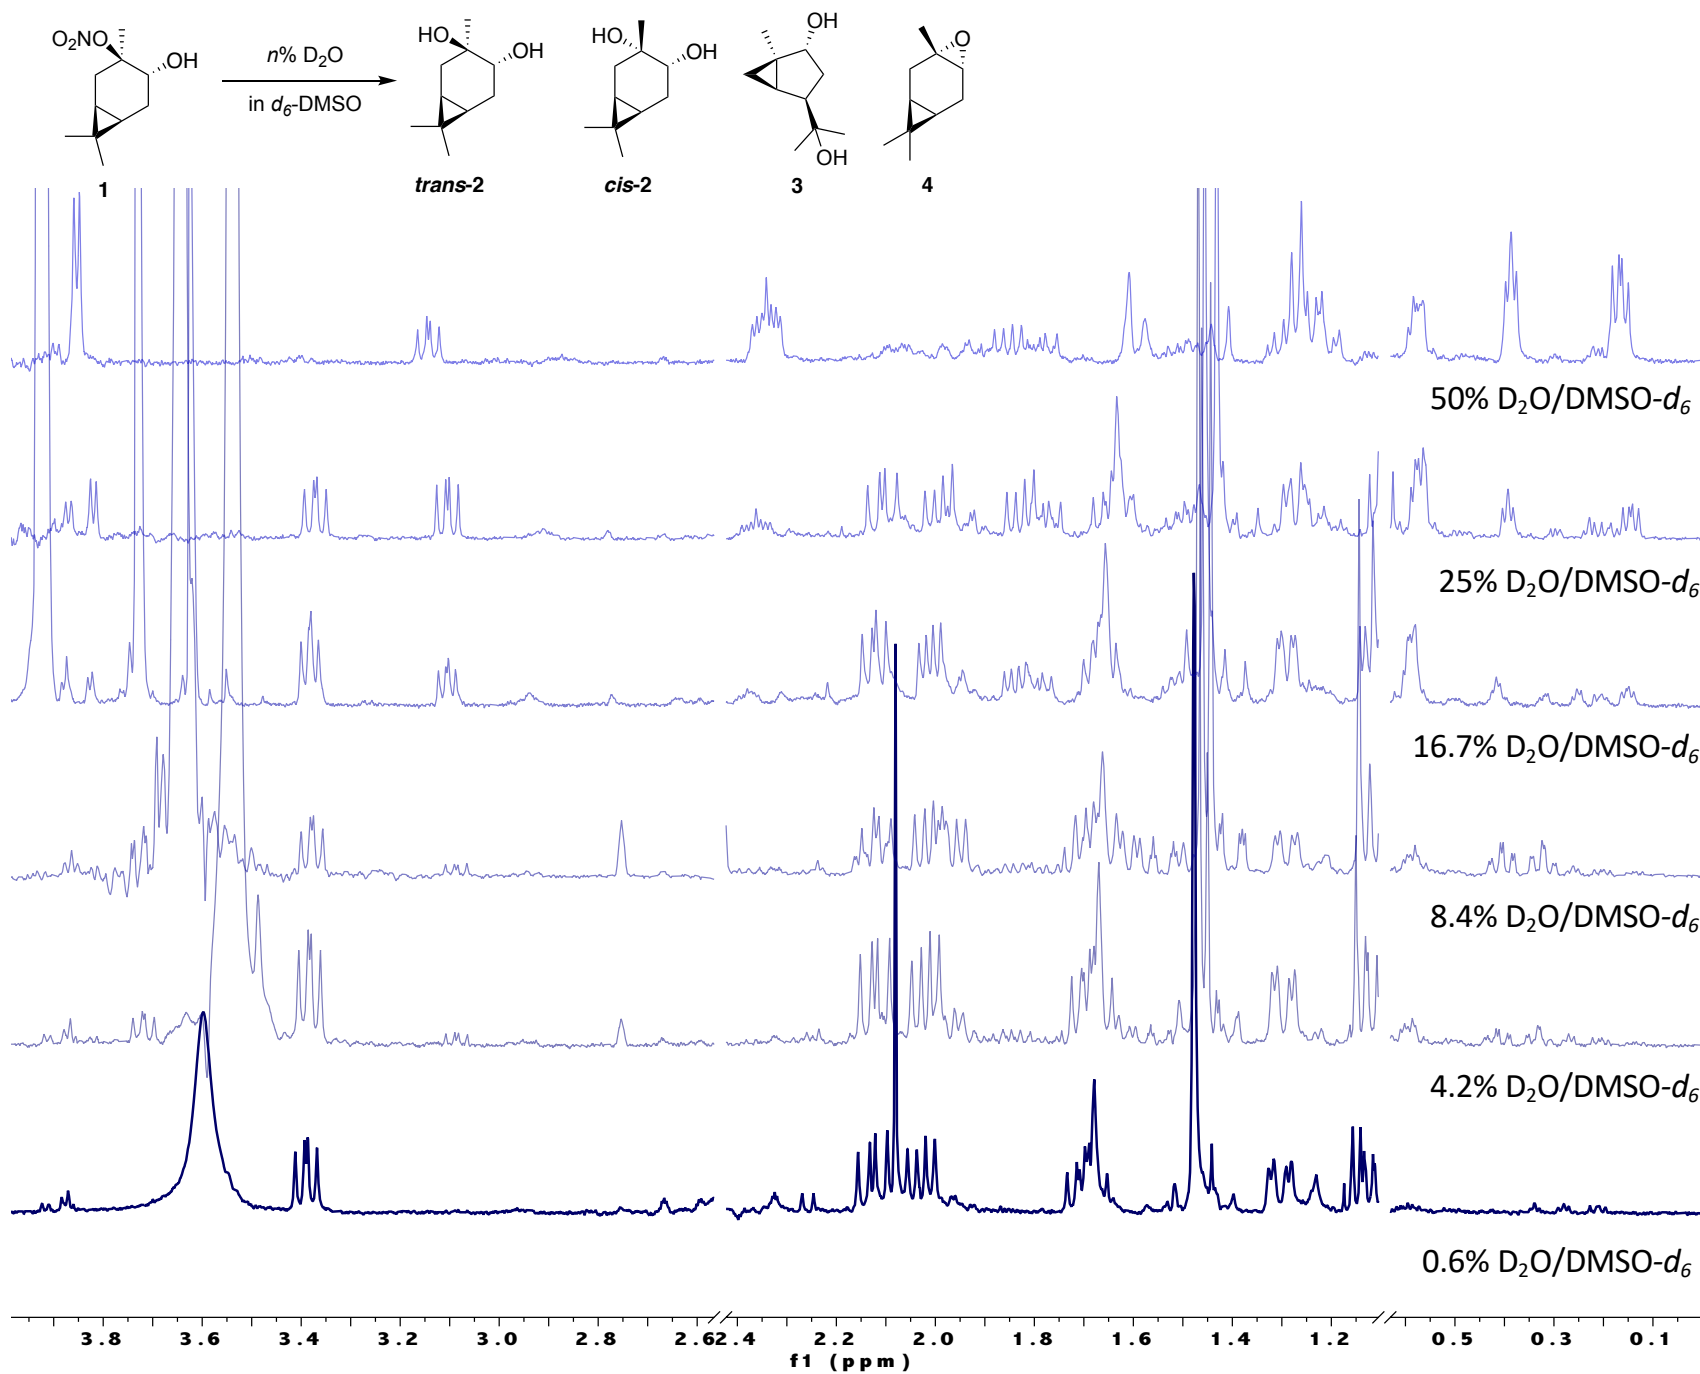

$^1\text{H}$  NMR (400 MHz) CHN **1** Reaction Mixtures in  $\text{D}_2\text{O}/\text{MeOD-}d_4$

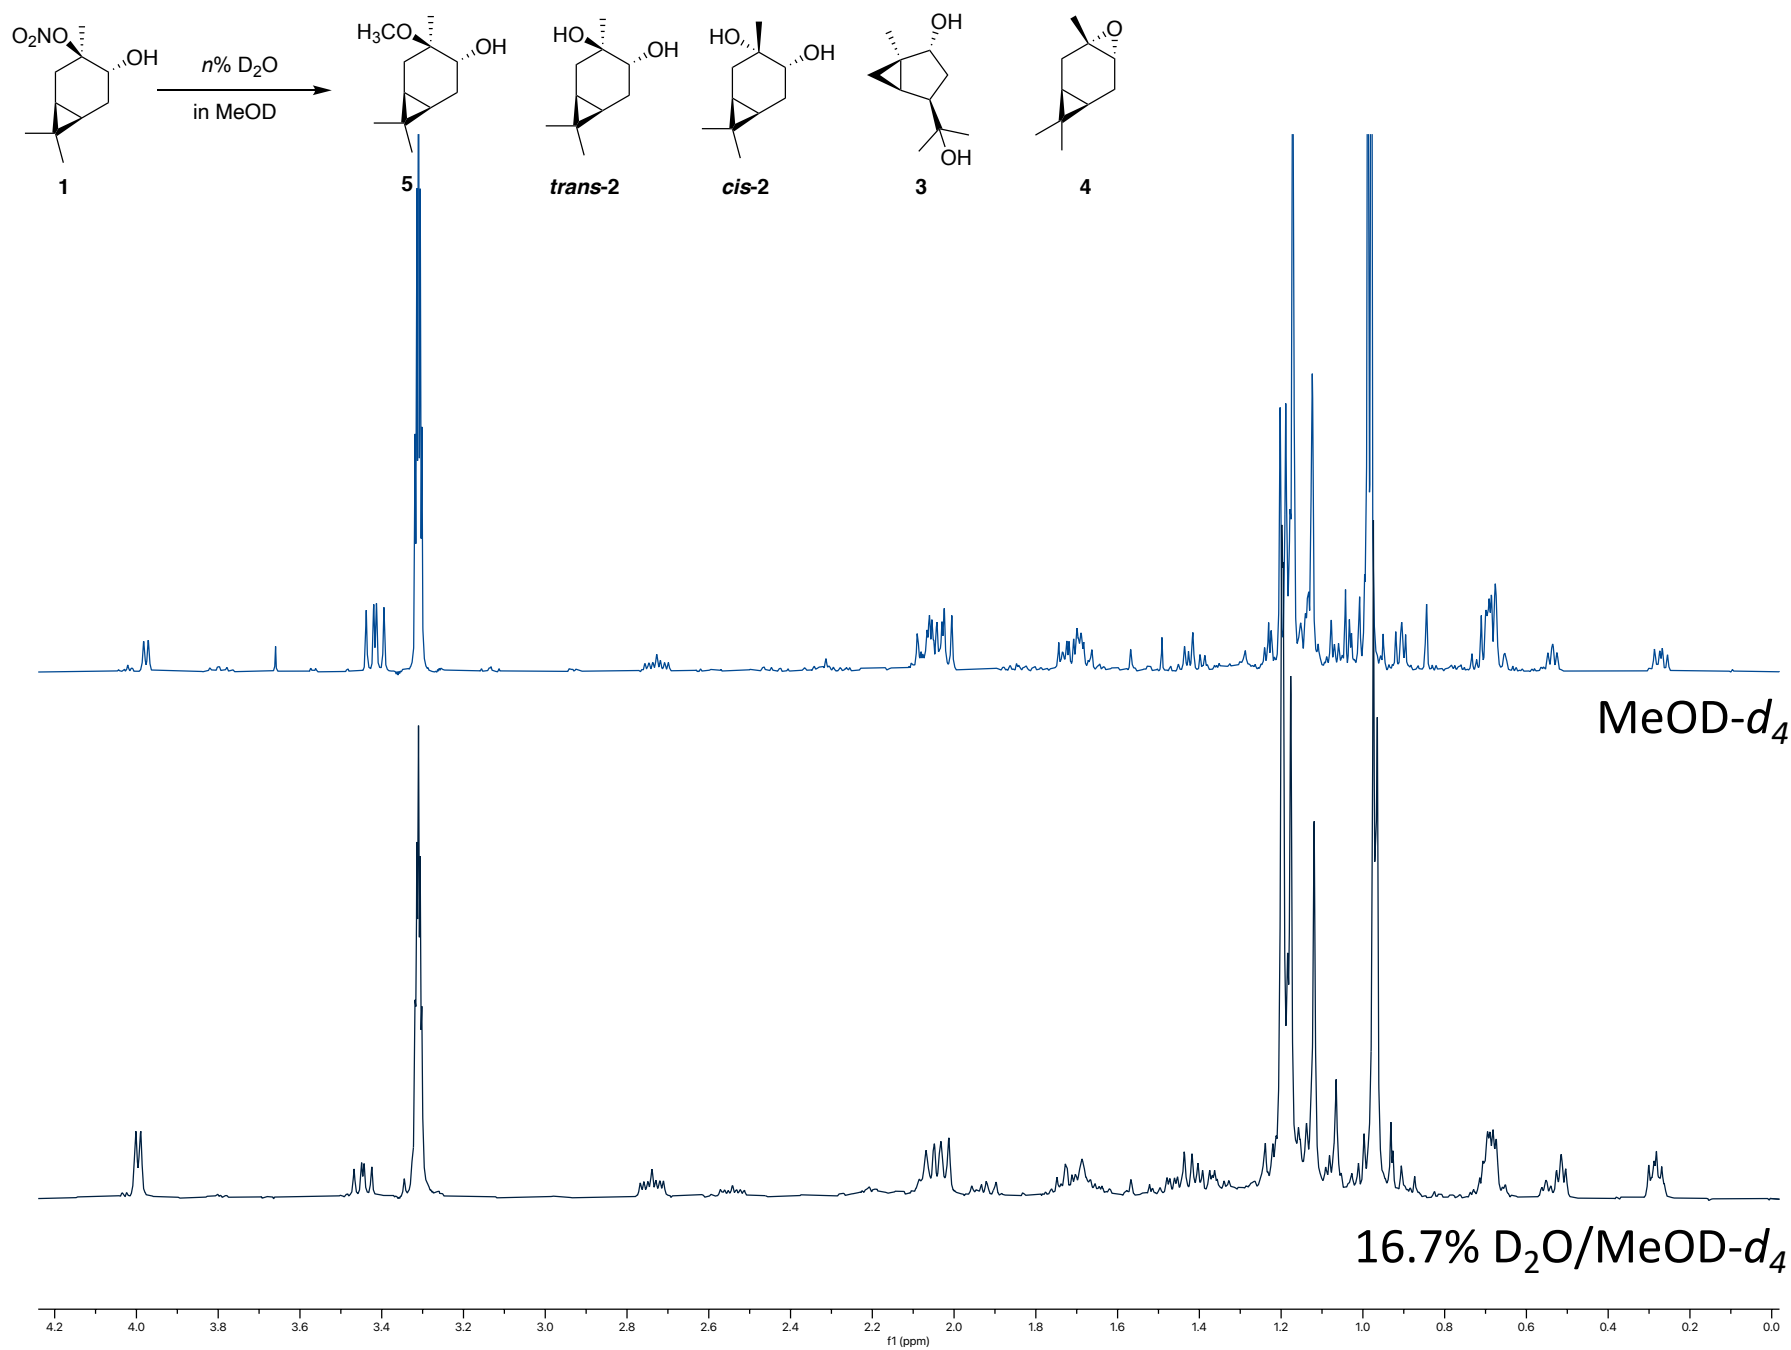

$^1\text{H}$  NMR (400 MHz) CHN **1** Reaction Mixtures in  $\text{D}_2\text{O}/\text{EtOD-}d_6$

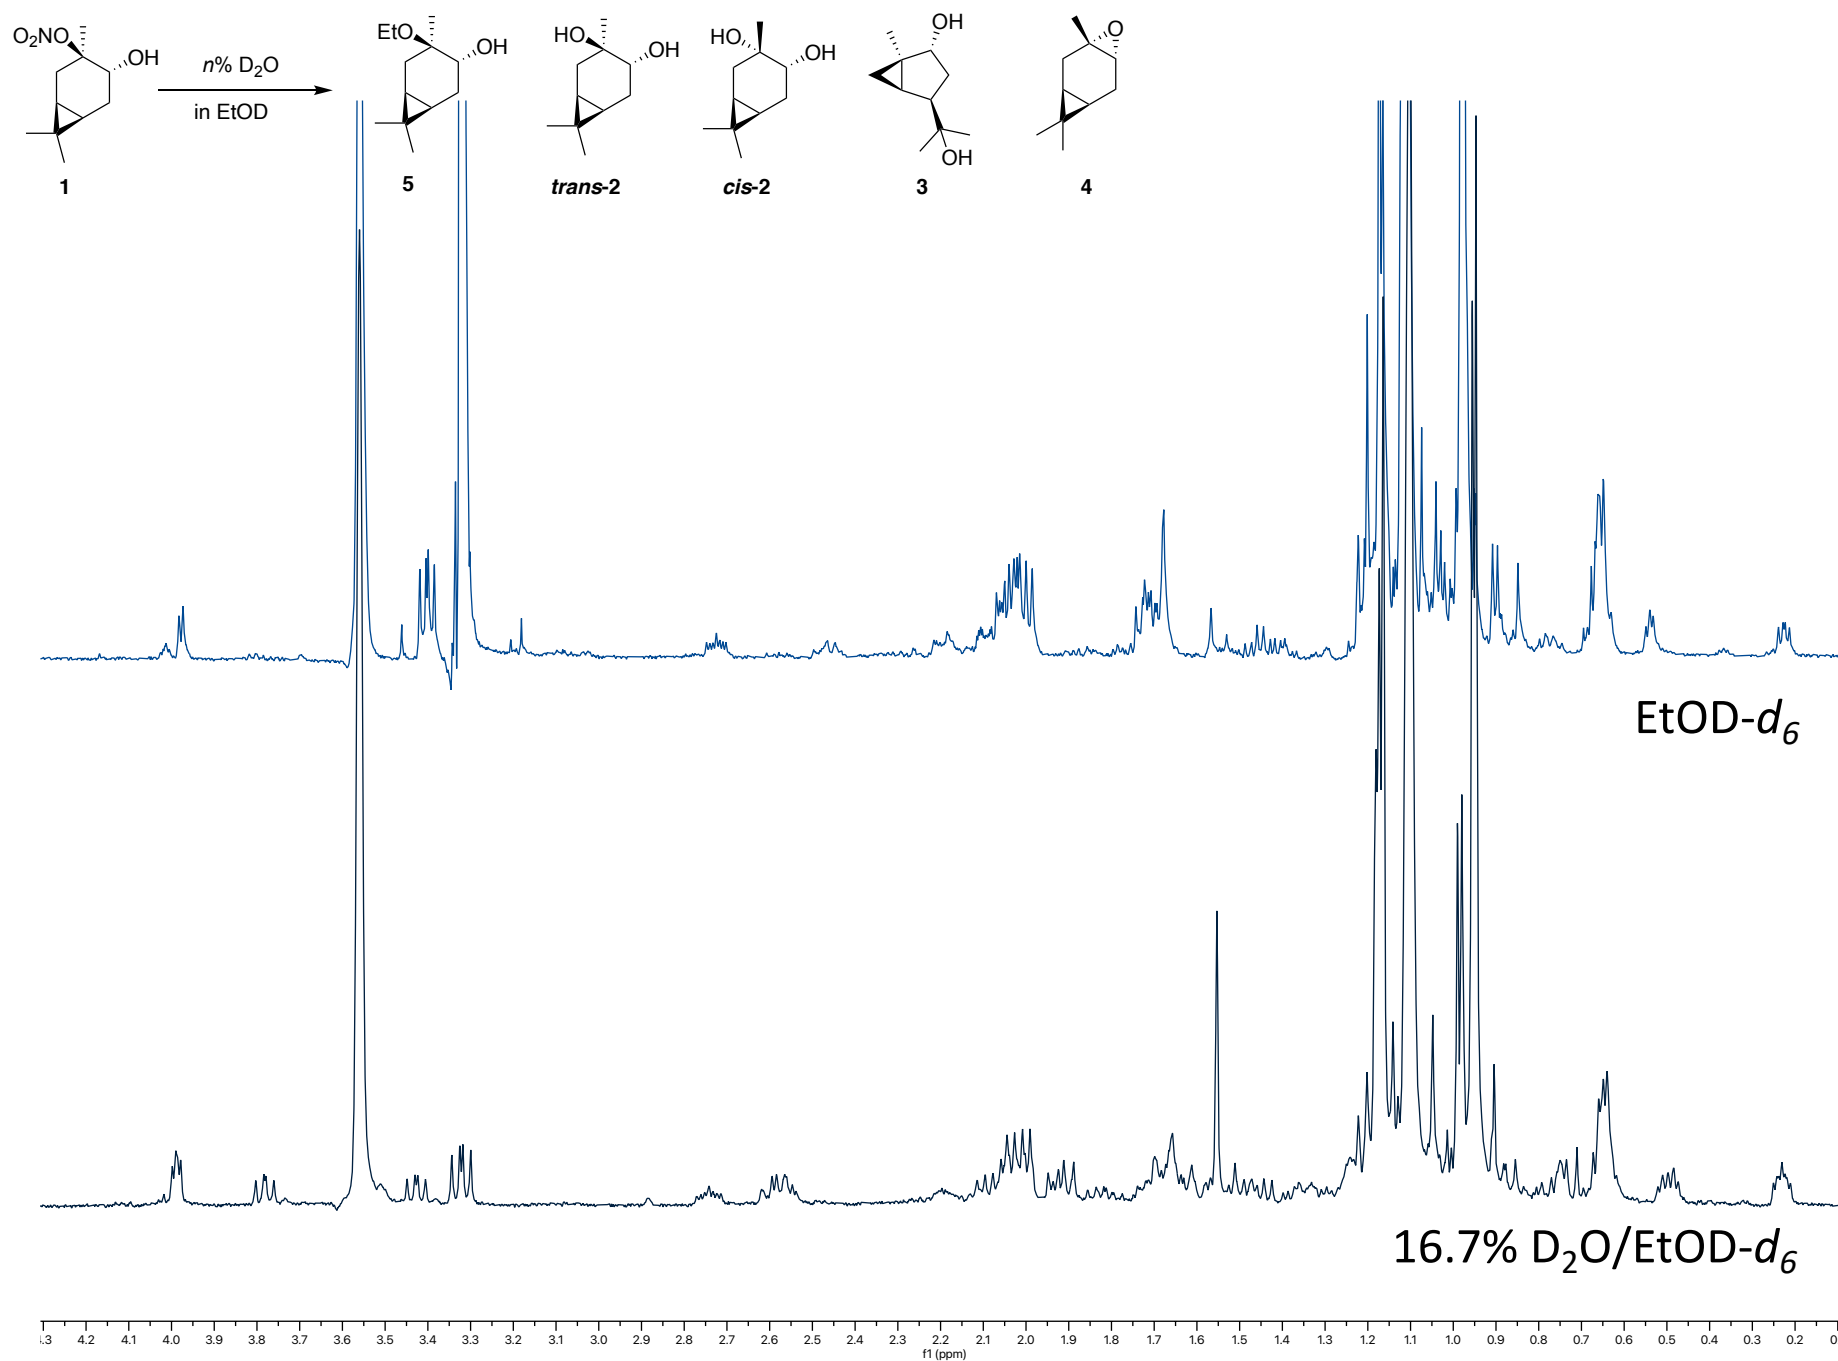

$^1\text{H}$  NMR (400 MHz) CHN **1** Reaction Mixtures with NaCl in 8.4%  $\text{D}_2\text{O}/\text{DMSO}-d_6$

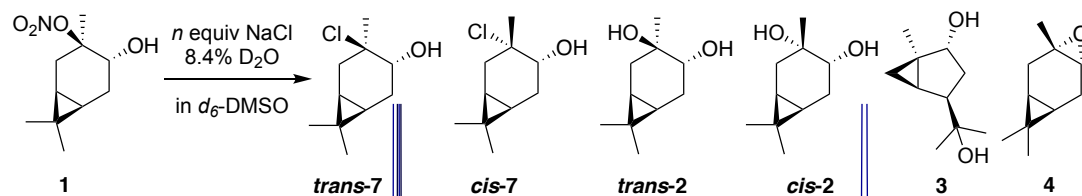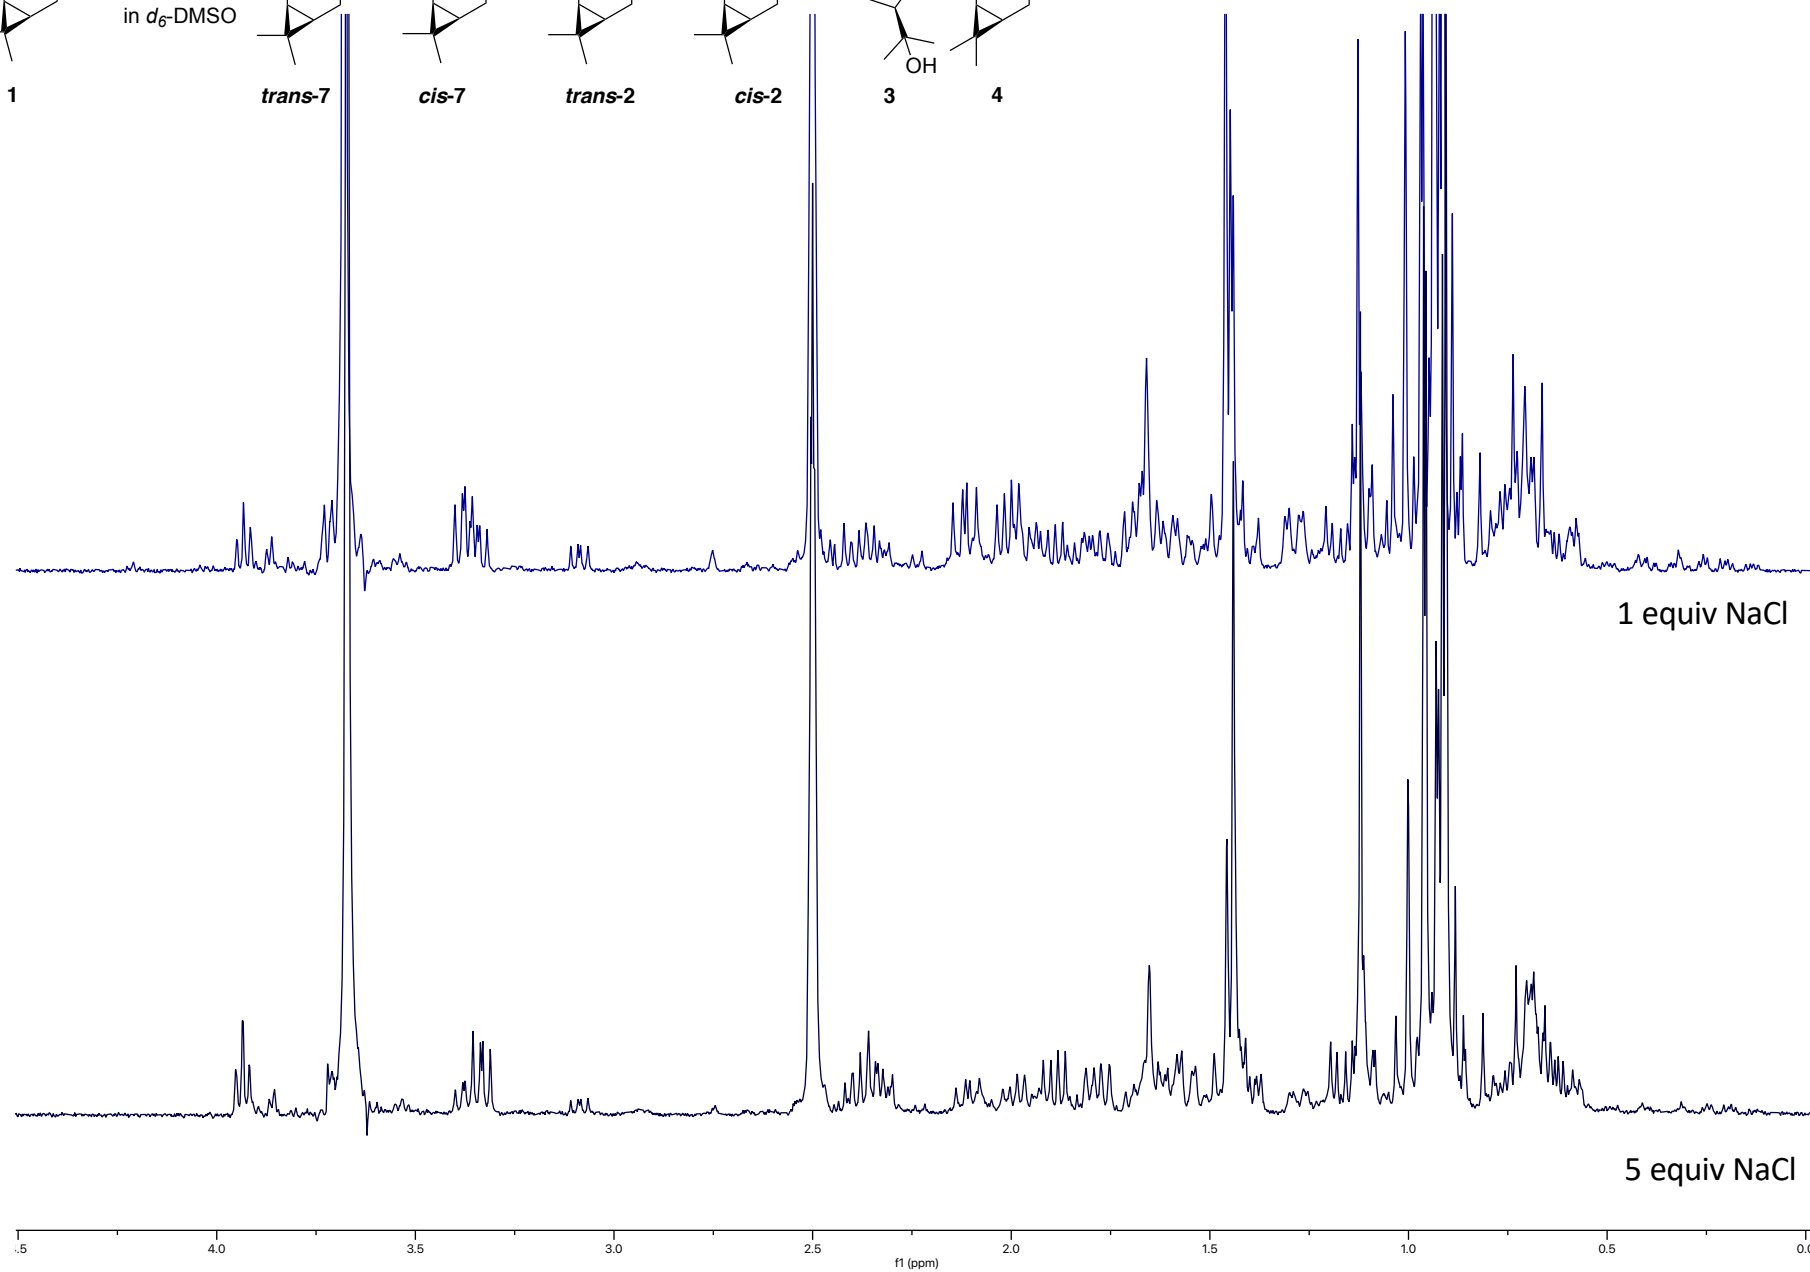

Supplement: s1 [file s1]
